# Supplementary material for: Chiral phosphoproline-catalyzed asymmetric Michael addition of ketones to nitroolefins: an experimental and theoretical study
Source: Royal Society of Chemistry journal article supplement (doi:10.1039/c1ob06143g), 2011-01-01
Supplement: c1ob06143g.pdf [file c1ob06143g.pdf]

**Supporting Information**  
**of**  
**Chiral Phosphoprolin-Catalyzed Asymmetric Michael Addition of Ketones to Nitroolefins:**  
**an Experimental and Theoretical Study.**

**Zhiping Zeng,<sup>a</sup> Ping Luo,<sup>a</sup> Yao Jiang,<sup>a</sup> Yan Liu,<sup>a</sup> Guo Tang,<sup>a</sup> Pengxiang Xu,<sup>a</sup> Yufen Zhao<sup>\*a b</sup> and G. Michael Blackburn<sup>\*c</sup>**

<sup>a</sup> Department of Chemistry and The Key Laboratory for Chemical Biology of Fujian Province, College of Chemistry and Chemical Engineering, Xiamen University, Xiamen, 361005, P. R. China. Fax: +8605922185780; Tel: +8605922185780; E-mail: yfzhao@xmu.edu.cn.

<sup>b</sup>The Key Laboratory for Bioorganic Phosphorus Chemistry and Chemical Biology (Ministry of Education), Department of Chemistry, School of Sciences, Tsinghua University, Beijing, 100084, P. R. China.

<sup>c</sup>Krebs Institute, Department of Molecular Biology & Biotechnology, Sheffield University, S10 2TN, UK. Fax: +44 114 2222800; Tel: +44 114 2229462; E-mail: g.m.blackburn@shef.ac.uk;

|        |                                                                          |    |
|--------|--------------------------------------------------------------------------|----|
| 1      | General Information:.....                                                | 2  |
| 2      | Experimental section.....                                                | 2  |
| 2.1    | Synthesis of new catalyst 4:.....                                        | 2  |
| 2.2    | Characterization data of Michael products 3a-3m.....                     | 4  |
| 2.3    | <sup>1</sup> H NMR and <sup>13</sup> C NMR Spectra of all compounds..... | 9  |
| 2.3.1  | The spectra of compound 3SR.....                                         | 9  |
| 2.3.2  | The spectra of compound 4.....                                           | 11 |
| 2.3.3  | The spectra of compound 5.....                                           | 14 |
| 2.3.4  | The spectra of compound 3a.....                                          | 16 |
| 2.3.5  | The spectra of compound 3b.....                                          | 17 |
| 2.3.6  | The spectra of compound 3c.....                                          | 18 |
| 2.3.7  | The spectra of compound 3d.....                                          | 19 |
| 2.3.8  | The spectra of compound 3e.....                                          | 20 |
| 2.3.9  | The spectra of compound 3f.....                                          | 21 |
| 2.3.10 | The spectra of compound 3g.....                                          | 22 |
| 2.3.11 | The spectra of compound 3h.....                                          | 23 |
| 2.3.12 | The spectra of compound 3i.....                                          | 24 |
| 2.3.13 | The spectra of compound 3j.....                                          | 25 |
| 2.3.14 | The spectra of compound 3k.....                                          | 26 |
| 2.4    | The X-ray data of compound 5.....                                        | 27 |
| 2.5    | The HPLC Spectra of all compounds 3a~3k.....                             | 30 |
| 2.5.1  | The HPLC Spectra of compound 3a.....                                     | 30 |
| 2.5.2  | The HPLC Spectra of compound 3b <sup>[11]</sup> .....                    | 31 |
| 2.5.3  | The HPLC Spectra of compound 3c.....                                     | 32 |
| 2.5.4  | The HPLC Spectra of compound 3d.....                                     | 33 |
| 2.5.5  | The HPLC Spectra of compound 3e.....                                     | 34 |
| 2.5.6  | The HPLC Spectra of compound 3f.....                                     | 35 |
| 2.5.7  | The HPLC Spectra of compound 3g.....                                     | 36 |
| 2.5.8  | The HPLC Spectra of compound 3h.....                                     | 37 |
| 2.5.9  | The HPLC Spectra of compound 3i.....                                     | 38 |
| 2.5.10 | The HPLC Spectra of compound 3j.....                                     | 39 |
| 2.5.11 | The HPLC Spectra of compound 3k.....                                     | 40 |
| 3      | Cartesian Coordinates of Intermediates and Transition States.....        | 41 |
| 4      | Reference.....                                                           | 53 |

## 1 General Information:

- ◆  $^1\text{H}$  NMR (400 MHz) and  $^{13}\text{C}$  NMR (100 MHz) spectra were measured on Bruker 400M spectrometers with  $\text{CDCl}_3$  as solvent and tetramethylsilane (TMS) as internal standard or 85%  $\text{H}_3\text{PO}_4$  as external standard for  $^{31}\text{P}$  NMR. Chemical shifts were reported in units (ppm) by assigning TMS resonance in the  $^1\text{H}$  spectrum as 0.00 ppm and  $\text{CDCl}_3$  resonance in the  $^{13}\text{C}$  spectrum as 77.0 ppm. All coupling constants ( $J$  values) were reported in Hertz (Hz). Chemical shifts of common trace  $^1\text{H}$  NMR impurities (ppm):  $\text{H}_2\text{O}$ : 1.56,  $\text{CHCl}_3$ : 7.26.
- ◆ Melting points were determined on a WRS-1B melting point apparatus and were uncorrected.
- ◆ Infrared spectra were measured with a Nicolet Avatar 330 FT-IR spectrometer.
- ◆ Optical rotations were measured in  $\text{CHCl}_3$  with a Perkin-Elmer 341 automatic polarimeter. Absolute configuration of the products was determined by comparison with compounds previously published.
- ◆ Elemental analyses were performed by the Elemental Analysis Section of Xiamen University. HRMS spectra were recorded on a Bruker En Apex ultra 7.0 FT-MS apparatus. All new compounds were further characterized by elemental analysis or HRMS.
- ◆ Enantioselectivities were determined by High performance liquid chromatography (HPLC) analysis employing a Daicel Chirapak AS-H column.
- ◆ All the reagents were purchased from Alfa Aesar and J&K Chemical and used without further purification. Column chromatography was performed on silica gel 300- 400 mesh. Spectroscopy data of the known compounds matches with the data reported in the corresponding references. Nitroolefins were synthesized according to literature procedures<sup>[1]</sup>. the product from L-proline catalysed reaction gave very poor enantioselectivity<sup>[2]</sup>. Accordingly, These enantiomers were used as a reference to determine the ee values for our reaction.

## 2 Experimental section.

### 2.1 Synthesis of new catalyst 4:

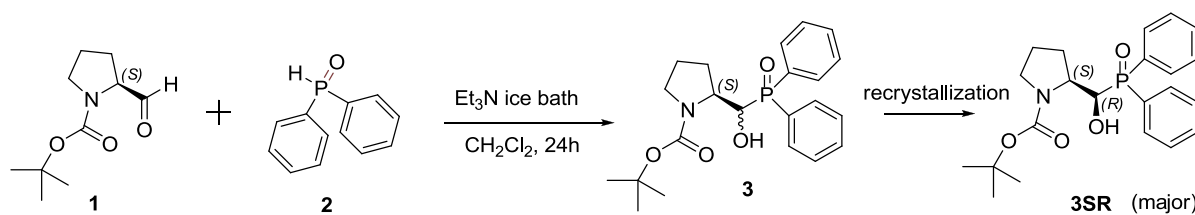

#### *S*-2-(*R*-Diphenylphosphanyl-hydroxy-methyl)-pyrrolidine-1-carboxylic acid tert-butyl ester (3SR)

m.p. 162 °C (solvent: acetate);  $[\alpha]_{\text{D}}^{25} = -5.40$  ( $c = 1.0$ ,  $\text{CHCl}_3$ ),  $^1\text{H}$  NMR (400 MHz,  $\text{CDCl}_3$ )  $\delta$  7.94 (m, 4H), 7.44 (m, 6H), 6.09 (d,  $J = 7.2$  Hz, 1H), 4.79 (s, 1H), 4.41 - 4.20 (m, 1H), 3.56 - 3.42 (m, 1H), 3.33 (ddd,  $J = 10.6, 8.5, 6.7$  Hz, 1H), 2.59 (m, 1H), 2.19 - 2.00 (m, 2H), 1.76 - 1.59 (m, 1H), 1.28 - 1.13 (m, 9H);  $^{13}\text{C}$  NMR (101 MHz,  $\text{CDCl}_3$ )  $\delta$  157.2, 134.2 (d,  $J = 95.8$  Hz), 132.2 (d,  $J = 8.3$  Hz), 131.5 (d,  $J = 11.3$  Hz), 130.9 (d,  $J = 8.7$  Hz), 128.5 (d,  $J = 11.3$  Hz), 128.0 (d,  $J = 11.3$  Hz), 80.5, 73.9 (d,  $J = 83.2$  Hz) 62.1, 48.2, 28.3, 24.6(2C);  $^{31}\text{P}$  NMR (162 MHz,  $\text{CDCl}_3$ )  $\delta$  26.56; IR (KBr, film),  $\nu_{\text{max}}$  ( $\text{cm}^{-1}$ ): 3440, 3132, 2965, 2927, 2869, 1690, 1434,

1396, 1360, 1159, 1117, 1085, 752, 729, 695, 528; Anal. calcd. (%) for C<sub>22</sub>H<sub>28</sub>NO<sub>4</sub>P: C, 65.82; H, 7.03; N, 3.49; Found: C, 65.90; H, 7.33; N, 3.46.

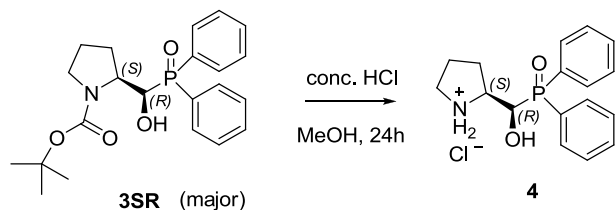

**S-2-[R-(Diphenyl-phosphinoyl)-hydroxy-methyl]-pyrrolidinium chloride (4)**

m.p. 130 °C (solvent: MeOH);  $[\alpha]_D^{25} = -23.8$  ( $c = 1.3$ , CHCl<sub>3</sub>) <sup>1</sup>H NMR (CDCl<sub>3</sub>, 400MHz): 1.47 - 1.55(m, 1H), 1.69 - 1.82 (m, 2H), 1.83 - 1.93 (m, 1H), 2.91 (s, 1H), 3.21 (s, 2H), 4.18 (s, 1H), 5.34 - 5.38 (m, 1H), 6.17 (dd, 1H,  $J = 6.3, 18.4$  Hz), 7.38 - 7.43 (m, 2H), 7.44 - 7.51 (m, 3H), 7.54 - 7.61 (m, 1H), 7.82 - 7.87 (m, 2H), 7.91 - 7.96 (m, 2H), 9.32 (s, 1H), 9.73 (s, 1H); <sup>13</sup>C NMR (101 MHz, CDCl<sub>3</sub>)  $\delta$  132.6 (d,  $J = 8.6$  Hz), 131.3 (d,  $J = 9.4$  Hz), 129.1 (d,  $J = 227.8$  Hz), 128.9 (d,  $J = 11.8$  Hz), 128.5 (d,  $J = 11.6$  Hz), 67.8 (d,  $J = 90.9$  Hz), 61.1 (d,  $J = 9.1$  Hz), 45.4, 24.6; <sup>31</sup>P NMR (CDCl<sub>3</sub>, 160 MHz): 29.10; IR(KBr, film)  $\nu_{\max}(\text{cm}^{-1})$ : 3410, 3205, 3058, 2981, 2767, 2940, 1623, 1588, 1434, 1393, 1159, 1120, 1095, 1069, 1024, 995, 976, 749, 723, 694, 534; ESI-HRMS: calcd. for [C<sub>17</sub>H<sub>20</sub>NO<sub>2</sub>P+H<sup>+</sup>], 302.1304; found, 302.1303.

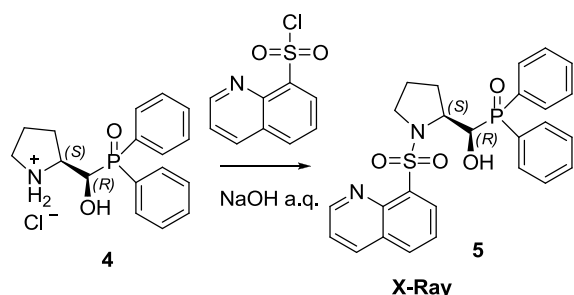

**R-(Diphenyl-phosphinoyl)-[S-1-(quinoline-8-sulfonyl)-pyrrolidin-2-yl]-methanol (5)**

m.p. 168 °C (solvent: CH<sub>2</sub>Cl<sub>2</sub>:MeOH = 20 : 1);  $[\alpha]_D^{25} = -73.3$  ( $c = 1.2$ , CHCl<sub>3</sub>); <sup>1</sup>H NMR (CDCl<sub>3</sub>, 400 MHz): 1.42 - 1.53 (m, 1H), 1.78 - 1.88 (m, 2H), 2.20 - 2.29 (m, 2H), 3.06 - 3.12 (m, 1H), 3.50 (td,  $J = 4.28, 8.66$  Hz, 1H), 4.76 (tt,  $J = 1.80, 7.25$  Hz, 1H), 5.12 (dd,  $J = 5.20, 20.01$  Hz, 1H), 5.30 (s, 1H), 5.64 (t,  $J = 5.54$  Hz, 1H), 7.45 - 7.59 (m, 7H), 7.63 (t,  $J = 7.8$  Hz, 1H), 7.98-8.04 (m, 4H), 8.06 (dd,  $J = 1.2, 8.2$  Hz, 1H), 8.27 (dd,  $J = 1.7, 8.4$  Hz, 1H), 8.54 (dd,  $J = 1.3, 7.4$  Hz, 1H), 8.78 (dd,  $J = 1.7, 4.2$  Hz, 1H); <sup>13</sup>C NMR (CDCl<sub>3</sub>, 100 MHz): 25.4, 27.1, 48.9, 62.1 (d,  $J = 9.47$  Hz), 71.0 (d,  $J = 85.73$  Hz), 122.1, 125.6, 128.4 (d,  $J = 11.68$  Hz), 128.7 (d,  $J = 11.40$  Hz), 129.2, 131.2 (d,  $J = 9.03$  Hz), 131.9 (d,  $J = 8.85$  Hz), 131.7 (d,  $J = 2.12$  Hz), 131.3 (d,  $J = 1.78$  Hz), 134.1, 134.5, 137.2, 143.6, 151.2; <sup>31</sup>P NMR (CDCl<sub>3</sub>, 160 MHz): 27.76; IR(KBr, film),  $\nu_{\max}(\text{cm}^{-1})$ : 3430, 3202, 3058, 2932, 2920, 2872, 2850, 1610, 1559, 1495, 1434, 1338, 1213, 1172, 1165, 1139, 1117, 1095, 1066, 1024, 1002, 823, 790, 743, 723, 695, 605, 573; Anal. calcd. (%) for C<sub>26</sub>H<sub>25</sub>N<sub>2</sub>O<sub>4</sub>PS: C, 63.40; H, 5.12; N, 5.69. Found: C, 63.38; H, 4.86; N, 5.55.

## 2.2 Characterization data of Michael products 3a-3m

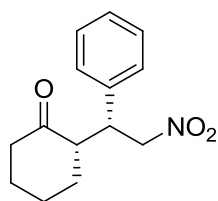

(S)-2-((R)-2-Nitro-1-phenylethyl)cyclohexanone

**3a**<sup>[3]</sup>: prepared according to the general procedure from (*E*)-(2-nitrovinyl)benzene (38 mg, 0.25 mmol) to provide the title compound as a white solid (51 mg, 82% yield) after silica gel chromatography (EtOAc : hexane = 1 : 9). white solid; m.p. 124.5 °C (solvent: EtOAc : hexane = 1 : 9);  $[\alpha]_D^{20} = -20.4$  (c = 1.0, CHCl<sub>3</sub>); <sup>1</sup>H NMR (400 MHz, CDCl<sub>3</sub>) δ 7.40 - 7.23 (m, 3H), 7.17 (d, *J* = 7.7 Hz, 2H), 4.93 (dd, *J* = 12.5, 4.5 Hz, 1H), 4.64 (dd, *J* = 12.4, 9.9 Hz, 1H), 3.79 (td, *J* = 9.9, 4.5 Hz, 1H), 2.76 - 2.64 (m, 1H), 2.52 - 2.45 (m, 1H), 2.39 (td, *J* = 12.6, 5.9 Hz, 1H), 2.08 (dtd, *J* = 8.8, 5.9, 3.0 Hz, 1H), 1.86 - 1.57 (m, 4H), 1.34 - 1.16 (m, 1H); <sup>13</sup>C NMR (101 MHz, CDCl<sub>3</sub>) δ 211.8, 137.8, 129.0, 128.2, 127.8, 78.9, 52.6, 44.0, 42.7, 33.2, 28.5, 25.0; HPLC: Chiralpak AS-H (hexane/*i*-PrOH, 85/15, flow rate 1 mL/min, λ = 230 nm), *t*R (minor) = 17.9 min, *t*R (major) = 29.4 min; 96% ee.

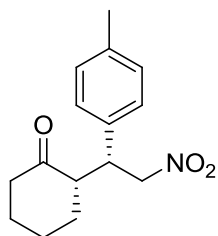

(S)-2-((R)-2-Nitro-1-*p*-tolylethyl)cyclohexanone

**3b**: prepared according to the general procedure from (*E*)-1-methyl-4-(2-nitrovinyl)benzene (41 mg, 0.25 mmol) to provide the title compound as a white solid (57 mg, 88% yield) after silica gel chromatography (EtOAc : hexane = 1 : 9). Crystals; m.p. 120.8 °C (solvent: EtOAc : hexane = 1 : 9);  $[\alpha]_D^{20} = -26.2$  (c = 1.0, CHCl<sub>3</sub>); <sup>1</sup>H NMR (400 MHz, CDCl<sub>3</sub>) δ 7.12 (d, *J* = 8.0 Hz, 2H), 7.04 (d, *J* = 8.1 Hz, 2H), 4.91 (dd, *J* = 12.4, 4.6 Hz, 1H), 4.61 (dd, *J* = 12.4, 9.9 Hz, 1H), 3.72 (td, *J* = 9.9, 4.6 Hz, 1H), 2.70 - 2.63 (m, 1H), 2.51 - 2.33 (m, 2H), 2.31 (s, 1H), 2.11 - 2.02 (m, 1H), 1.85 - 1.50 (m, 4H), 1.32 - 1.23 (m, 1H). <sup>13</sup>C NMR (101 MHz, CDCl<sub>3</sub>): δ 211.9, 137.4, 134.6, 129.6, 128.0, 79.0, 52.6, 43.6, 42.7, 33.1, 28.5, 25.0, 21.0. HPLC analysis (Chiralpak AS-H column, hexane: 2-propanol = 85:15, flow rate = 1.0 mL/min, wavelength = 230 nm): *R*<sub>t</sub> = 10.94 (minor) and 16.91 min (major); syn/anti = 92/8, 92% ee.

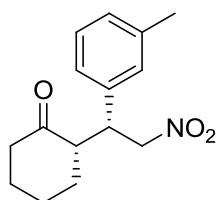

(S)-2-((R)-2-Nitro-1-*m*-tolylethyl)cyclohexanone

**3c<sup>[4]</sup>**: prepared according to the general procedure from (*E*)-1-methyl-3-(2-nitrovinyl)benzene (57 mg, 0.35 mmol) to provide the title compound as a white solid (74 mg, 91% yield) after silica gel chromatography (EtOAc : hexane = 1 : 9); pale yellow solid; m.p. 96.2 °C (solvent: EtOAc : hexane = 1 : 9);  $[\alpha]_D^{20} = -27.0$  (c = 1.2, CHCl<sub>3</sub>); <sup>1</sup>H NMR (400 MHz, CDCl<sub>3</sub>) δ 7.23 - 7.17 (m, 1H), 7.07 (d, *J* = 7.4 Hz, 1H), 6.95 (d, *J* = 6.1 Hz, 1H), 4.92 (dd, *J* = 12.5, 4.5 Hz, 1H), 4.62 (dd, *J* = 12.5, 9.9 Hz, 1H), 3.71 (td, *J* = 9.9, 4.5 Hz, 1H), 2.71 - 2.63 (m, 1H), 2.53 - 2.39 (m, 2H), 2.32 (s, 3H), 2.12 - 2.03 (m, 1H), 1.82 - 1.51 (m, 4H), 1.24 (m, 1H). <sup>13</sup>C NMR (101 MHz, CDCl<sub>3</sub>) δ 211.9, 138.6, 137.7, 129.0, 128.8, 128.5, 125.0, 78.9, 52.6, 43.9, 42.7, 33.2, 28.5, 25.0, 21.4; HPLC analysis (Chiralpak AS-H column, hexane: 2-propanol = 85:15, flow rate = 1.0 mL/min, wavelength = 230 nm): Rt = 10.94 (minor) and 16.20 min (major), syn/anti = 92/8, 96% ee.

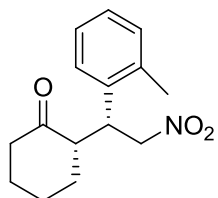

(S)-2-((R)-2-Nitro-1-*o*-tolylethyl)cyclohexanone

**3d**: prepared according to the general procedure from (*E*)-1-methyl-2-(2-nitrovinyl)benzene (53 mg, 0.33 mmol) to provide the title compound as a white solid (67 mg, 87% yield) after silica gel chromatography (EtOAc : hexane = 1 : 9); white liquid;  $[\alpha]_D^{20} = -27.7$  (c = 1.3, CHCl<sub>3</sub>); <sup>1</sup>H NMR (400 MHz, CDCl<sub>3</sub>) δ 7.22 - 7.08 (m, 4H), 4.99 (dd, *J* = 12.6, 4.4 Hz, 1H), 4.61 (dd, *J* = 12.6, 10.1 Hz, 1H), 4.12 (td, *J* = 10.3, 4.4 Hz, 1H), 2.71 - 2.60 (m, 1H), 2.51 - 2.44 (m, 1H), 2.44 - 2.33 (m, 4H), 2.13 - 2.06 (m, 1H), 1.80 - 1.49 (m, 4H), 1.29 - 1.22 (m, 1H); <sup>13</sup>C NMR (101 MHz, CDCl<sub>3</sub>) δ 212.2, 137.4, 136.4, 131.0, 127.3, 126.7, 125.7, 78.8, 53.5, 42.9, 38.3, 32.9, 28.7, 25.4, 19.9; HPLC analysis (Chiralpak AS-H column, hexane: 2-propanol = 85:15, flow rate = 1.0 mL/min, wavelength = 230 nm): Rt = 10.83 (minor) and 15.88 min (major) syn/anti = 93/7, 95% ee.

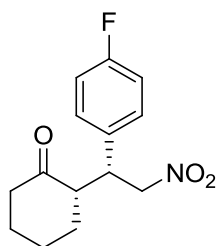

(S)-2-((R)-1-(4-Fluorophenyl)-2-nitroethyl)cyclohexanone

**3e<sup>[5]</sup>**: prepared according to the general procedure from (*E*)-1-fluoro-4-(2-nitrovinyl)benzene (42 mg, 0.25 mmol) to provide the title compound as a white solid (66 mg, 99% yield) after silica gel chromatography

(EtOAc : hexane = 1 : 9); pale yellow solid; m.p. 56.8 °C (solvent: EtOAc : hexane = 1 : 9);  $[\alpha]_D^{20} = -16.4$  ( $c = 1.0$ ,  $\text{CHCl}_3$ );  $^1\text{H NMR}$  (400 MHz,  $\text{CDCl}_3$ )  $\delta$  7.22 - 7.09 (m, 2H), 7.07 - 6.94 (m, 2H), 4.92 (dd,  $J = 12.5, 4.6$  Hz, 1H), 4.60 (dd,  $J = 12.5, 9.9$  Hz, 1H), 3.77 (td,  $J = 9.8, 4.6$  Hz, 1H), 2.73 - 2.61 (m, 1H), 2.52 - 2.44 (m, 1H), 2.42-2.34 (m, 1H), 2.15 - 2.03 (m, 1H), 1.85 - 1.51 (m, 4H), 1.26 (m, 1H).  $^{13}\text{C NMR}$  (101 MHz,  $\text{CDCl}_3$ )  $\delta$  211.5, 162.2 (d,  $J = 246.7$  Hz), 133.5 (d,  $J = 3.4$  Hz), 129.8 (d,  $J = 8.0$  Hz), 115.9 (d,  $J = 21.5$  Hz), 78.8, 52.6, 43.3, 42.7, 33.1, 28.4, 25.0; HPLC analysis (Chiralpak AS-H column, hexane: 2-propanol = 85:15, flow rate = 1.0 mL/min, wavelength = 230 nm):  $R_t = 15.93$  (minor) and 24.71 min (major) syn/anti = 90/10, 94% ee.

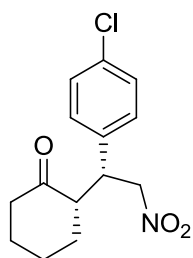

(S)-2-((R)-1-(4-Chlorophenyl)-2-nitroethyl)cyclohexanone

**3f<sup>[6]</sup>**: prepared according to the general procedure from (E)-1-chloro-4-(2-nitrovinyl)benzene (46 mg, 0.25 mmol) to provide the title compound as a white solid (61 mg, 87% yield) after silica gel chromatography (EtOAc : hexane = 1 : 9); pale yellow solid; m.p. 85.4 °C (solvent: EtOAc : hexane = 1 : 9);  $[\alpha]_D^{20} = -27.8$  ( $c = 1.1$ ,  $\text{CHCl}_3$ );  $^1\text{H NMR}$  (400 MHz,  $\text{CDCl}_3$ )  $\delta$  7.30 (dt,  $J = 8.80, 2.24$  Hz, 2H), 7.12 (dt,  $J = 8.76, 2.20$  Hz, 2H), 4.93 (dd,  $J = 12.6, 4.5$  Hz, 1H), 4.61 (dd,  $J = 12.6, 10.0$  Hz, 1H), 3.76 (td,  $J = 9.8, 4.5$  Hz, 1H), 2.69 - 2.61 (m, 1H), 2.51 - 2.33 (m, 2H), 2.06 - 2.11 (m, 1H), 1.83 - 1.54 (m, 4H), 1.21 - 1.28 (m, 1H);  $^{13}\text{C NMR}$  (101 MHz,  $\text{CDCl}_3$ )  $\delta$  211.4, 136.3, 133.7, 129.1, 129.2, 78.6, 52.4, 43.4, 42.7, 33.1, 28.4, 25.1; HPLC analysis (Chiralpak AS-H column, hexane: 2-propanol = 85:15, flow rate = 1.0 mL/min, wavelength = 230 nm):  $R_t = 15.09$  (minor) and 25.30 min (major), syn/anti = 92/8, 91% ee.

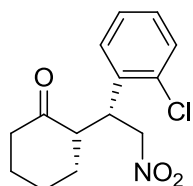

(S)-2-((R)-1-(2-Chlorophenyl)-2-nitroethyl)cyclohexanone

**3g<sup>[6]</sup>**: prepared according to the general procedure from (E)-1-chloro-4-(2-nitrovinyl)benzene (46 mg, 0.25 mmol) to provide the title compound as a white solid (66 mg, 94% yield) after silica gel chromatography (EtOAc : hexane = 1 : 9); white liquid;  $[\alpha]_D^{20} = -48.9$  ( $c = 0.9$ ,  $\text{CHCl}_3$ );  $^1\text{H NMR}$  (400 MHz,  $\text{CDCl}_3$ )  $\delta$  7.39 - 7.36 (m, 1H), 7.28 - 7.17 (m, 3H), 4.94 - 4.85 (m, 1H), 4.26 - 4.32 (m, 1H), 2.92 (td,  $J = 12.0, 5.1$  Hz, 1H), 2.52 - 2.44 (m, 1H), 2.35 - 2.43 (m, 1H), 2.07 - 2.13 (m, 1H), 1.58 - 1.83 (m, 4H), 1.31 - 1.38 (m, 1H);  $^{13}\text{C NMR}$  (101 MHz,  $\text{CDCl}_3$ )  $\delta$  211.6, 135.5, 134.5, 130.4, 128.9, 127.4, 77.2, 51.7, 42.8, 33.1, 29.7, 28.5, 25.3; HPLC analysis (Chiralpak AS-H column, hexane: 2-propanol = 85:15, flow rate = 1.0 mL/min, wavelength = 230 nm):  $R_t = 14.01$  (minor) and 19.31 min (major) syn/anti = 99/1, 96% ee.

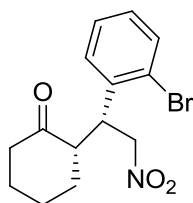

(S)-2-((R)-1-(2-Bromophenyl)-2-nitroethyl)cyclohexanone

**3h<sup>[7]</sup>**: prepared according to the general procedure from (E)-1-bromo-2-(2-nitrovinyl)benzene (57 mg, 0.25 mmol) to provide the title compound as a white solid (74 mg, 91% yield) after silica gel chromatography (EtOAc : hexane = 1 : 9); white solid; m.p. 80.3 °C (solvent: EtOAc : hexane = 1 : 9);  $[\alpha]_D^{20} = -48.6$  (c = 1.4, CHCl<sub>3</sub>); <sup>1</sup>H NMR (400 MHz, CDCl<sub>3</sub>) δ 7.58 (dd, *J* = 8.0, 1.2 Hz, 1H), 7.30 (td, *J* = 7.6, 1.2 Hz, 1H), 7.22 (dd, *J* = 7.8, 1.7 Hz, 1H), 7.13 (td, *J* = 8.0, 1.8 Hz, 1H), 4.97 - 4.84 (m, 2H), 4.31 (m, 1H), 2.90 (br. s, 1H), 2.51 - 2.44 (m, 2H), 2.37 (tdd, *J* = 12.8, 5.9, 0.9 Hz, 1H), 2.10 (m, 1H), 1.86 - 1.53 (m, 4H), 1.40 (m, 1H); <sup>13</sup>C NMR (101 MHz, CDCl<sub>3</sub>) δ 211.5, 137.3, 133.7, 129.1, 128.0, 77.3, 52.1, 42.8, 33.0, 28.5, 25.3; HPLC analysis (Chiralpak AS-H column, hexane: 2-propanol = 85:15, flow rate = 1.0 mL/min, wavelength = 230 nm): Rt = 14.97 (minor) and 20.12 min (major) syn/anti = 99/1, 96% ee.

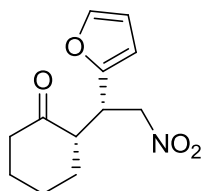

(S)-2-((S)-1-(Furan-2-yl)-2-nitroethyl)cyclohexanone

**3i<sup>[8]</sup>**: prepared according to the general procedure from (E)-2-(2-nitrovinyl)furan (35 mg, 0.25 mmol) to provide the title compound as a white solid (55 mg, 93% yield) after silica gel chromatography (EtOAc : hexane = 1 : 9); yellow liquid;  $[\alpha]_D^{20} = -10.5$  (c = 1.0, CHCl<sub>3</sub>); <sup>1</sup>H NMR (400 MHz, CDCl<sub>3</sub>) δ 7.33 (m, 1H), 6.29 (m, 1H), 6.21 - 6.10 (m, 1H), 5.07 - 4.53 (m, 2H), 3.97 (td, *J* = 9.1, 4.8 Hz, 1H), 2.86 - 2.71 (m, 1H), 2.51 - 2.30 (m, 2H), 2.20 - 2.04 (m, 1H), 1.96 - 1.58 (m, 5H), 1.36 - 1.24 (m, 1H); <sup>13</sup>C NMR (101 MHz, CDCl<sub>3</sub>) δ 210.9, 151.0, 142.3, 110.3, 109.0, 76.7, 51.1, 42.6, 37.6, 32.5, 28.2, 25.1; HPLC analysis (Chiralpak AS-H column, hexane: 2-propanol = 85:15, flow rate = 1.0 mL/min, wavelength = 254 nm): Rt = 12.75 (minor) and 15.28 min (major), syn/anti = 82/18, 91% ee.

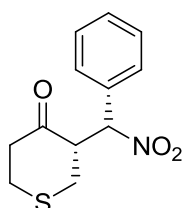

(S)-3-((R)-Nitro(phenyl)methyl)dihydro-2H-thiopyran-4(3H)-one



**3j**<sup>[9]</sup>: To a solution of *trans*-nitrostyrene (38 mg, 0.25 mmol) and tetrahydrothiopyran-4-one **1b** (290 mg, 2.5 mmol) was added catalyst **4** (0.0125 mmol) in the presence of 10 mmol % 4-NO<sub>2</sub>C<sub>6</sub>H<sub>4</sub>COOH and 50 μL 1 mol/L KOH. The resulting mixture was stirred at room temperature (30 °C). After the reaction was complete (monitored by TLC), the resulting residue was then purified by flash chromatography (hexane/EtOAc = 10/1) to give the product as white solid (84 mg, 87% yield). white solid; m.p. 121.3 °C (solvent: EtOAc : hexane = 1 : 10); [α]<sub>D</sub><sup>20</sup> = -27.3 (c = 1.8, CHCl<sub>3</sub>); <sup>1</sup>H NMR (400 MHz, CDCl<sub>3</sub>) δ 7.45 - 6.96 (m, 5H), 4.62 (ddd, *J* = 22.3, 12.6, 7.2 Hz, 2H), 3.91 (td, *J* = 10.2, 4.6 Hz, 1H), 3.21 - 2.64 (m, 5H), 2.59 - 2.51 (m, 1H), 2.39 (dd, *J* = 13.9, 9.3 Hz, 1H); <sup>13</sup>C NMR (101 MHz, CDCl<sub>3</sub>): δ 209.5, 136.5, 129.3, 128.3, 128.2, 78.6, 55.0, 44.5, 43.5, 35.1, 31.6; HPLC analysis (Chiralpak AS-H column, hexane: 2-propanol = 85:15, flow rate = 1.0 mL/min, wavelength = 254 nm): Rt = 18.79(minor) and 24.78min (major), syn/anti = 95/5, 85% ee.

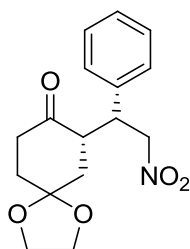

(S)-7-((R)-2-Nitro-1-phenylethyl)-1,4-dioxaspiro[4.5]decan-8-one

**3k**<sup>[10]</sup>: To a solution of *trans*-nitrostyrene (38 mg, 0.25 mmol) and tetrahydrothiopyran-4-one **1c** (390 mg, 2.5 mmol) was added catalyst **4** (0.0125 mmol) in the presence of 10 mmol % 4-NO<sub>2</sub>C<sub>6</sub>H<sub>4</sub>COOH and 50 μL 1 mol/L KOH. The resulting mixture was stirred at room 30 °C. After the reaction was complete (monitored by TLC), the resulting residue was then purified by flash chromatography (hexane/EtOAc = 10/1) to give the product as white solid (70 mg, 90% yield). Crystals; m.p. 110 °C (solvent: EtOAc : hexane = 1 : 10); [α]<sub>D</sub><sup>20</sup> = -9.8 (c = 1.0, CHCl<sub>3</sub>); <sup>1</sup>H NMR (400 MHz, CDCl<sub>3</sub>) δ 7.32 - 7.14 (m, 3H), 7.09 (d, *J* = 7.0 Hz, 2H), 5.05 - 4.71 (m, 1H), 4.54 (dd, *J* = 12.4, 9.9 Hz, 1H), 4.03 - 3.55 (m, 5H), 2.99 (ddd, *J* = 12.8, 10.0, 5.5 Hz, 1H), 2.63 (td, *J* = 13.5, 6.5 Hz, 1H), 2.39 (ddd, *J* = 13.8, 5.0, 3.6 Hz, 1H), 2.04 - 1.80 (m, 2H), 1.61 (ddd, *J* = 13.3, 5.4, 3.4 Hz, 1H), 1.55 - 1.42 (m, 1H); <sup>13</sup>C NMR (101 MHz, CDCl<sub>3</sub>): δ 210.3, 137.3, 129.0, 128.2, 127.9, 107.0, 78.9, 64.8, 64.5, 48.2, 43.4, 39.4, 38.6, 35.1; HPLC analysis (Chiralpak AS-H column, hexane: 2-propanol = 85:15, flow rate = 1.0 mL/min, wavelength = 210 nm): Rt = 18.04 (minor) and 26.60 min (major), syn/anti = 90/10, 85% ee.



## 2.3 $^1\text{H}$ NMR and $^{13}\text{C}$ NMR Spectra of all compounds

### 2.3.1 The spectra of compound 3SR

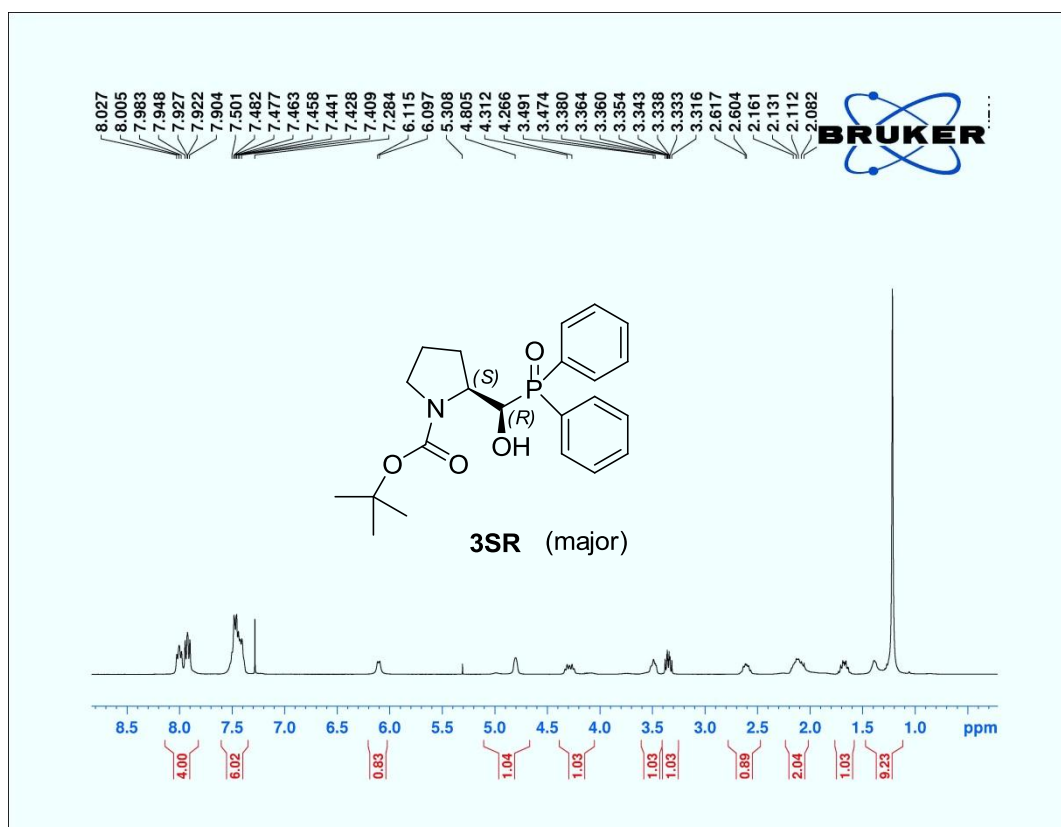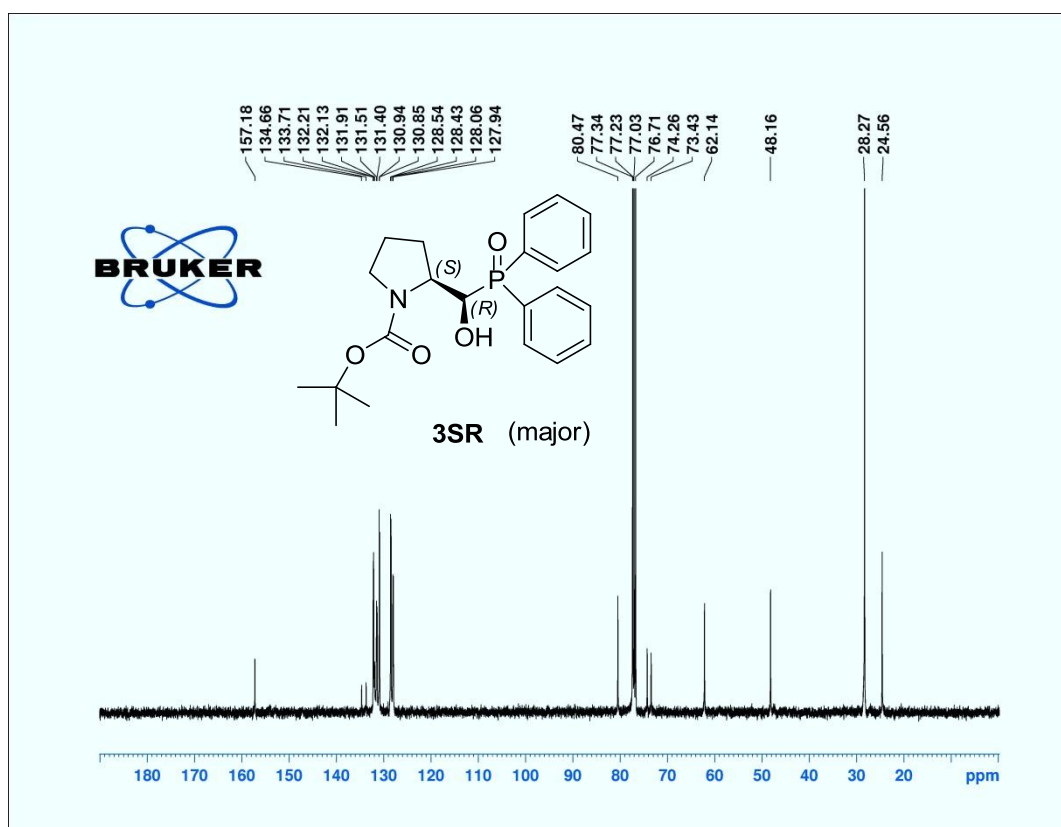

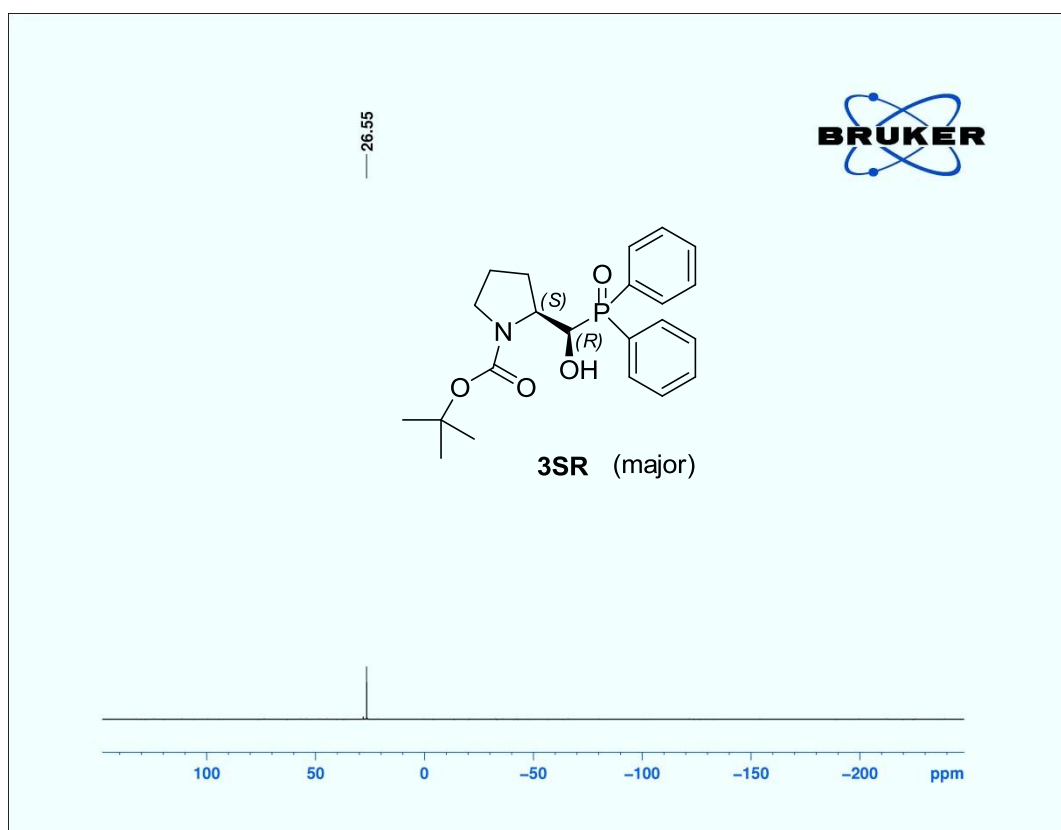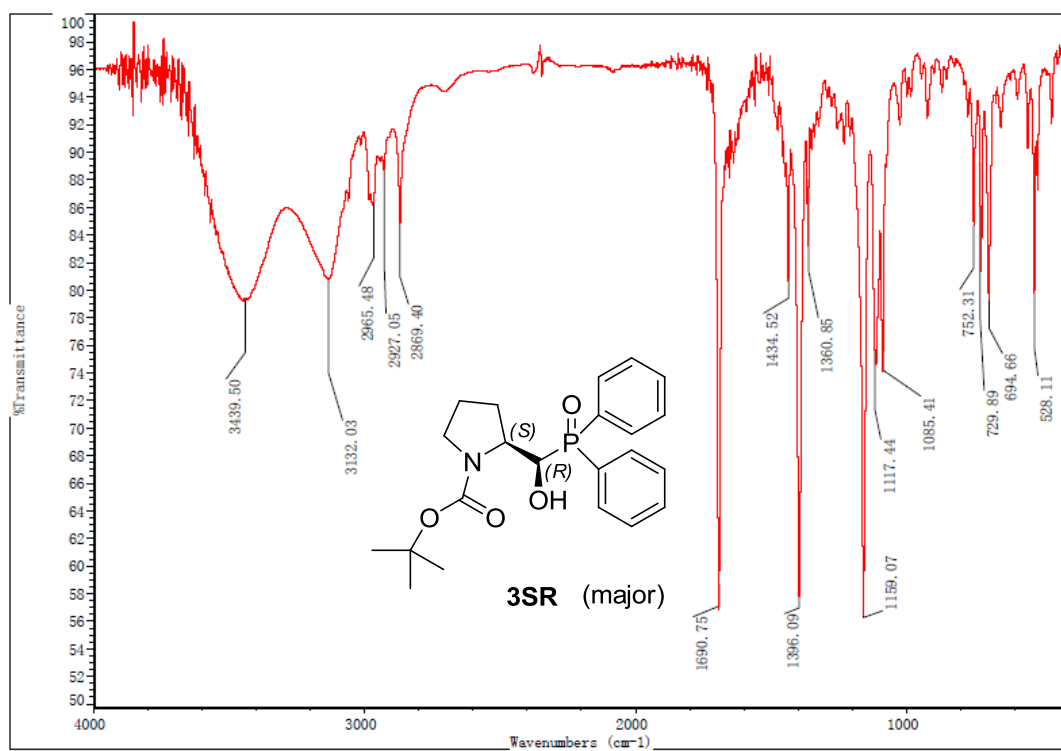

### 2.3.2 The spectra of compound 4

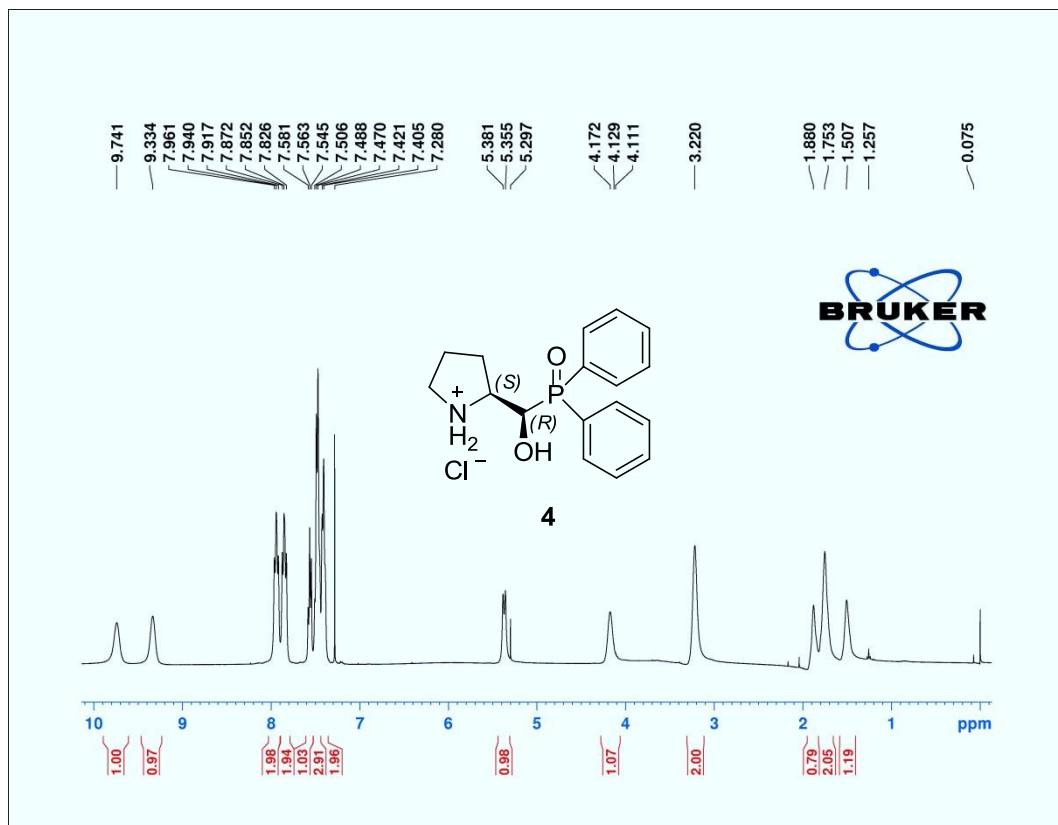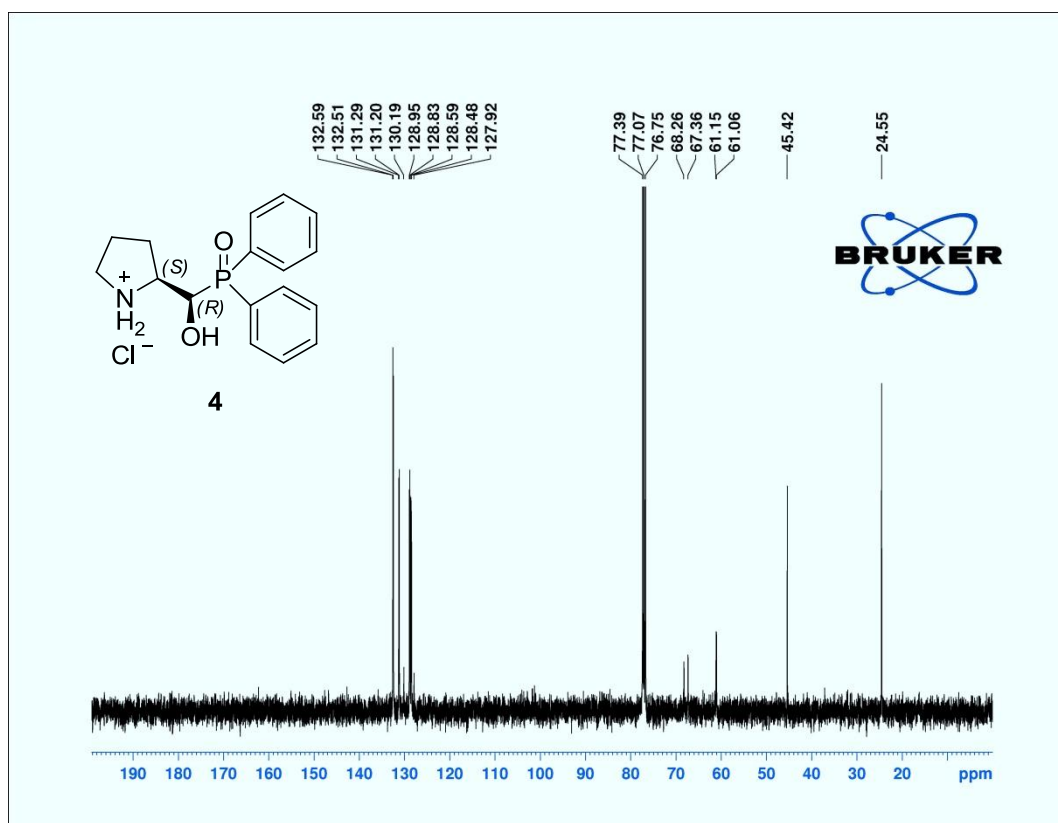

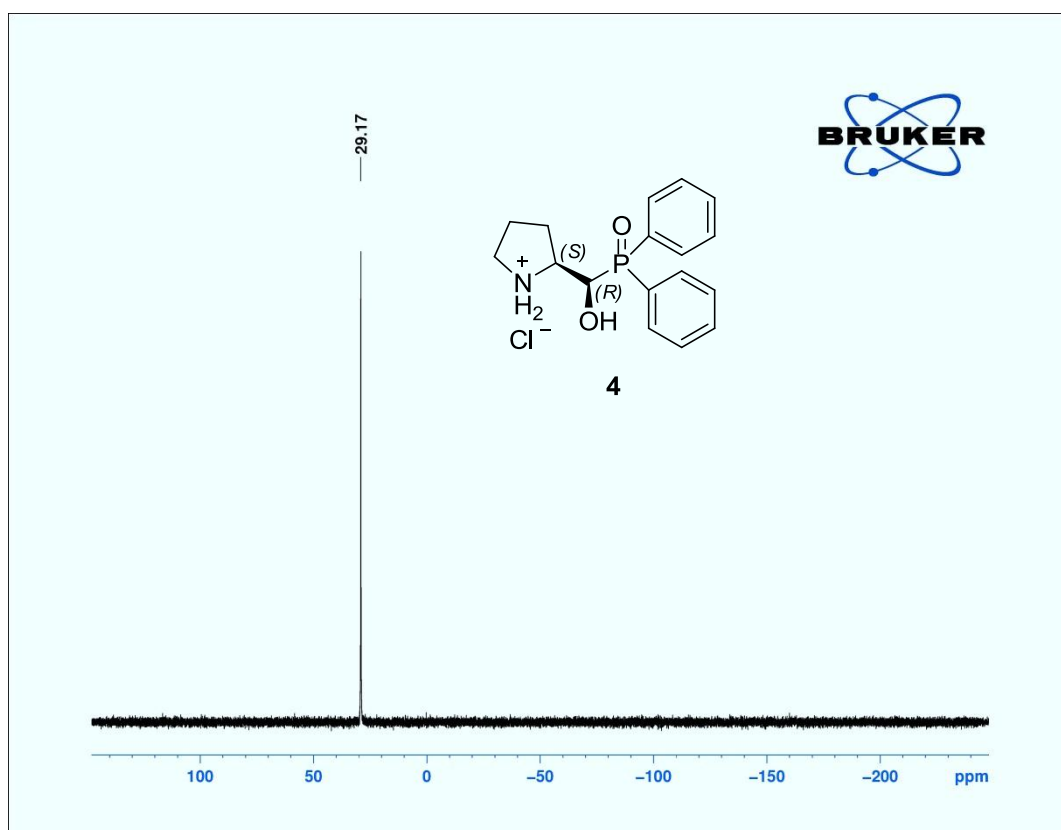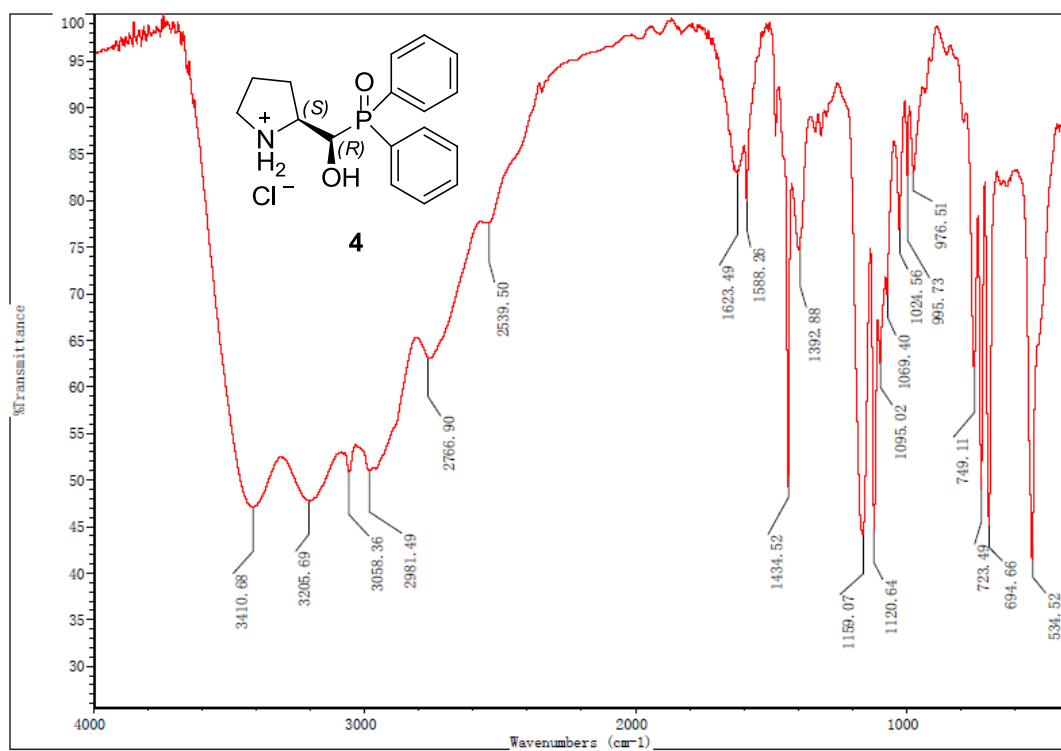

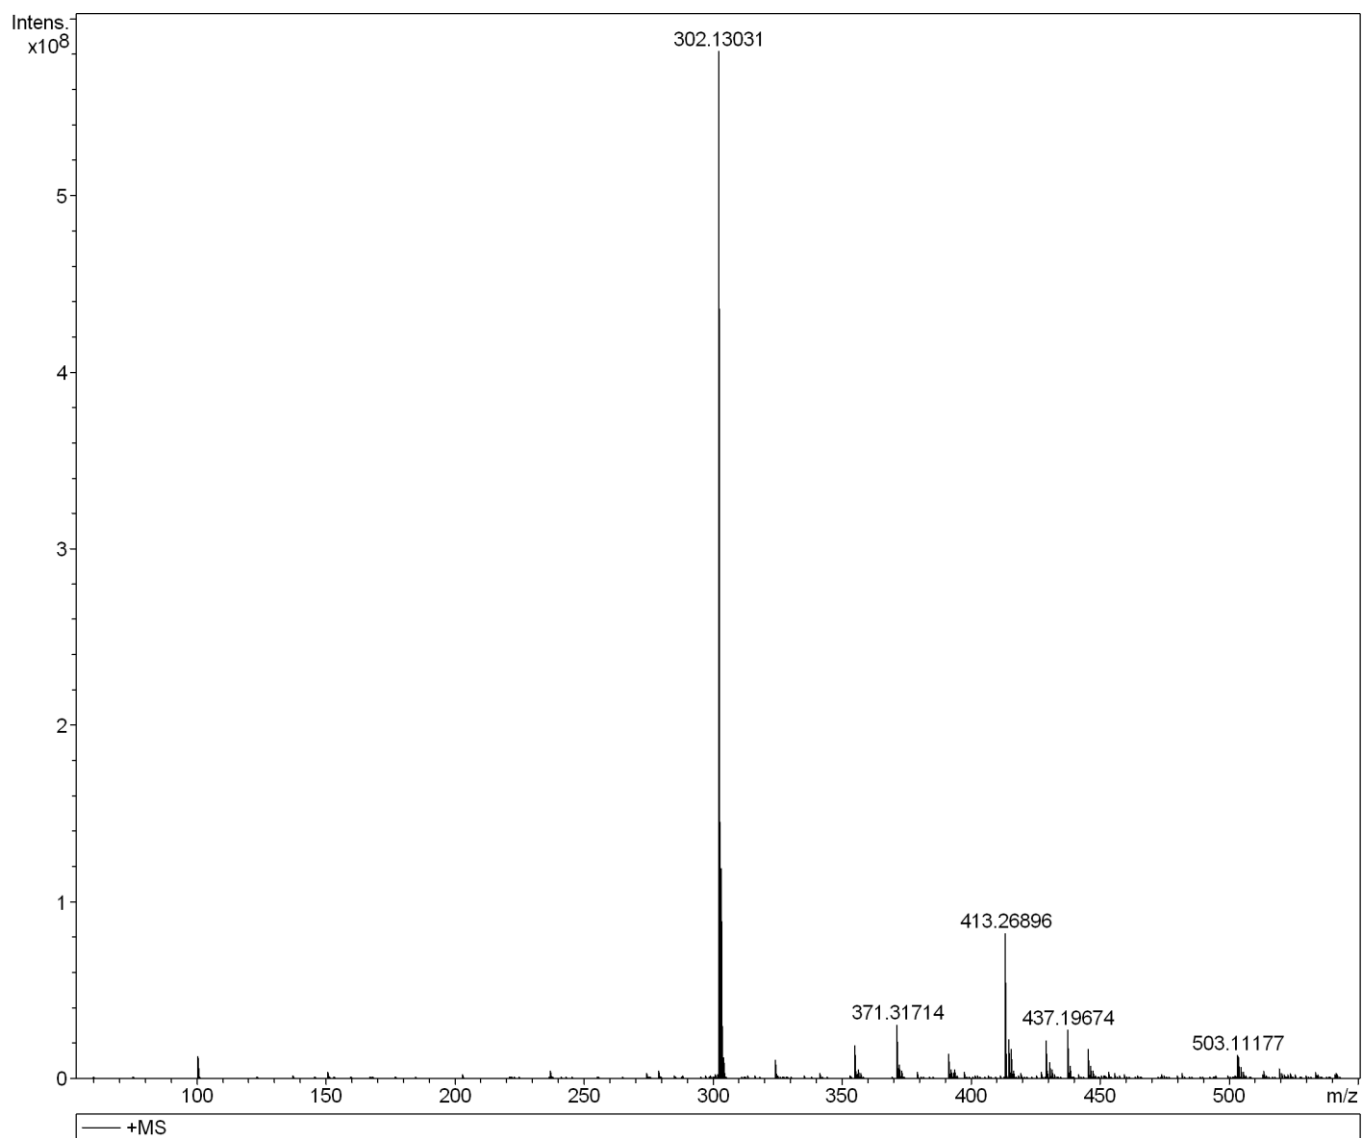

### 2.3.3 The spectra of compound 5

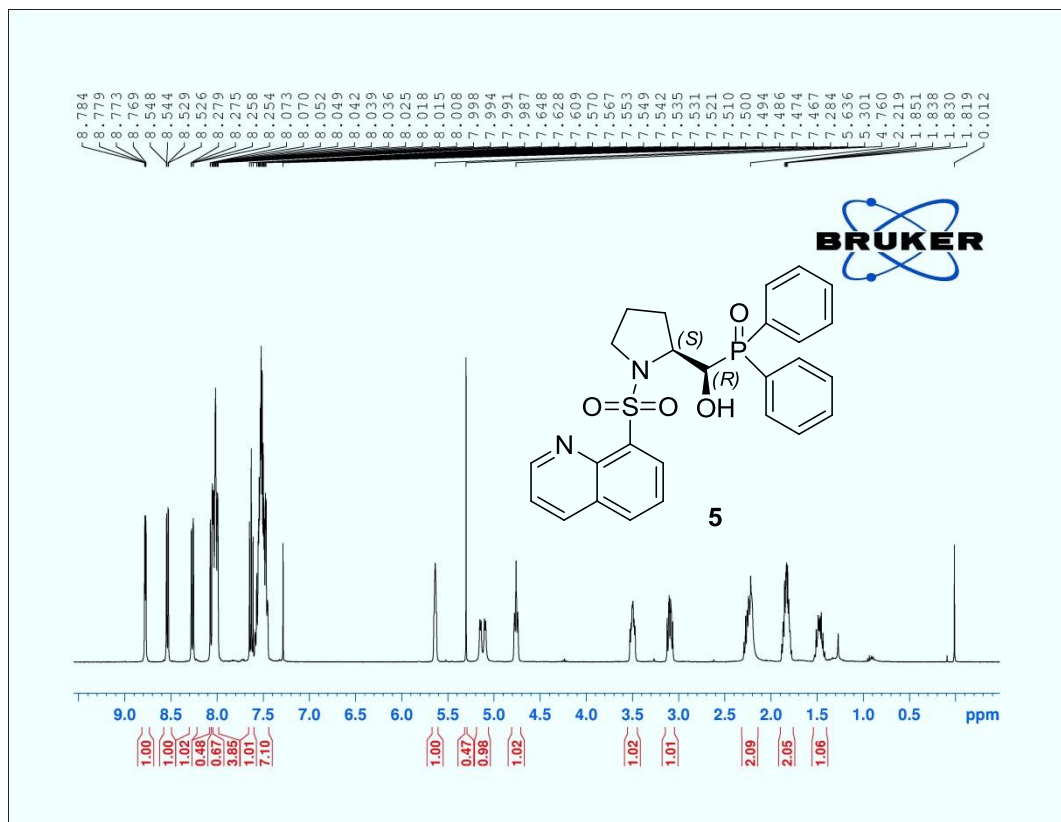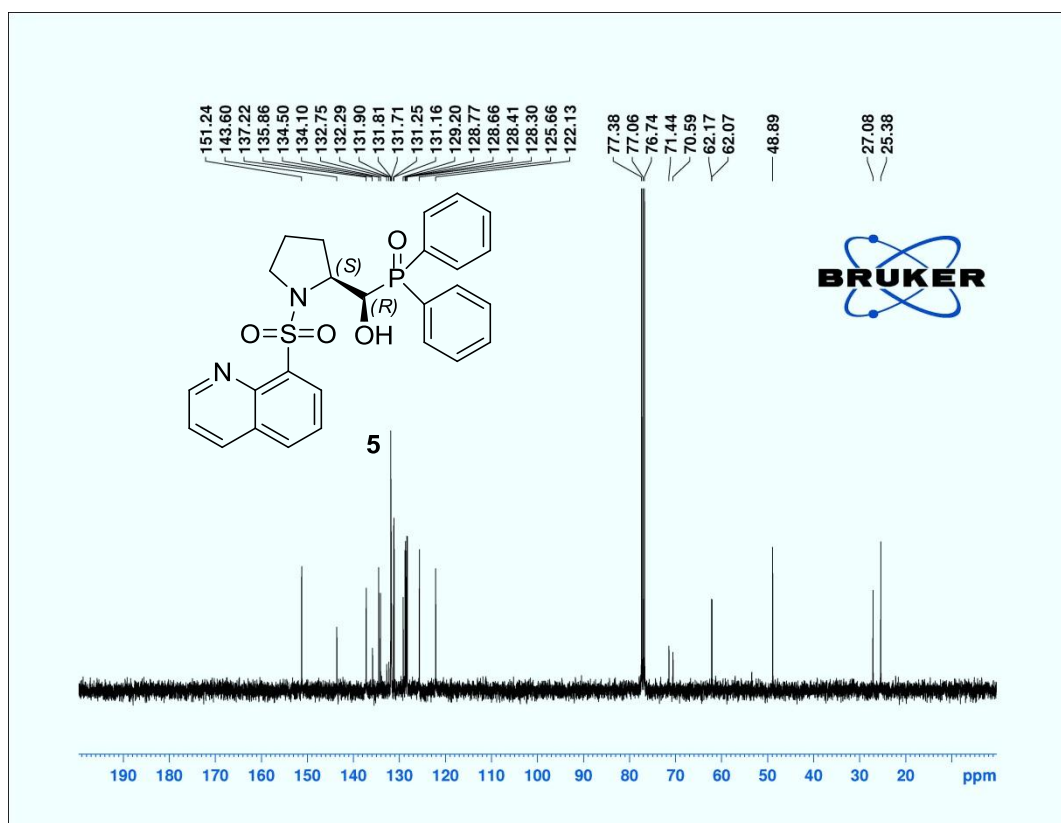

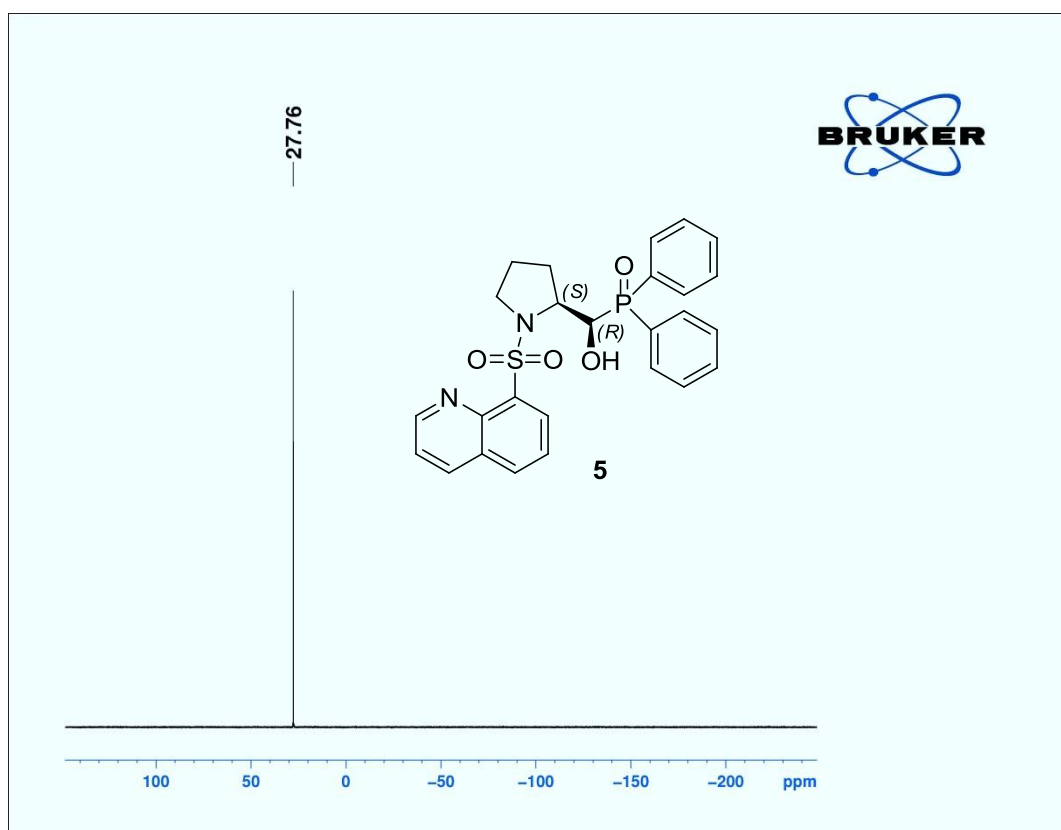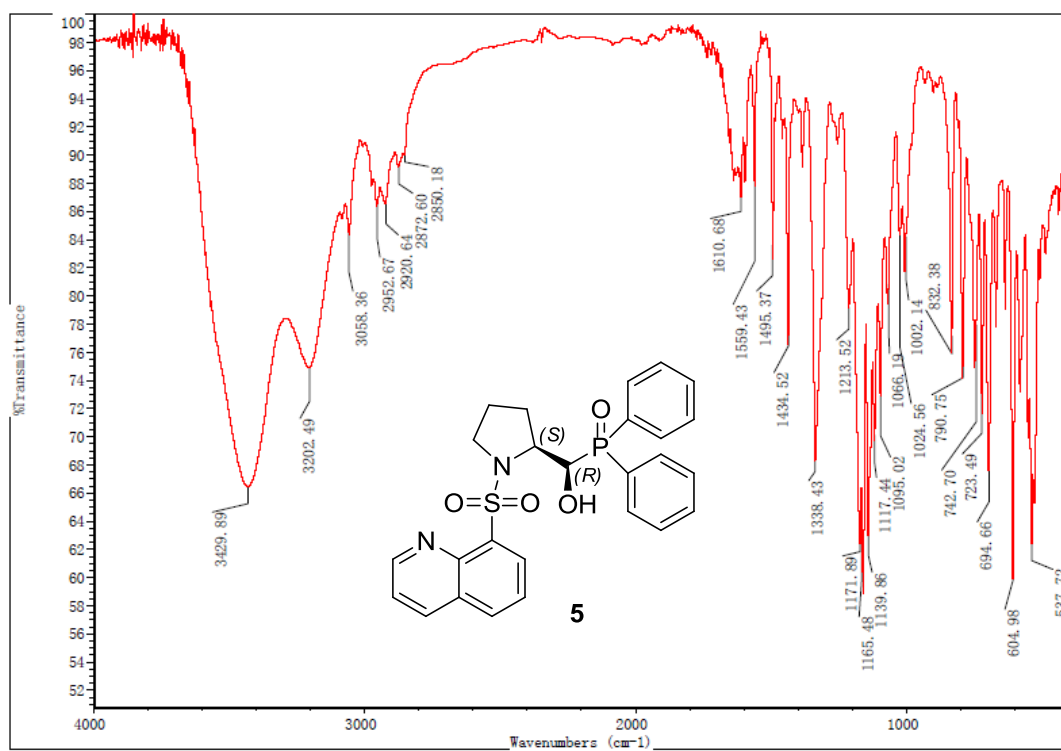



### 2.3.4 The spectra of compound 3a

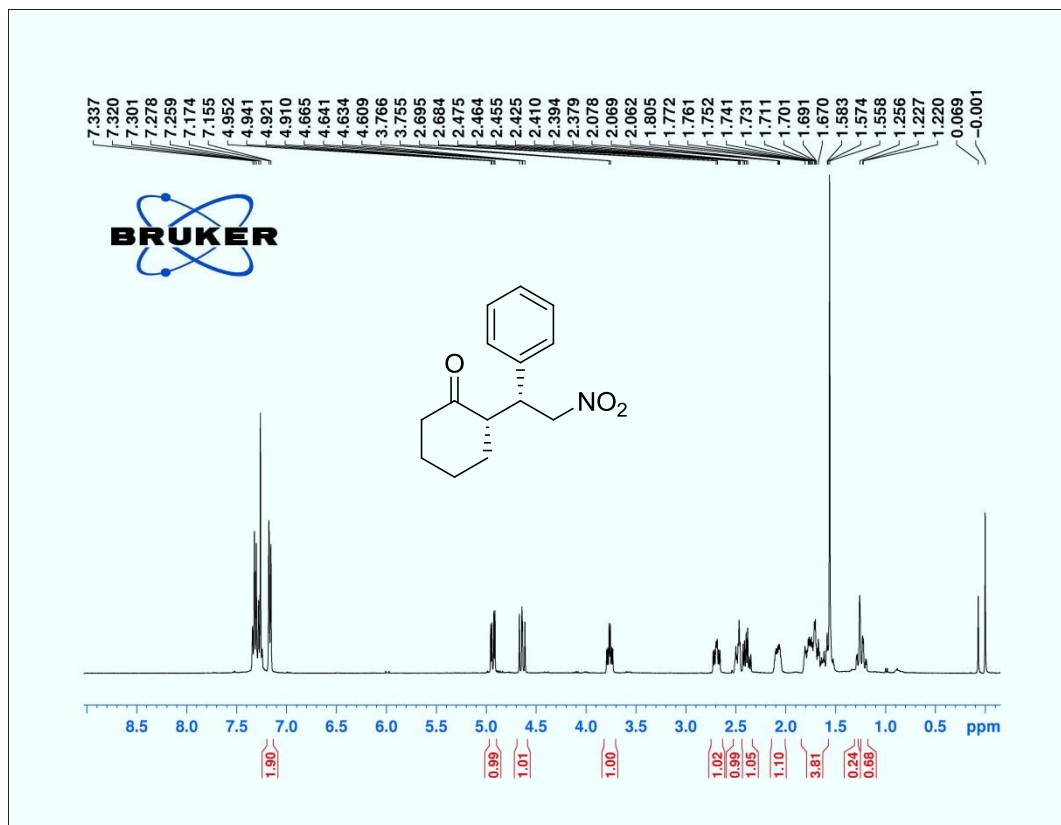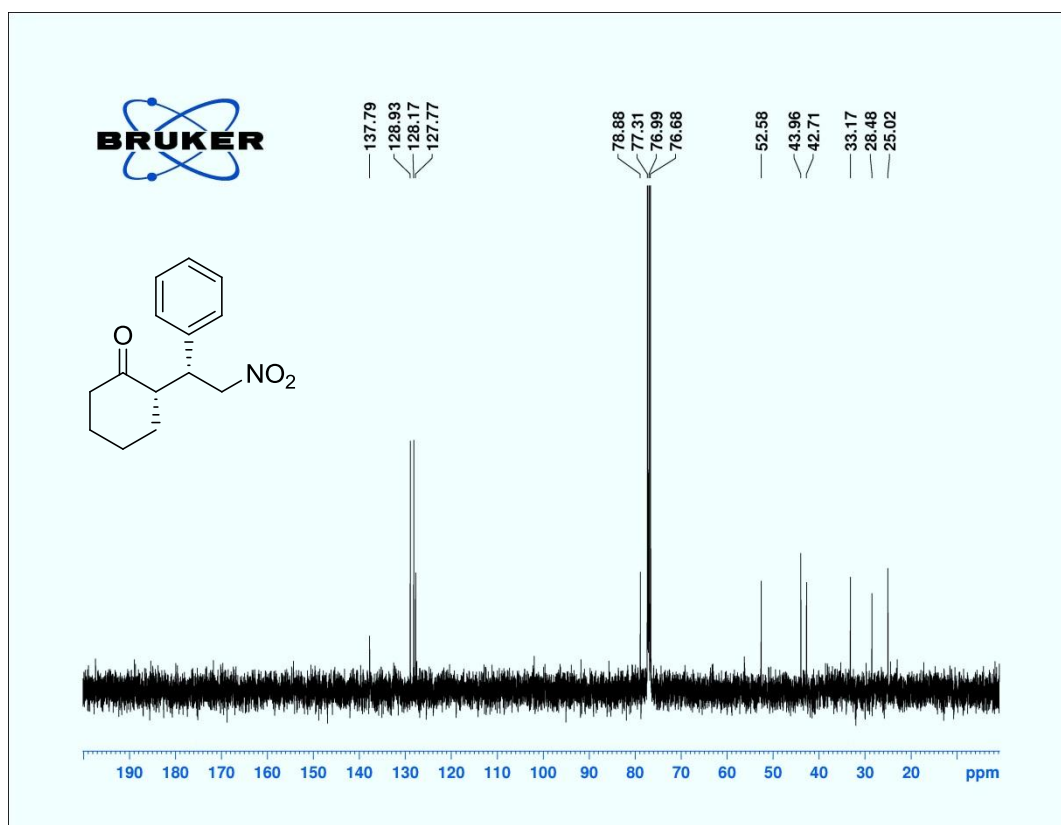

### 2.3.5 The spectra of compound 3b

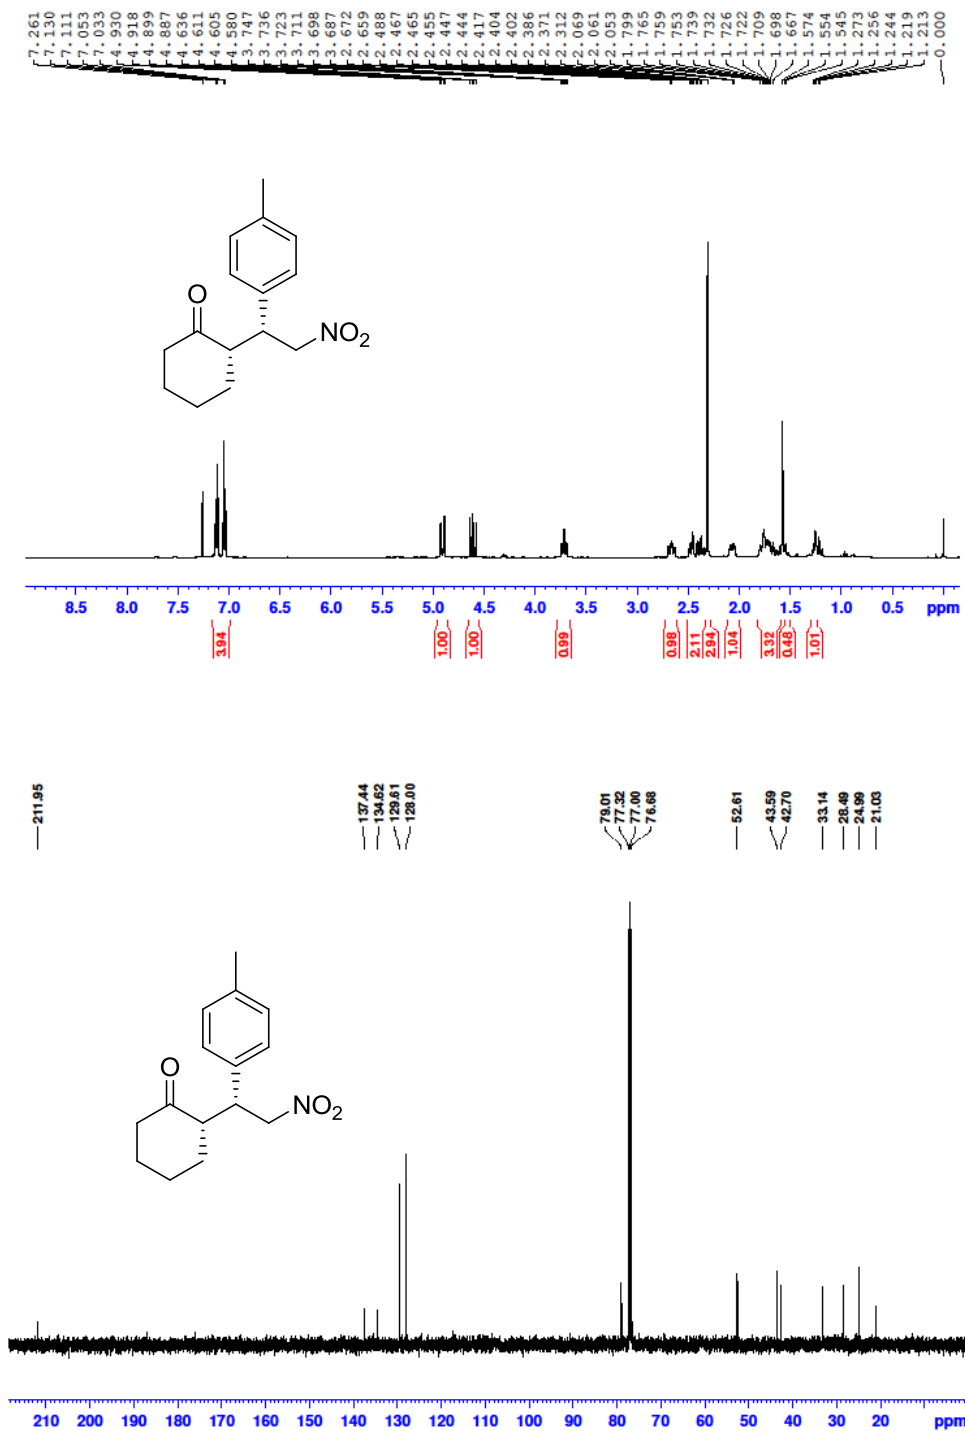

### 2.3.6 The spectra of compound 3c

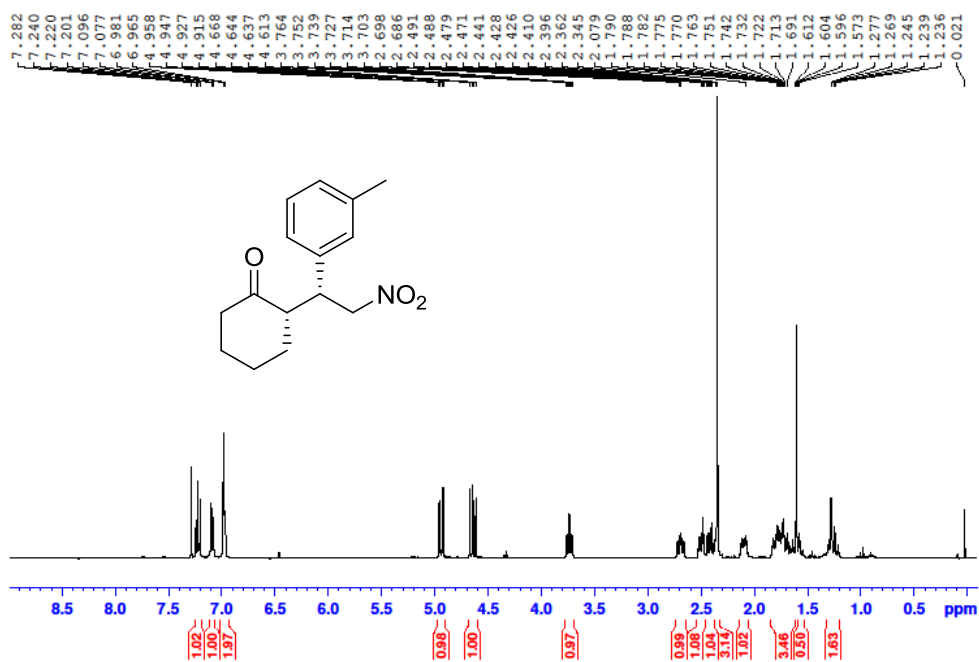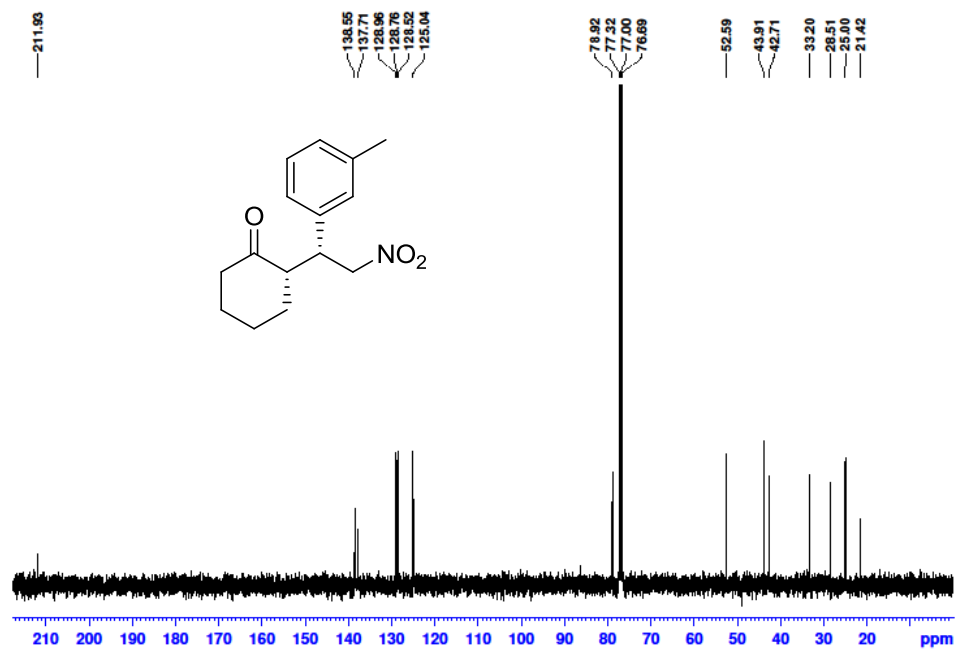

### 2.3.7 The spectra of compound 3d

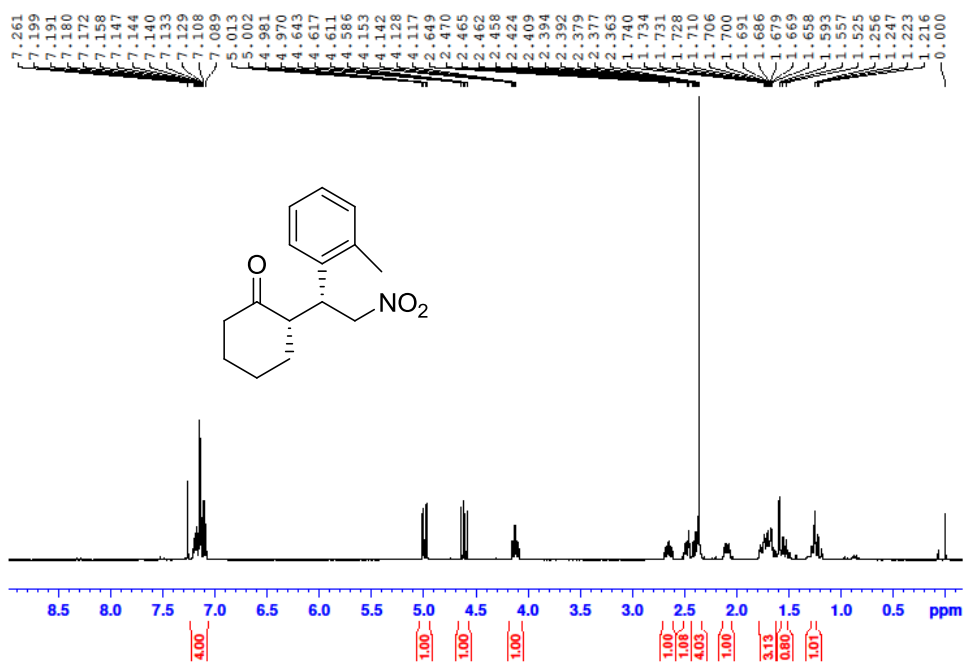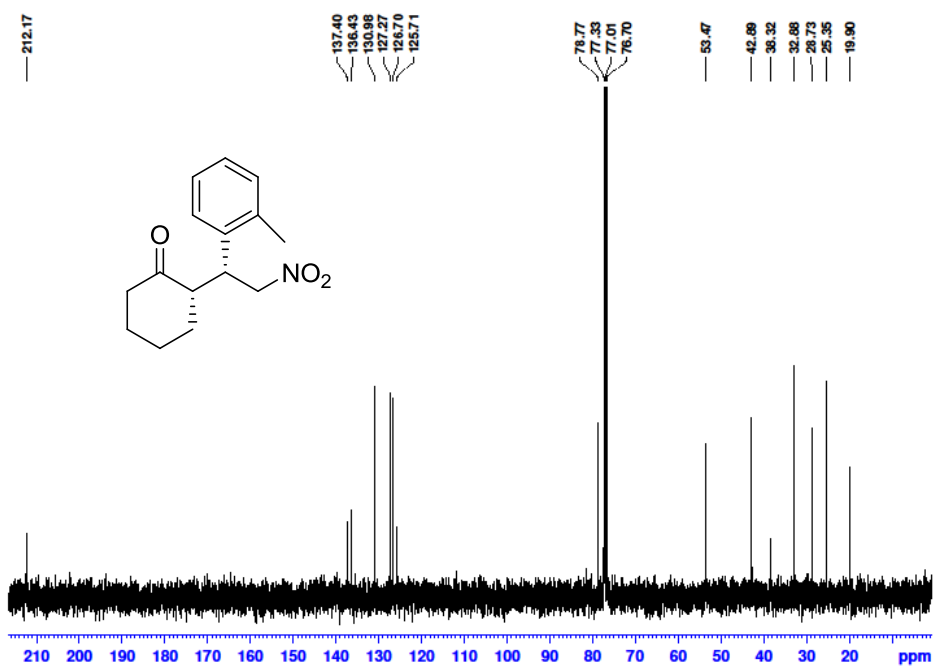

### 2.3.8 The spectra of compound 3e

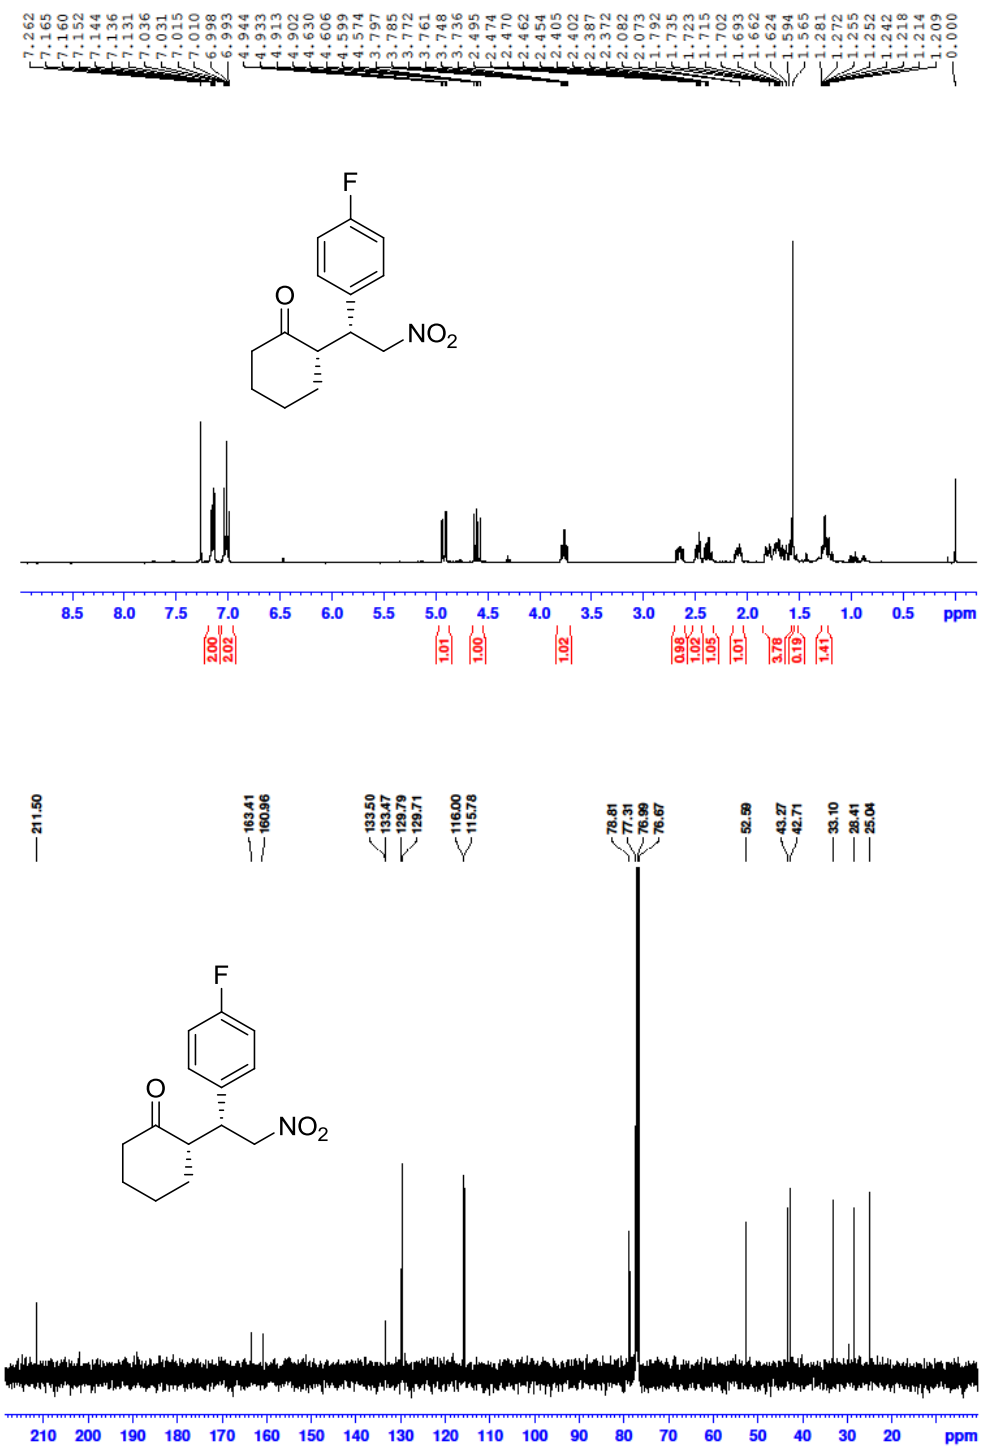

### 2.3.9 The spectra of compound 3f

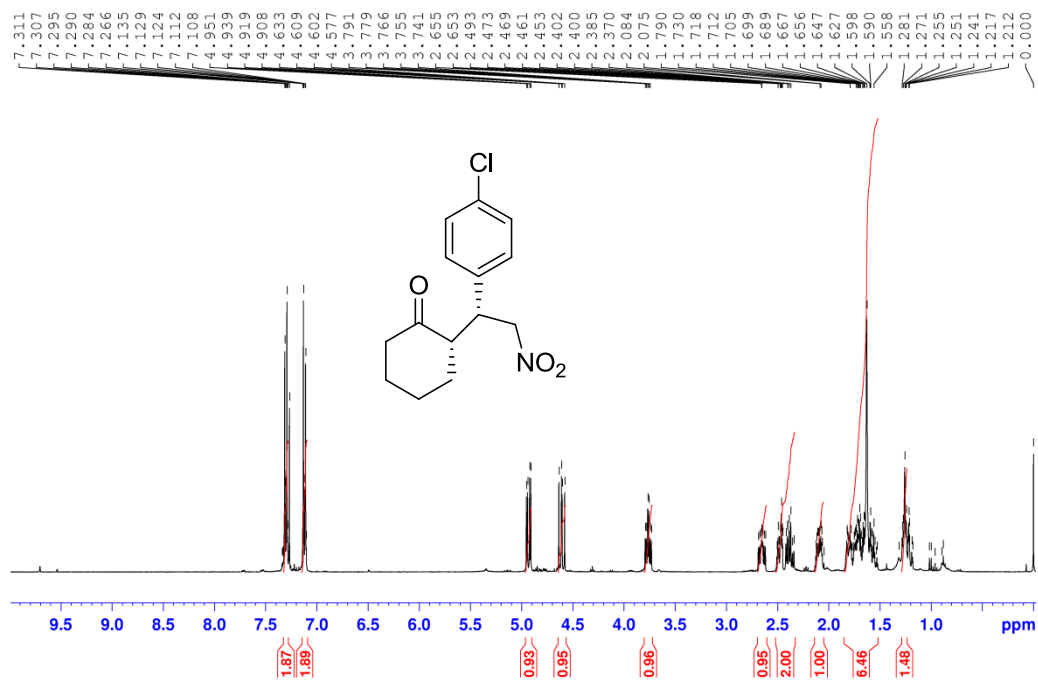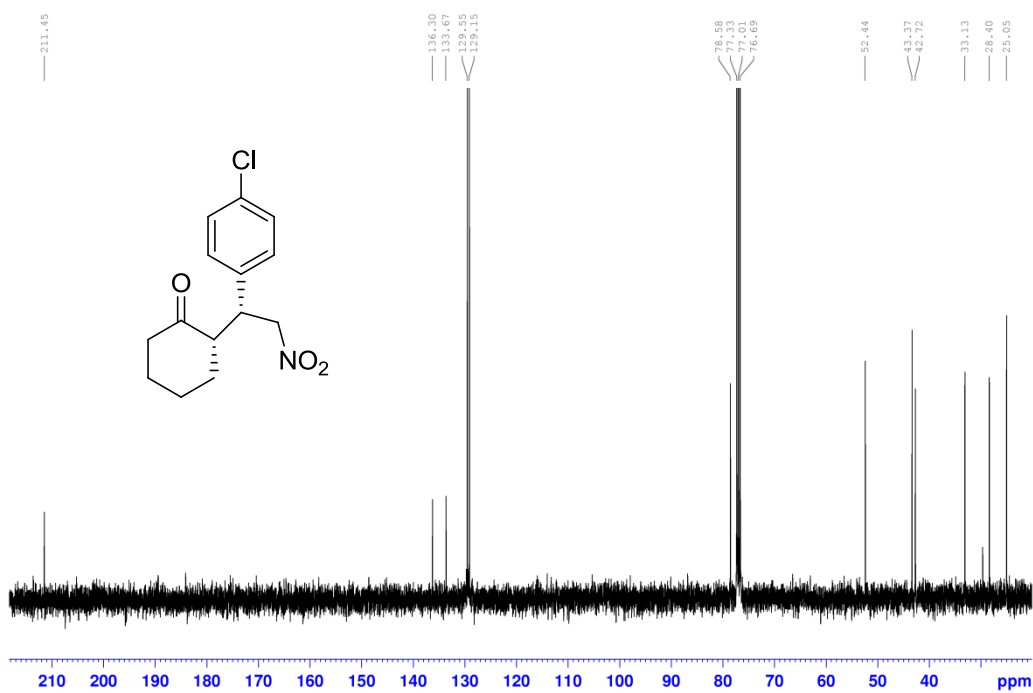

### 2.3.10 The spectra of compound 3g

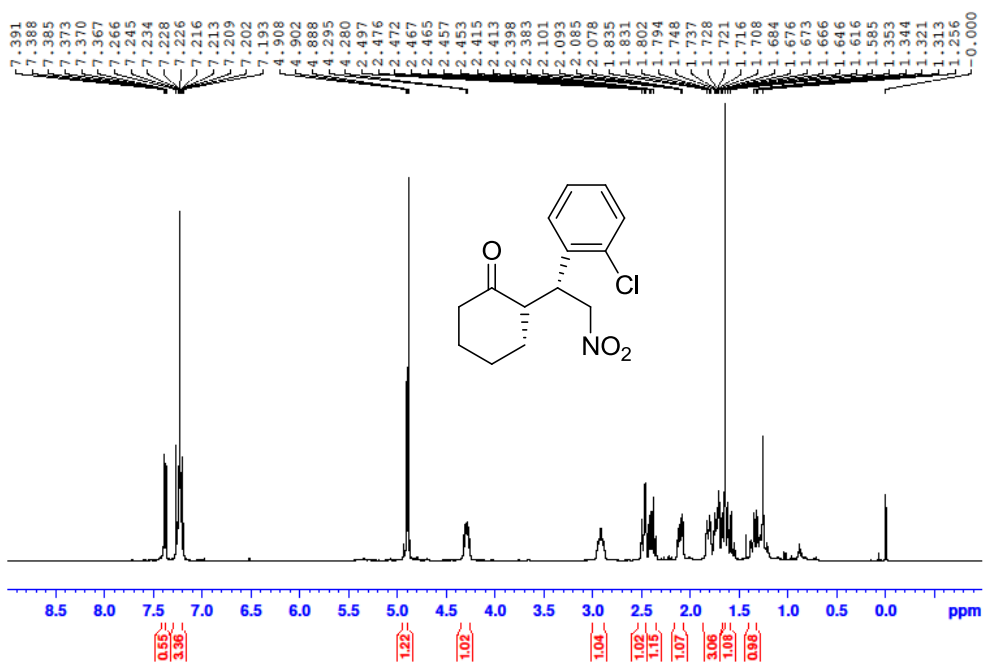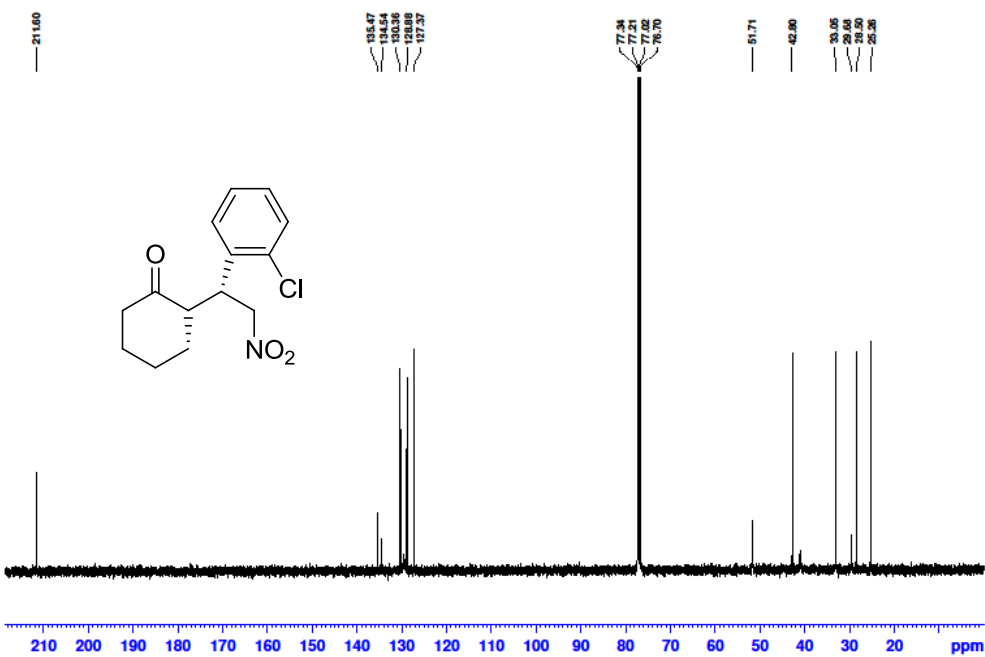



### 2.3.11 The spectra of compound 3h

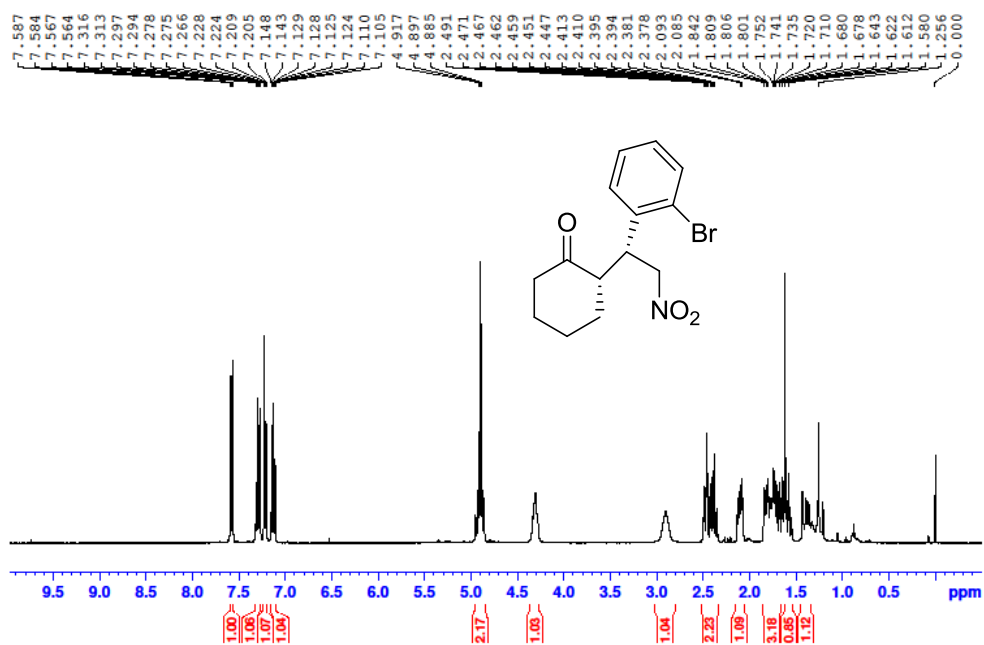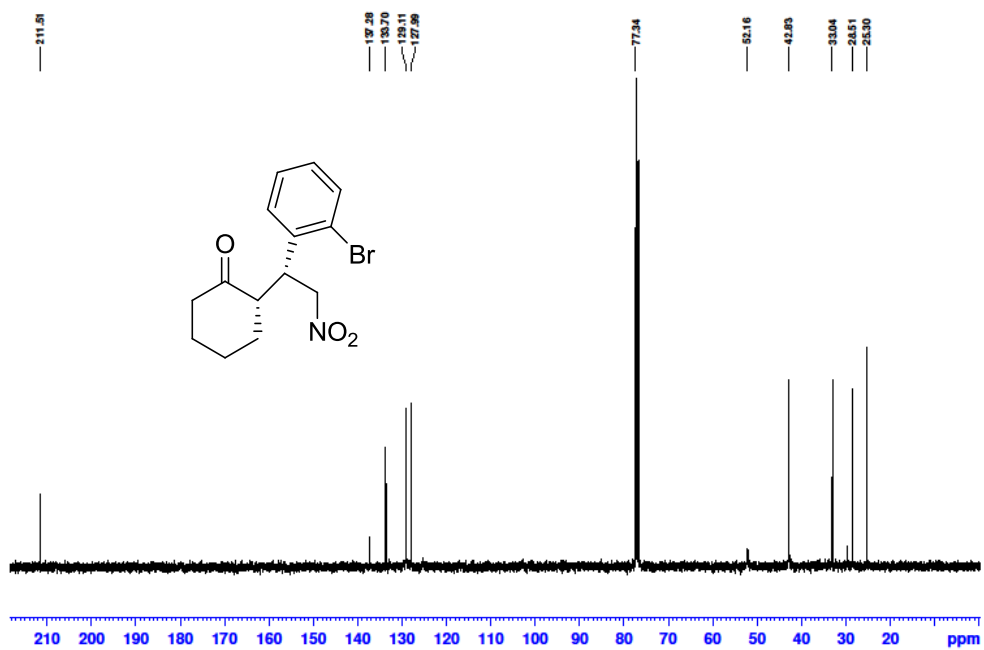

### 2.3.12 The spectra of compound 3i

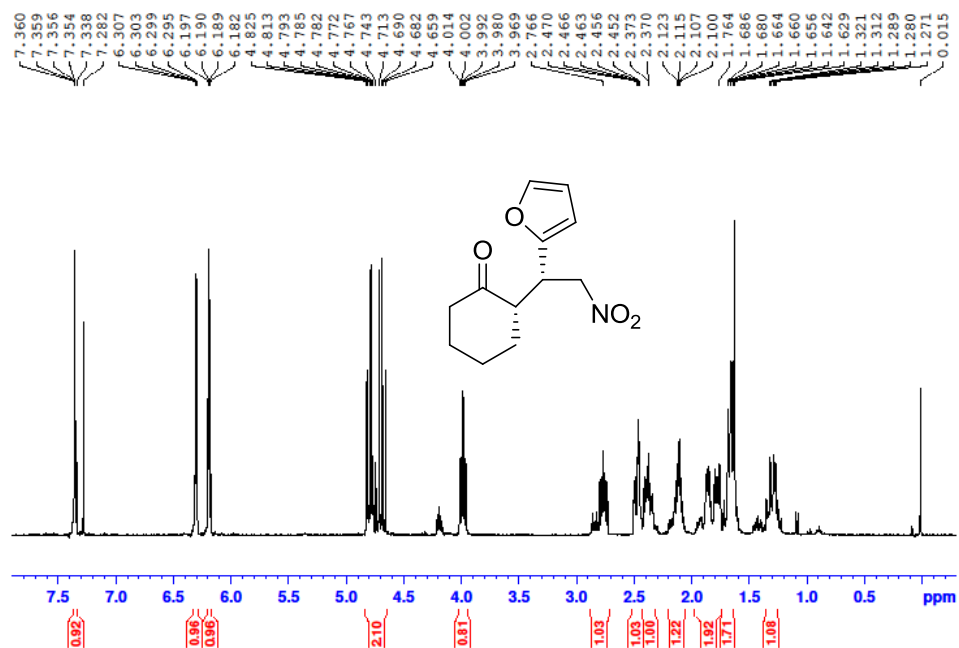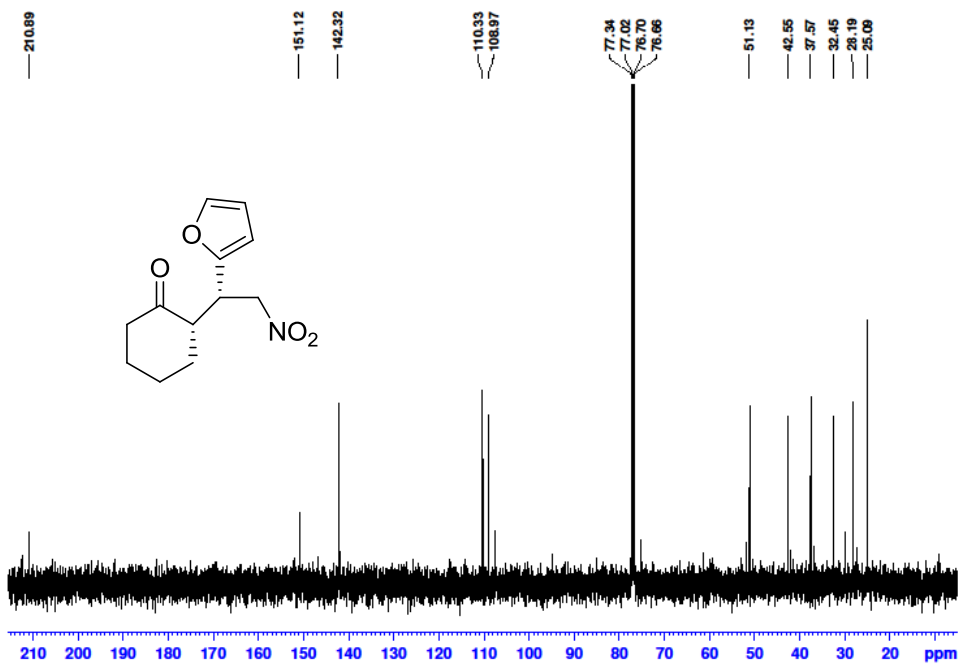

### 2.3.13 The spectra of compound 3j

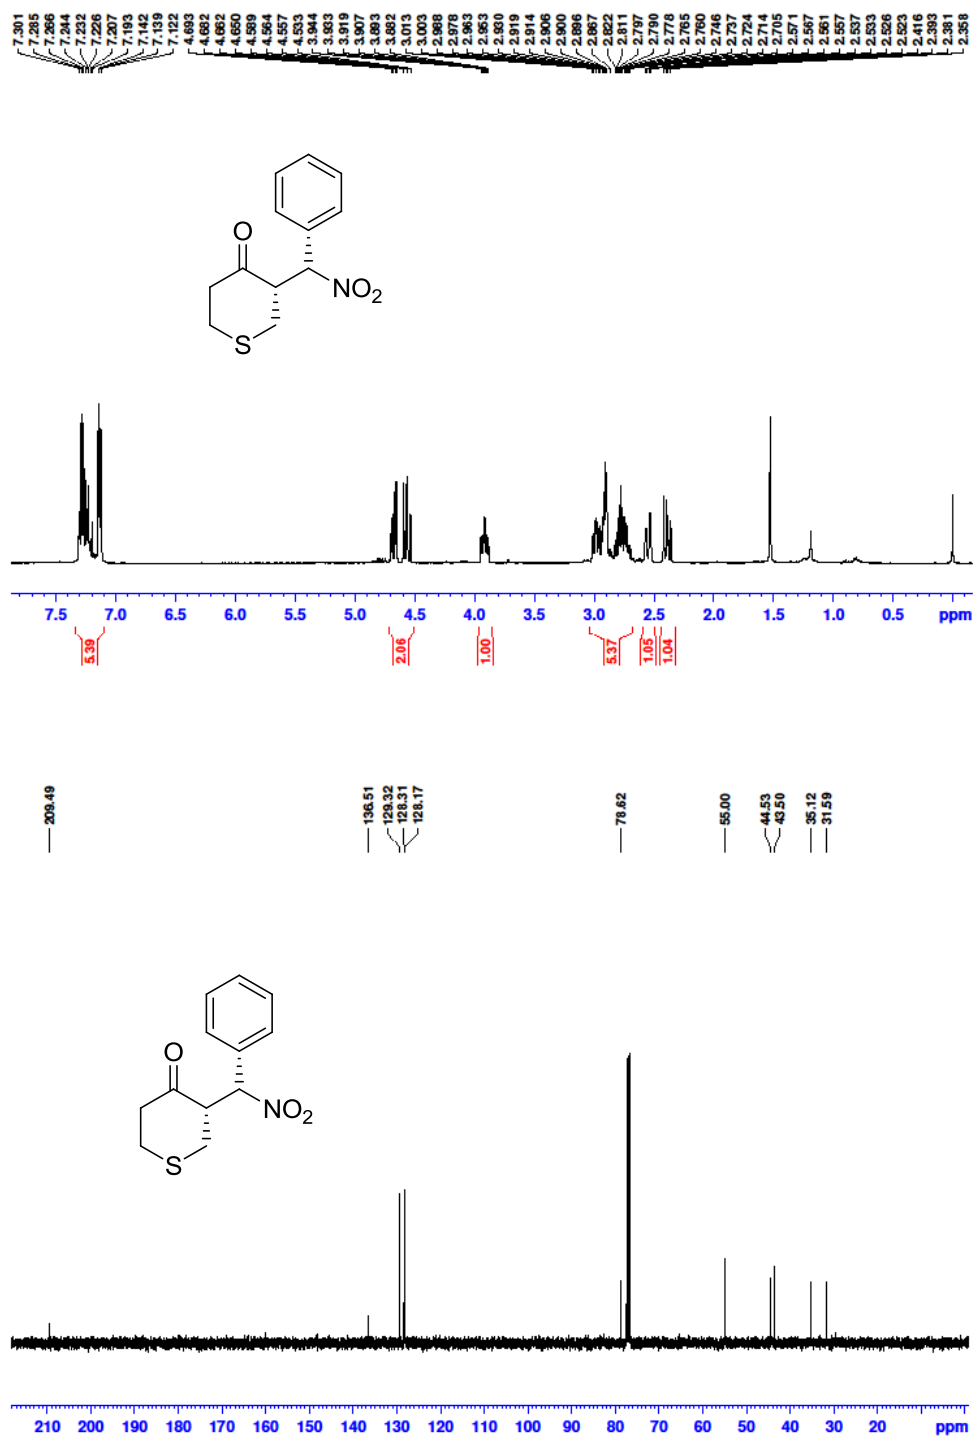

### 2.3.14 The spectra of compound 3k

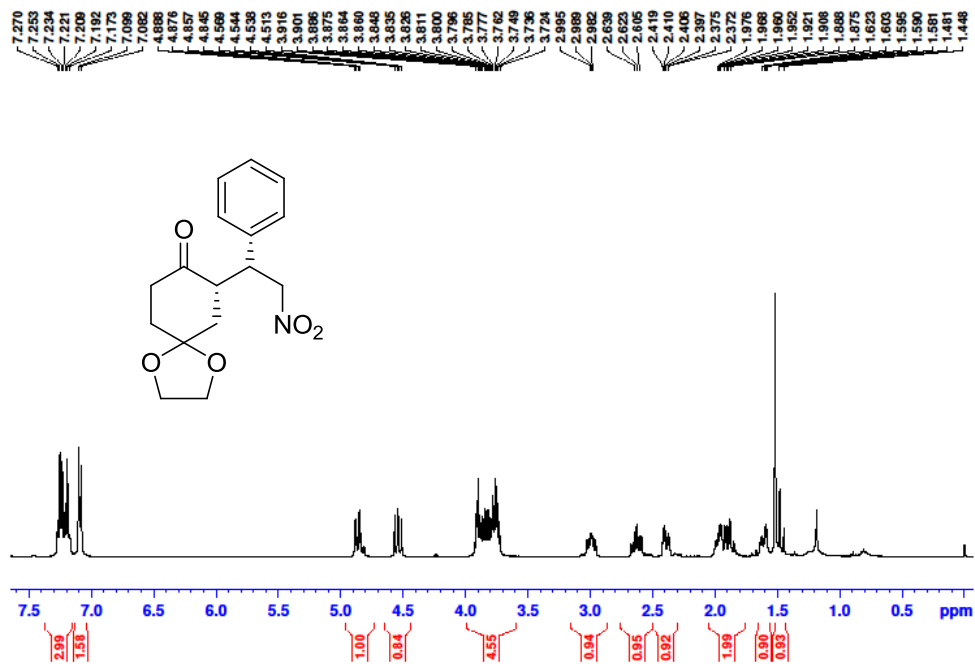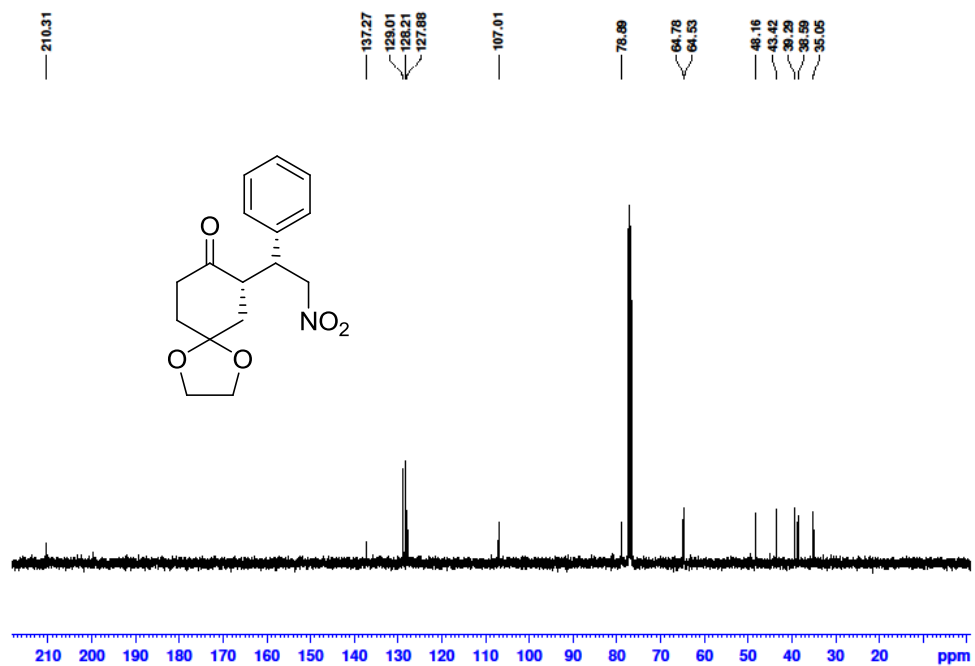

## 2.4 The X-ray data of compound 5

Table 1. Crystal data and structure refinement for 5.

| Empirical formula                 | C <sub>26</sub> H <sub>25</sub> N <sub>2</sub> O <sub>4</sub> P S                                                   |
|-----------------------------------|---------------------------------------------------------------------------------------------------------------------|
| Formula weight                    | 492.13                                                                                                              |
| Temperature                       | 173(2) K                                                                                                            |
| Wavelength                        | 0.71073 Å                                                                                                           |
| Crystal system, space group       | Monoclinic, 2/mB                                                                                                    |
| Unit cell dimensions              | a = 8.494(2) Å    alpha = 90 deg.<br>b = 11.250(3) Å    beta = 93.010(4) deg.<br>c = 14.974(4) Å    gamma = 90 deg. |
| Volume                            | 1429.0(6) Å <sup>3</sup>                                                                                            |
| Z, Calculated density             | 3, 1.504 Mg/m <sup>3</sup>                                                                                          |
| Absorption coefficient            | 0.291 mm <sup>-1</sup>                                                                                              |
| F(000)                            | 675                                                                                                                 |
| Crystal size                      | 0.90 x 0.33 x 0.09 mm                                                                                               |
| Theta range for data collection   | 1.36 to 28.34 deg.                                                                                                  |
| Limiting indices                  | -11 ≤ h ≤ 10, -14 ≤ k ≤ 14, -19 ≤ l ≤ 19                                                                            |
| Reflections collected / unique    | 12400 / 6483 [R(int) = 0.0350]                                                                                      |
| Completeness to theta = 25        | 95.9 %                                                                                                              |
| Absorption correction             | Semi-empirical from equivalents                                                                                     |
| Max. and min. transmission        | 0.9743 and 0.7797                                                                                                   |
| Refinement method                 | Full-matrix least-squares on F <sup>2</sup>                                                                         |
| Data / restraints / parameters    | 6483 / 1 / 307                                                                                                      |
| Goodness-of-fit on F <sup>2</sup> | 1.716                                                                                                               |
| Final R indices [I > 2σ(I)]       | R1 = 0.1423, wR2 = 0.3780                                                                                           |
| R indices (all data)              | R1 = 0.1469, wR2 = 0.3844                                                                                           |
| Absolute structure parameter      | 0.1(2)                                                                                                              |
| Largest diff. peak and hole       | 4.565 and -0.774 e.Å <sup>-3</sup>                                                                                  |

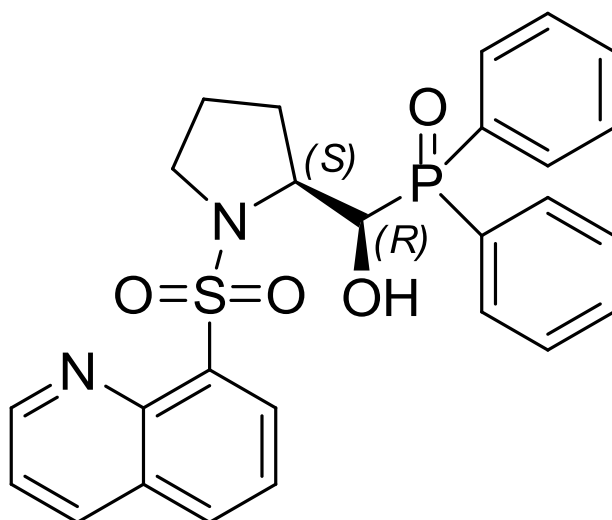

Table 2. Bond lengths [Å] and angles [deg] for sad.

|              |           |                    |           |
|--------------|-----------|--------------------|-----------|
| P(1)-O(6)    | 1.485(5)  | C(8)-C(12)-P(1)    | 110.7(4)  |
| P(1)-C(1)    | 1.783(6)  | O(2)-C(12)-H(12A)  | 108.6     |
| P(1)-C(9)    | 1.786(6)  | C(8)-C(12)-H(12A)  | 108.6     |
| P(1)-C(12)   | 1.812(6)  | P(1)-C(12)-H(12A)  | 108.6     |
| S(2)-O(4)    | 1.399(5)  | C(31)-C(13)-C(1)   | 119.8(7)  |
| S(2)-O(5)    | 1.425(6)  | C(31)-C(13)-H(13A) | 120.1     |
| S(2)-N(3)    | 1.602(6)  | C(1)-C(13)-H(13A)  | 120.1     |
| S(2)-C(7)    | 1.747(8)  | C(30)-C(14)-C(15)  | 117.3(13) |
| C(1)-C(13)   | 1.383(10) | C(30)-C(14)-C(25)  | 122.9(12) |
| C(1)-C(11)   | 1.401(10) | C(15)-C(14)-C(25)  | 119.4(10) |
| O(2)-C(12)   | 1.405(7)  | N(16)-C(15)-C(14)  | 123.7(9)  |
| O(2)-H(2A)   | 0.8200    | N(16)-C(15)-C(7)   | 119.1(7)  |
| N(3)-C(26)   | 1.427(9)  | C(14)-C(15)-C(7)   | 117.2(9)  |
| N(3)-C(8)    | 1.487(9)  | C(27)-N(16)-C(15)  | 119.1(11) |
| C(7)-C(19)   | 1.354(11) | C(18)-C(17)-C(9)   | 117.8(8)  |
| C(7)-C(15)   | 1.447(10) | C(18)-C(17)-H(17A) | 121.1     |
| C(8)-C(10)   | 1.529(9)  | C(9)-C(17)-H(17A)  | 121.1     |
| C(8)-C(12)   | 1.531(8)  | C(22)-C(18)-C(17)  | 124.3(10) |
| C(8)-H(8A)   | 0.9800    | C(22)-C(18)-H(18A) | 117.8     |
| C(9)-C(20)   | 1.396(9)  | C(17)-C(18)-H(18A) | 117.8     |
| C(9)-C(17)   | 1.399(10) | C(7)-C(19)-C(21)   | 120.4(10) |
| C(10)-C(29)  | 1.458(11) | C(7)-C(19)-H(19A)  | 119.8     |
| C(10)-H(10A) | 0.9700    | C(21)-C(19)-H(19A) | 119.8     |
| C(10)-H(10B) | 0.9700    | C(33)-C(20)-C(9)   | 119.8(8)  |
| C(11)-C(28)  | 1.374(11) | C(33)-C(20)-H(20A) | 120.1     |
| C(11)-H(11A) | 0.9300    | C(9)-C(20)-H(20A)  | 120.1     |
| C(12)-H(12A) | 0.9800    | C(25)-C(21)-C(19)  | 123.8(11) |
| C(13)-C(31)  | 1.383(10) | C(25)-C(21)-H(21A) | 118.1     |
| C(13)-H(13A) | 0.9300    | C(19)-C(21)-H(21A) | 118.1     |
| C(14)-C(30)  | 1.373(18) | C(18)-C(22)-C(33)  | 118.6(8)  |
| C(14)-C(15)  | 1.421(14) | C(18)-C(22)-H(22A) | 120.7     |
| C(14)-C(25)  | 1.467(18) | C(33)-C(22)-H(22A) | 120.7     |
| C(15)-N(16)  | 1.328(12) | C(31)-C(24)-C(28)  | 119.7(7)  |
| N(16)-C(27)  | 1.264(12) | C(31)-C(24)-H(24A) | 120.1     |
| C(17)-C(18)  | 1.352(11) | C(28)-C(24)-H(24A) | 120.1     |
| C(17)-H(17A) | 0.9300    | C(21)-C(25)-C(14)  | 119.1(10) |
| C(18)-C(22)  | 1.330(14) | C(21)-C(25)-H(25A) | 120.5     |
| C(18)-H(18A) | 0.9300    | C(14)-C(25)-H(25A) | 120.5     |
| C(19)-C(21)  | 1.407(15) | N(3)-C(26)-C(29)   | 102.3(6)  |

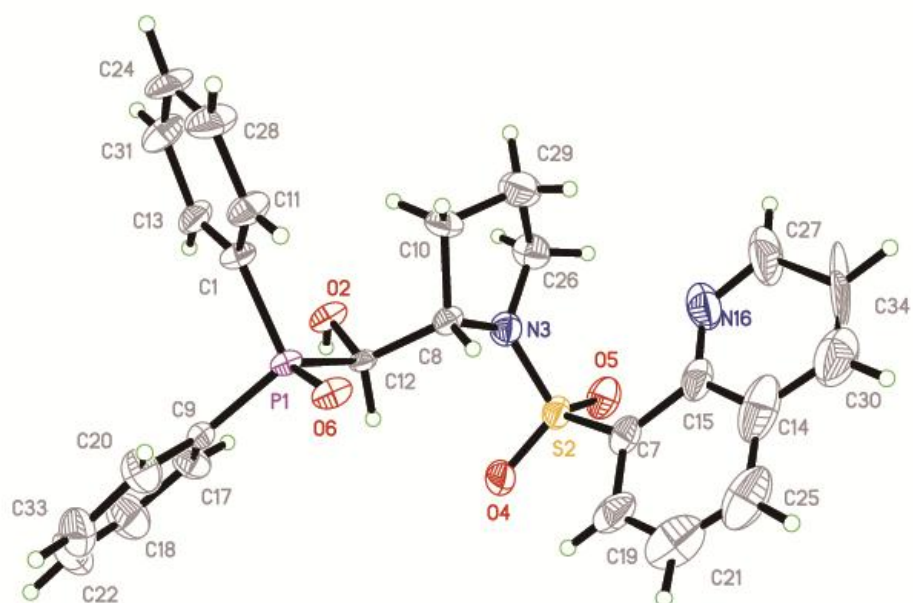

Figure. ORTEP drawing showing 50% probability displacement ellipsoids of compound 5

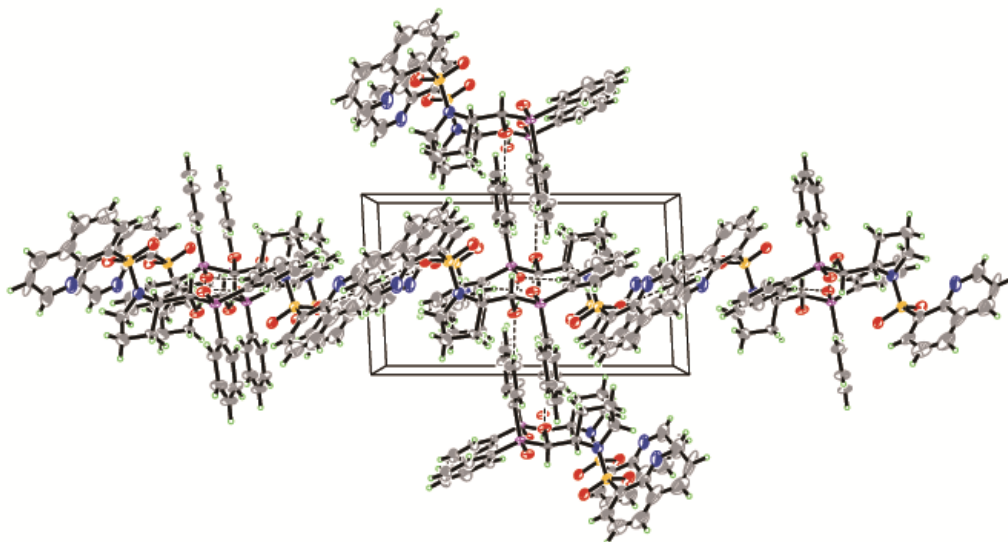

Figure. The cell crystal structure of compound 5



## 2.5 The HPLC Spectra of all compounds 3a~3k

### 2.5.1 The HPLC Spectra of compound 3a

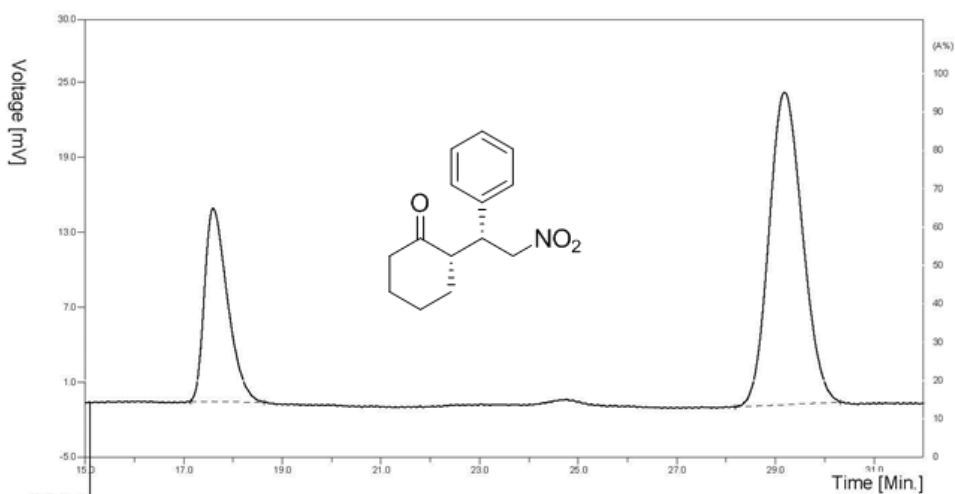

Peak Table

| Peak# | Ret. Time(min) | Height(mV) | Area(mv.sec) | Area%   |
|-------|----------------|------------|--------------|---------|
| 1     | 17.59          | 15.46      | 502.83       | 29.9459 |
| 2     | 29.18          | 24.98      | 1176.30      | 70.0541 |
| Total |                | 40.44      | 1679.13      | 100     |

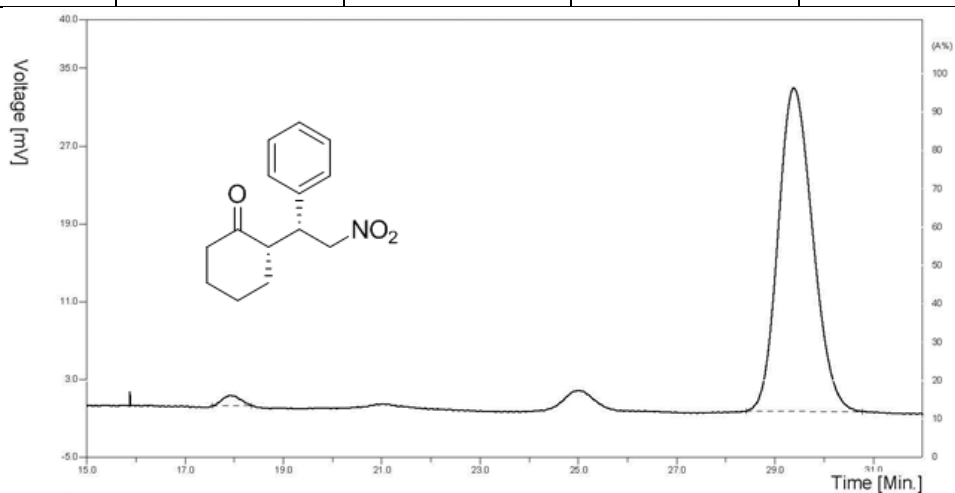

Peak Table

| Peak# | Ret. Time(min) | Height(mV) | Area(mv.sec) | Area%   |
|-------|----------------|------------|--------------|---------|
| 1     | 17.91          | 1.07       | 26.99        | 1.6381  |
| 2     | 29.38          | 33.26      | 1620.69      | 98.3619 |
| Total |                | 34.33      | 1647.68      | 100     |

## 2.5.2 The HPLC Spectra of compound 3b<sup>[11]</sup>

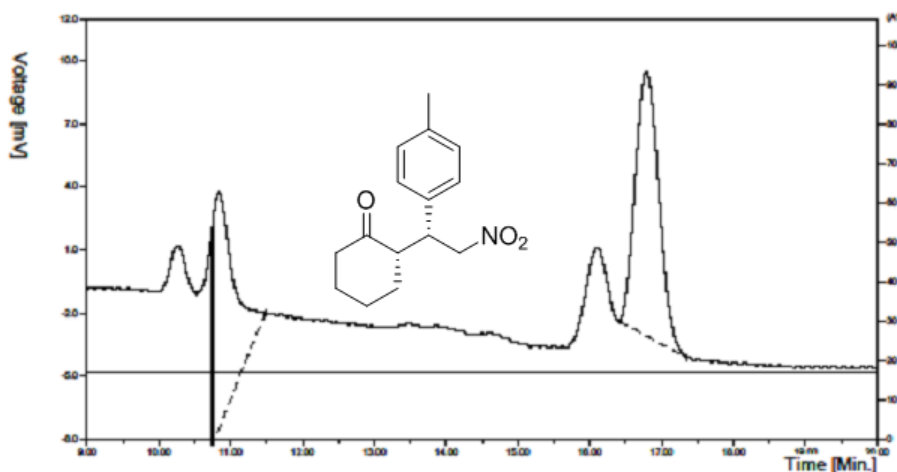

Peak Table

| Peak# | Ret. Time(min) | Height(mV) | Area(mv.sec) | Area%   |
|-------|----------------|------------|--------------|---------|
| 1     | 10.84          | 5.08       | 79.84        | 21.8054 |
| 2     | 16.79          | 12.54      | 286.30       | 78.1946 |
| Total |                | 17.63      | 366.14       | 100     |

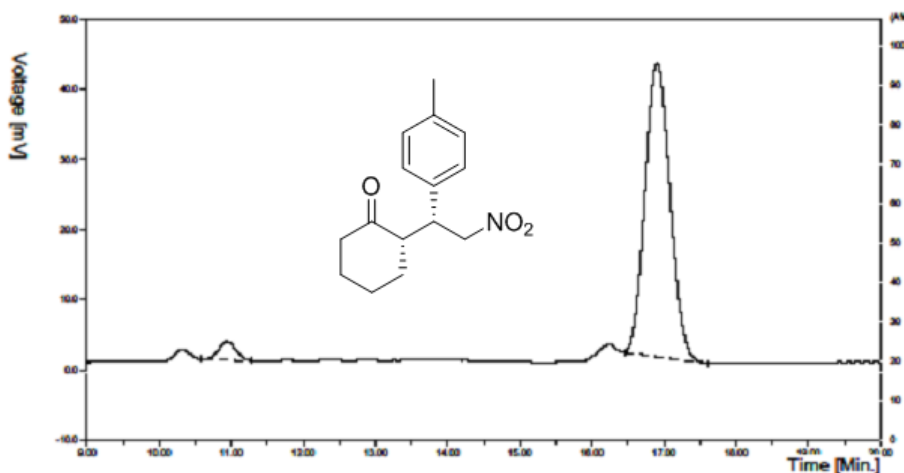

Peak Table

| Peak# | Ret. Time(min) | Height(mV) | Area(mv.sec) | Area%   |
|-------|----------------|------------|--------------|---------|
| 1     | 10.94          | 2.63       | 43.53        | 4.1444  |
| 2     | 16.91          | 41.85      | 1006.88      | 95.8556 |
| Total |                | 44.48      | 1050.41      | 100     |

The affected result of this overlapping peaks at ESI 2.6.2 will underestimate the area of the main peak at 16.91 min in our calculation(see: the cut line is upon the base line in the picture), which will also result in a little underestimate of the ee value of this case. That means the real ee value will exceed 91.7% if the two peaks is separated well enough.

### 2.5.3 The HPLC Spectra of compound 3c

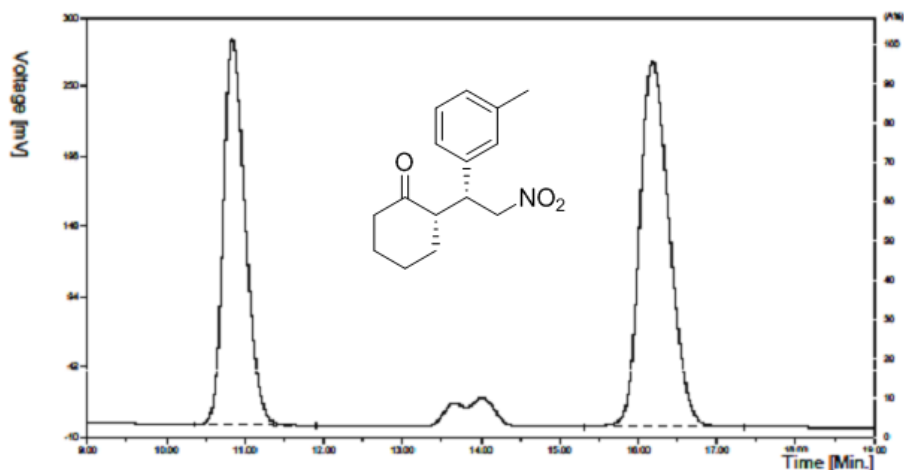

Peak Table

| Peak# | Ret. Time(min) | Height(mV) | Area(mv.sec) | Area%   |
|-------|----------------|------------|--------------|---------|
| 1     | 10.84          | 284.97     | 5494.66      | 43.5255 |
| 2     | 16.18          | 270.05     | 7129.35      | 56.4745 |
| Total |                | 555.02     | 12624.01     | 100     |

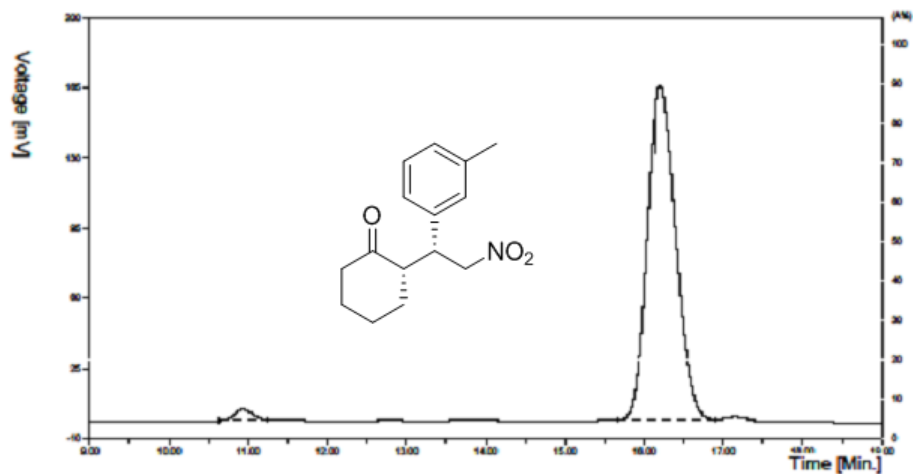

Peak Table

| Peak# | Ret. Time(min) | Height(mV) | Area(mv.sec) | Area%   |
|-------|----------------|------------|--------------|---------|
| 1     | 10.94          | 5.56       | 88.50        | 2.0994  |
| 2     | 16.20          | 167.00     | 4126.83      | 97.9006 |
| Total |                | 172.56     | 4215.33      | 100     |

### 2.5.4 The HPLC Spectra of compound 3d

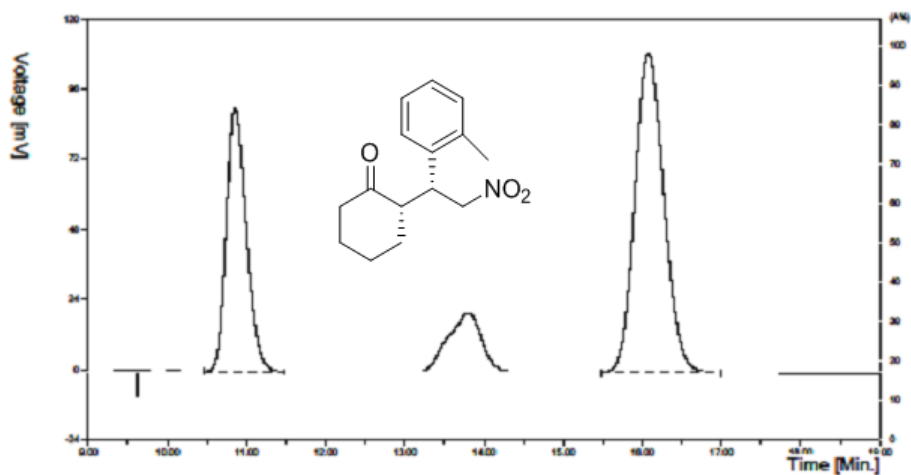

Peak Table

| Peak# | Ret. Time(min) | Height(mV) | Area(mv.sec) | Area%   |
|-------|----------------|------------|--------------|---------|
| 1     | 10.85          | 90.48      | 1611.47      | 36.6909 |
| 2     | 16.08          | 109.18     | 2780.54      | 63.3091 |
| Total |                | 199.66     | 4392.01      | 100     |

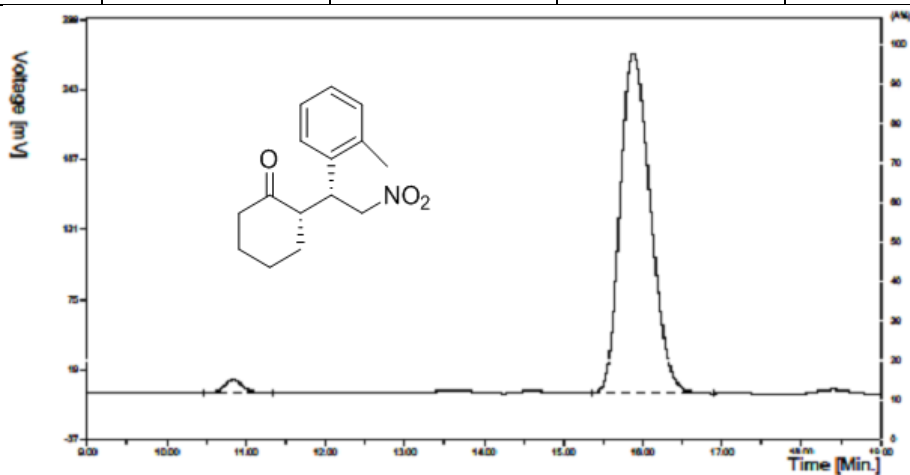

Peak Table

| Peak# | Ret. Time(min) | Height(mV) | Area(mv.sec) | Area%   |
|-------|----------------|------------|--------------|---------|
| 1     | 10.83          | 10.61      | 181.01       | 2.4496  |
| 2     | 15.88          | 271.83     | 7208.23      | 97.5504 |
| Total |                | 282.44     | 7389.24      | 100     |

### 2.5.5 The HPLC Spectra of compound 3e

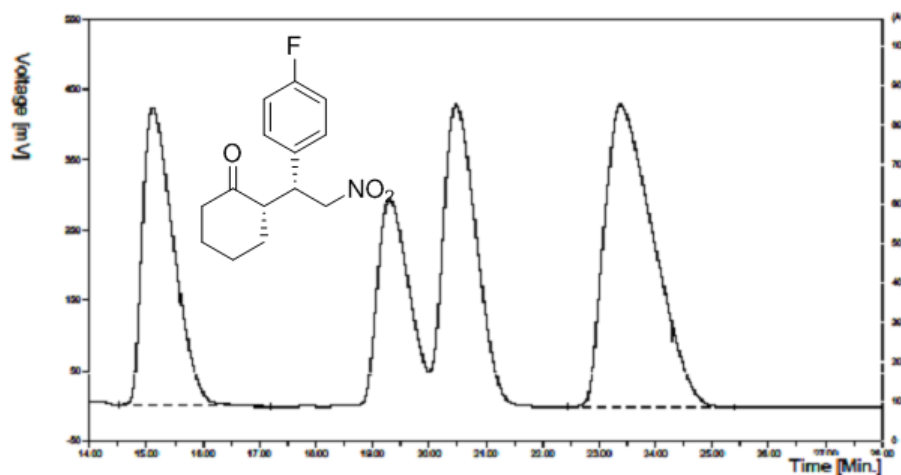

Peak Table

| Peak# | Ret. Time(min) | Height(mV) | Area(mv.sec) | Area%   |
|-------|----------------|------------|--------------|---------|
| 1     | 15.12          | 422.36     | 16180.57     | 38.3357 |
| 2     | 23.39          | 429.11     | 26027.04     | 61.6643 |
| Total |                | 851.47     | 42207.61     | 100     |

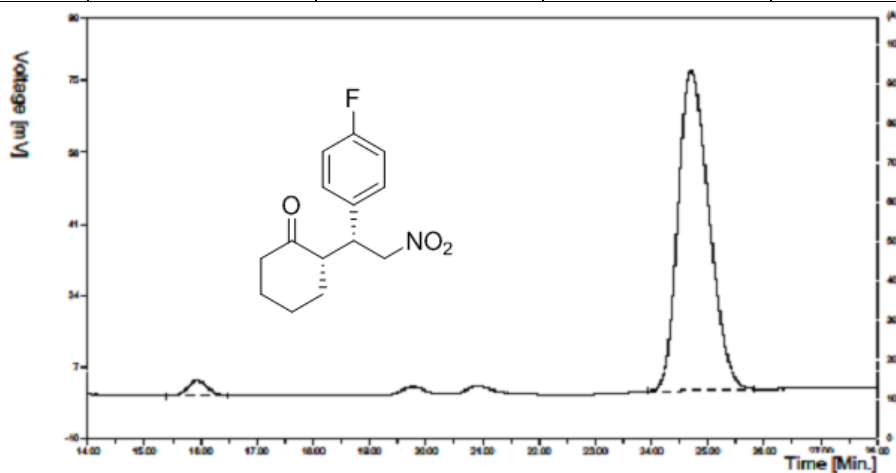

Peak Table

| Peak# | Ret. Time(min) | Height(mV) | Area(mv.sec) | Area%   |
|-------|----------------|------------|--------------|---------|
| 1     | 15.93          | 3.60       | 87.53        | 2.9281  |
| 2     | 24.71          | 75.82      | 2901.66      | 97.0719 |
| Total |                | 79.42      | 2989.19      | 100     |

## 2.5.6 The HPLC Spectra of compound 3f

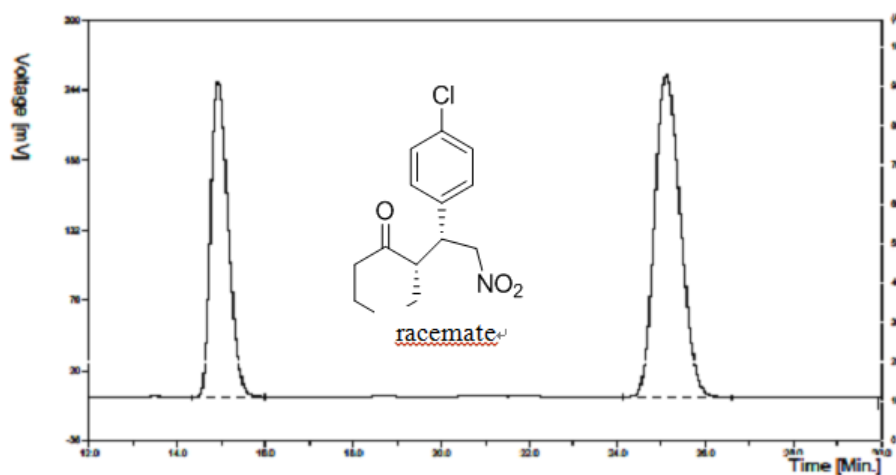

Peak Table

| Peak# | Ret. Time(min) | Height(mV) | Area(mv.sec) | Area%   |
|-------|----------------|------------|--------------|---------|
| 1     | 14.92          | 251.87     | 6996.93      | 39.9799 |
| 2     | 25.11          | 257.49     | 10504.20     | 60.0201 |
| Total |                | 509.36     | 17501.13     | 100     |

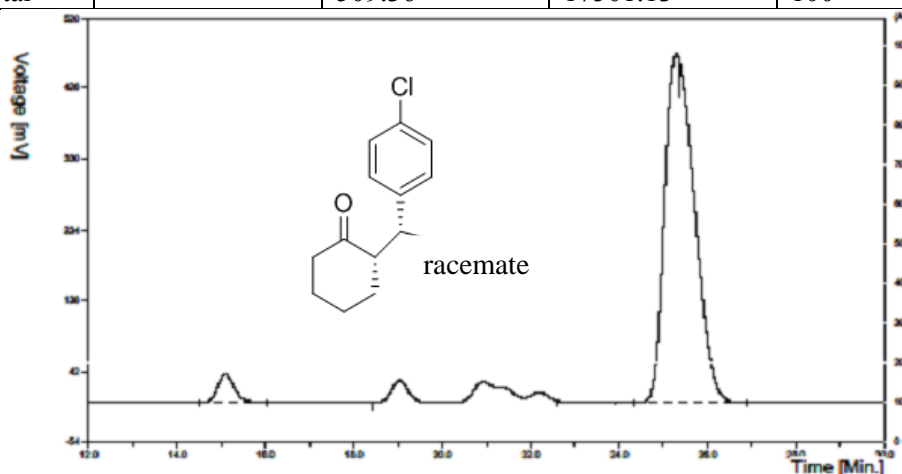

Peak Table

| Peak# | Ret. Time(min) | Height(mV) | Area(mv.sec) | Area%   |
|-------|----------------|------------|--------------|---------|
| 1     | 15.09          | 38.34      | 1029.76      | 4.4421  |
| 2     | 25.30          | 474.06     | 22152.25     | 95.5579 |
| Total |                | 512.40     | 23182.01     | 100     |

### 2.5.7 The HPLC Spectra of compound 3g

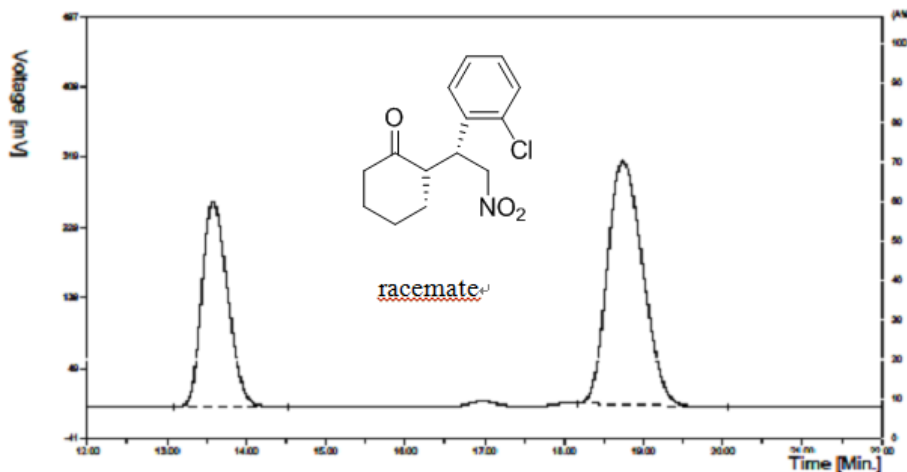

Peak Table

| Peak# | Ret. Time(min) | Height(mV) | Area(mv.sec) | Area%   |
|-------|----------------|------------|--------------|---------|
| 1     | 13.58          | 261.99     | 5925.75      | 38.0151 |
| 2     | 18.74          | 310.75     | 9662.13      | 61.9849 |
| Total |                | 572.74     | 15587.88     | 100     |

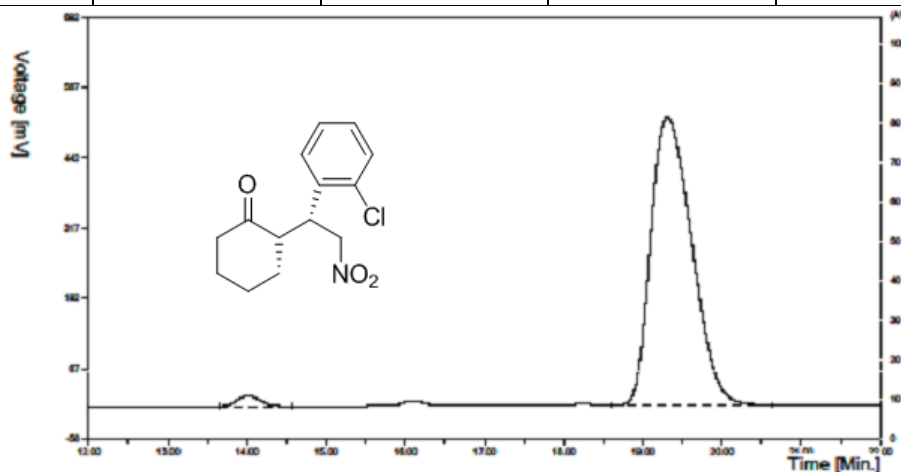

Peak Table

| Peak# | Ret. Time(min) | Height(mV) | Area(mv.sec) | Area%   |
|-------|----------------|------------|--------------|---------|
| 1     | 14.01          | 19.92      | 414.42       | 2.1977  |
| 2     | 19.31          | 511.41     | 18442.32     | 97.8023 |
| Total |                | 531.33     | 18856.74     | 100     |



## 2.5.8 The HPLC Spectra of compound 3h

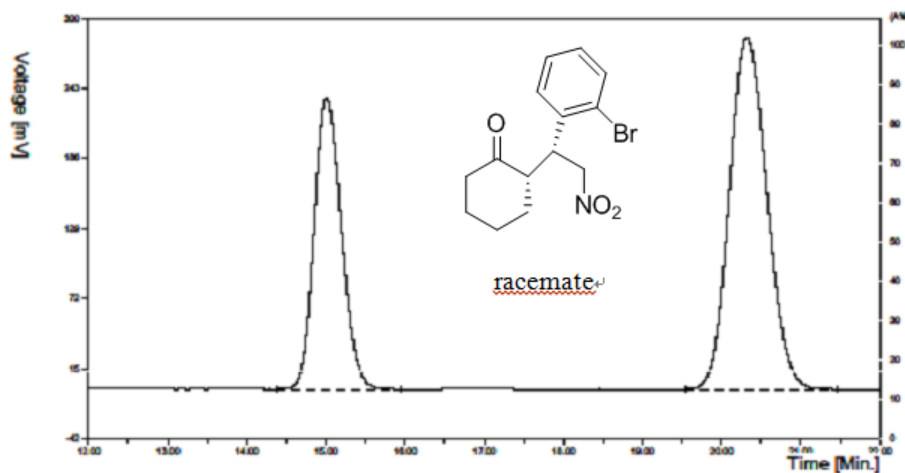

Peak Table

| Peak# | Ret. Time(min) | Height(mV) | Area(mv.sec) | Area%   |
|-------|----------------|------------|--------------|---------|
| 1     | 15.01          | 237.06     | 5673.47      | 37.6128 |
| 2     | 20.32          | 286.17     | 9410.41      | 62.3872 |
| Total |                | 523.23     | 15083.88     | 100     |

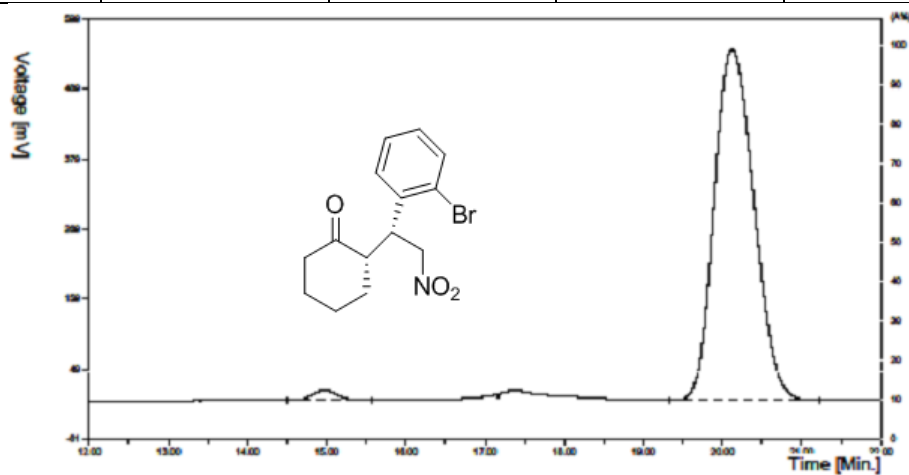

Peak Table

| Peak# | Ret. Time(min) | Height(mV) | Area(mv.sec) | Area%   |
|-------|----------------|------------|--------------|---------|
| 1     | 14.97          | 16.61      | 366.50       | 1.8713  |
| 2     | 20.12          | 551.21     | 19218.53     | 98.1287 |
| Total |                | 567.82     | 19585.03     | 100     |

## 2.5.9 The HPLC Spectra of compound 3i

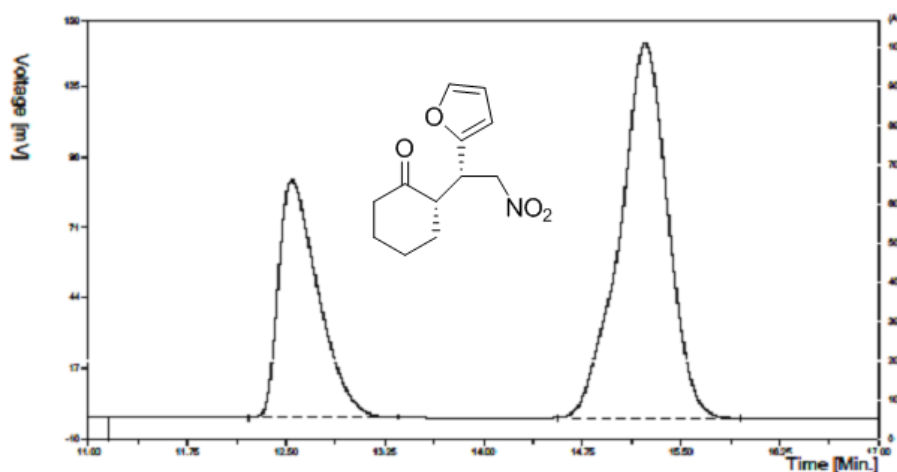

Peak Table

| Peak# | Ret. Time(min) | Height(mV) | Area(mv.sec) | Area%   |
|-------|----------------|------------|--------------|---------|
| 1     | 12.55          | 90.54      | 1886.80      | 34.0903 |
| 2     | 15.23          | 143.14     | 3647.91      | 65.9097 |
| Total |                | 233.68     | 5534.71      | 100     |

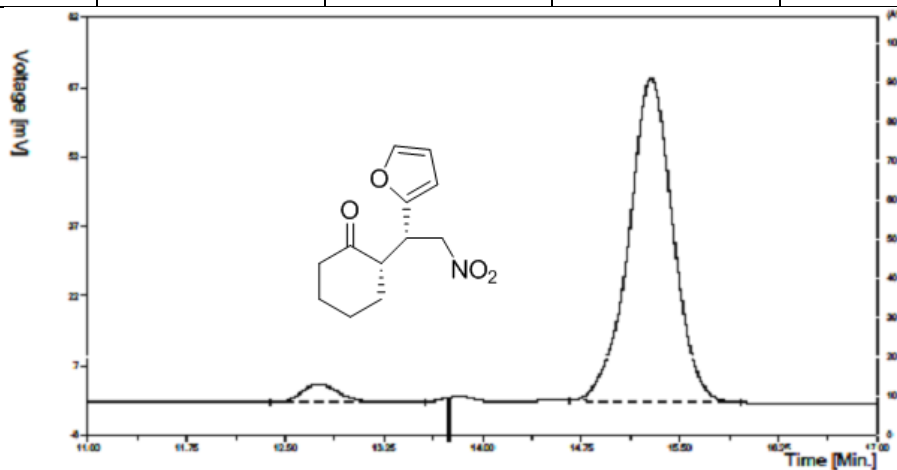

Peak Table

| Peak# | Ret. Time(min) | Height(mV) | Area(mv.sec) | Area%   |
|-------|----------------|------------|--------------|---------|
| 1     | 12.75          | 3.88       | 71.96        | 4.2260  |
| 2     | 15.28          | 69.76      | 1630.89      | 95.7740 |
| Total |                | 73.64      | 1702.85      | 100     |

### 2.5.10 The HPLC Spectra of compound 3j

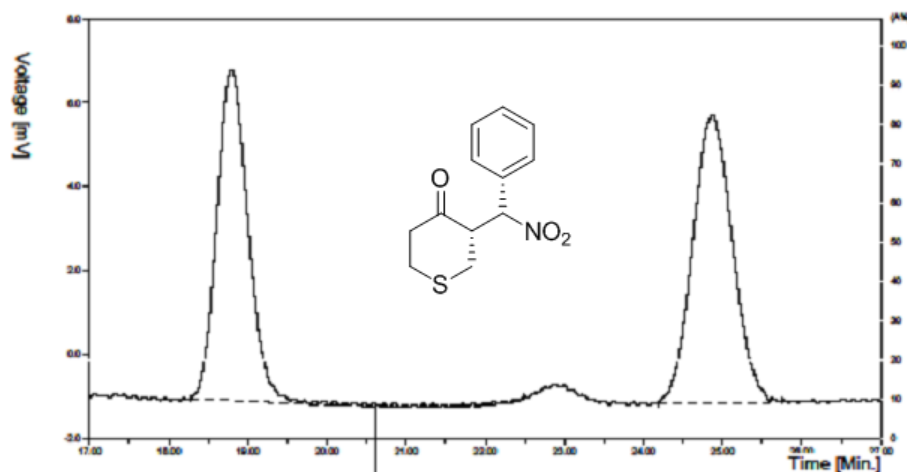

Peak Table

| Peak# | Ret. Time(min) | Height(mV) | Area(mv.sec) | Area%   |
|-------|----------------|------------|--------------|---------|
| 1     | 18.79          | 7.82       | 182.97       | 43.4258 |
| 2     | 24.87          | 6.84       | 238.37       | 56.5742 |
| Total |                | 14.66      | 421.34       | 100     |

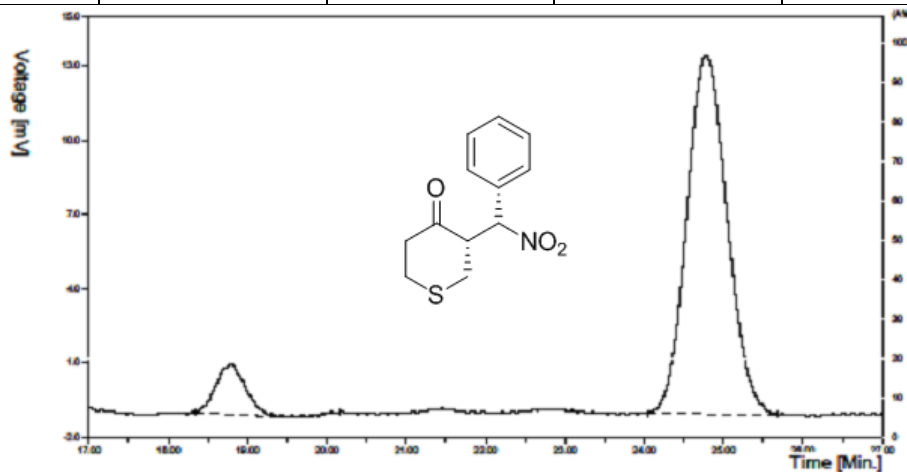

Peak Table

| Peak# | Ret. Time(min) | Height(mV) | Area(mv.sec) | Area%   |
|-------|----------------|------------|--------------|---------|
| 1     | 18.79          | 1.93       | 41.73        | 7.5451  |
| 2     | 24.76          | 14.45      | 511.32       | 92.4549 |
| Total |                | 16.38      | 553.05       | 100     |

### 2.5.11 The HPLC Spectra of compound 3k

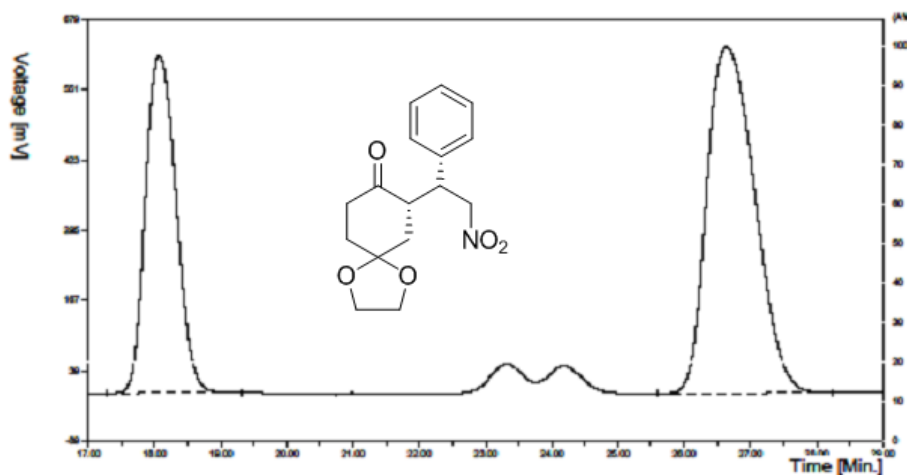

Peak Table

| Peak# | Ret. Time(min) | Height(mV) | Area(mv.sec) | Area%   |
|-------|----------------|------------|--------------|---------|
| 1     | 18.07          | 614.76     | 19776.47     | 38.3977 |
| 2     | 26.64          | 631.06     | 31727.81     | 61.6023 |
| Total |                | 1245.82    | 51504.28     | 100     |

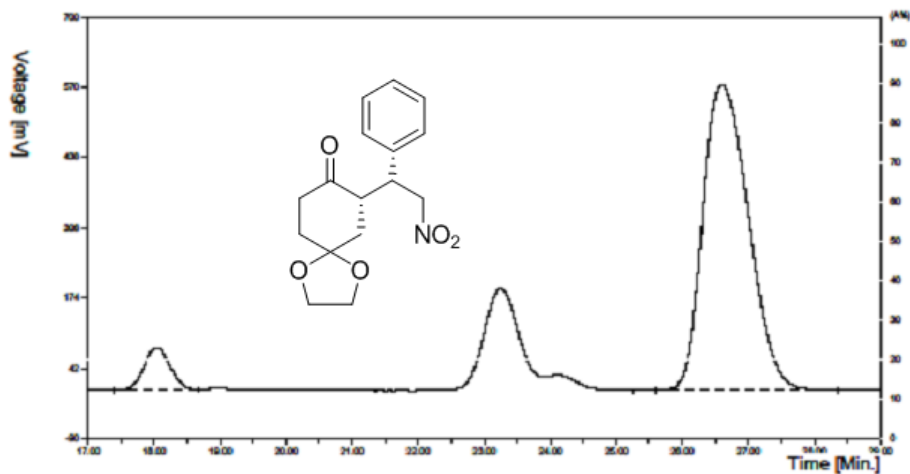

Peak Table

| Peak# | Ret. Time(min) | Height(mV) | Area(mv.sec) | Area%   |
|-------|----------------|------------|--------------|---------|
| 1     | 18.04          | 80.01      | 2181.56      | 7.3417  |
| 2     | 26.60          | 573.06     | 27533.14     | 92.6583 |
| Total |                | 653.07     | 29714.7      | 100     |

### 3 Cartesian Coordinates of Intermediates and Transition States

**Table S1.** Total energies using the B3LYP/6-31G(d) and imaginary frequencies using the DFTB-D method for all structures of the reaction pathways.

| name             | Total energy <sup>a</sup><br>(hartree) | imaginary<br>freq [cm <sup>-1</sup> ] | $\Delta H$<br>(kcal.mol <sup>-1</sup> ) |
|------------------|----------------------------------------|---------------------------------------|-----------------------------------------|
| 4                | -1206.070129                           |                                       |                                         |
| cyclohexanone    | -309.739549                            |                                       |                                         |
| H <sub>2</sub> O | -76.387785                             |                                       |                                         |
| anti-enamine     | -1439.391577                           |                                       | 19.0                                    |
| anti-SRts        | -1953.398429                           | -290.24                               | 4.9                                     |
| anti-SR          | -1953.410084                           |                                       | -7.3                                    |
| anti-SSts        | -1953.39171                            | -299.42                               | 9.1                                     |
| anti-SS          | -1953.396587                           |                                       | -3.1                                    |
| syn-enamine      | -1439.394387                           |                                       | 17.3                                    |
| syn-RRts         | -1953.393229                           | -313.23                               | 10.0                                    |
| syn-RR           | -1953.381791                           |                                       | 7.2                                     |
| syn-RSts         | -1953.38038                            | -255.53                               | 18.0                                    |
| syn-RS           | -1953.366831                           |                                       | 8.5                                     |

*a* Sum of electronic and zero-point Energies

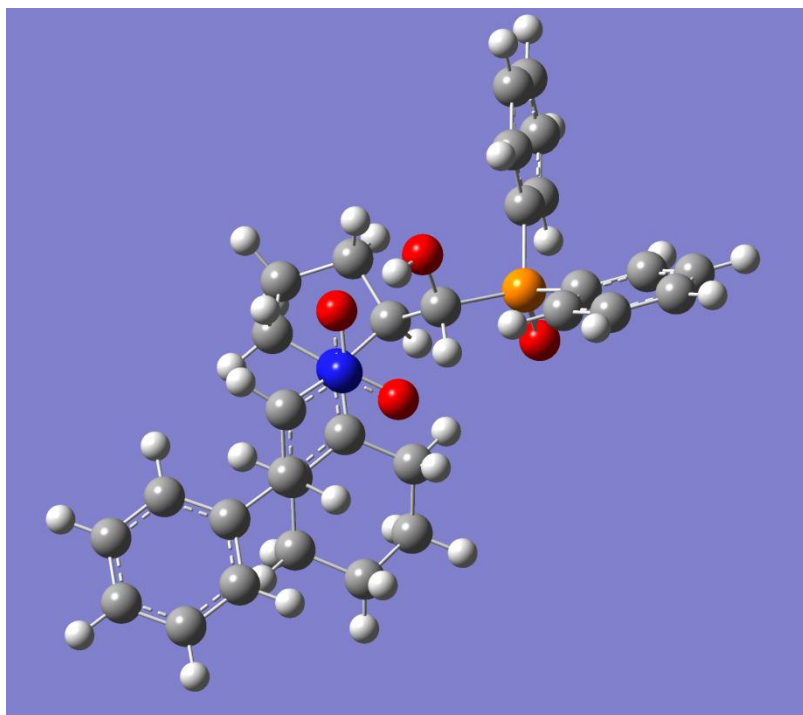

**Figure S1** the transition structure of anti-SRts

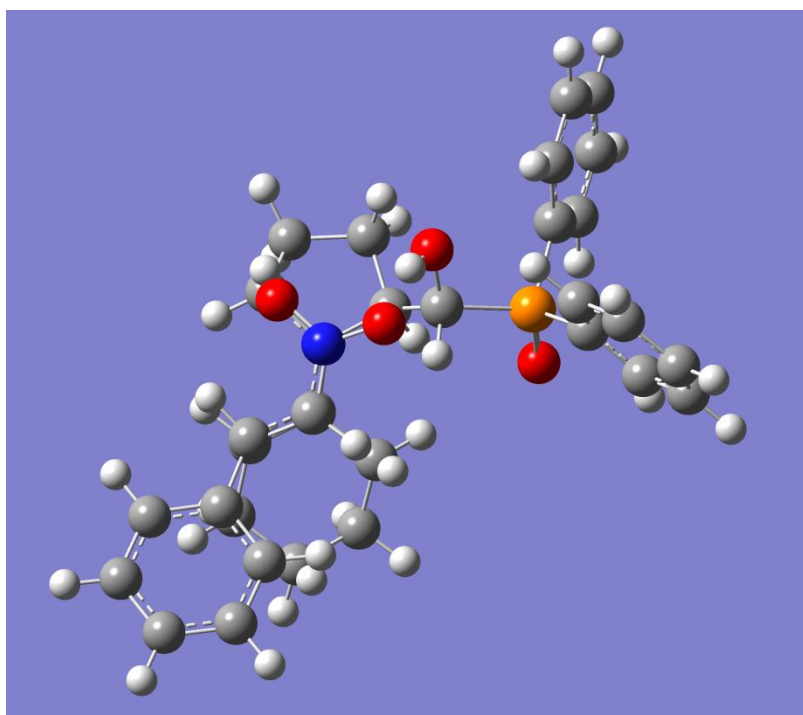

**Figure S2** the transition structure of anti-SSts

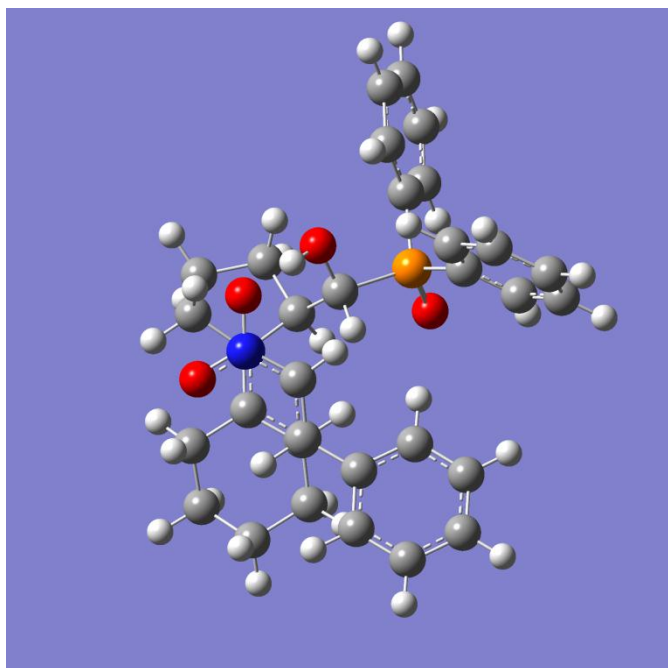

**Figure S3** the transition structure of Syn-RRts

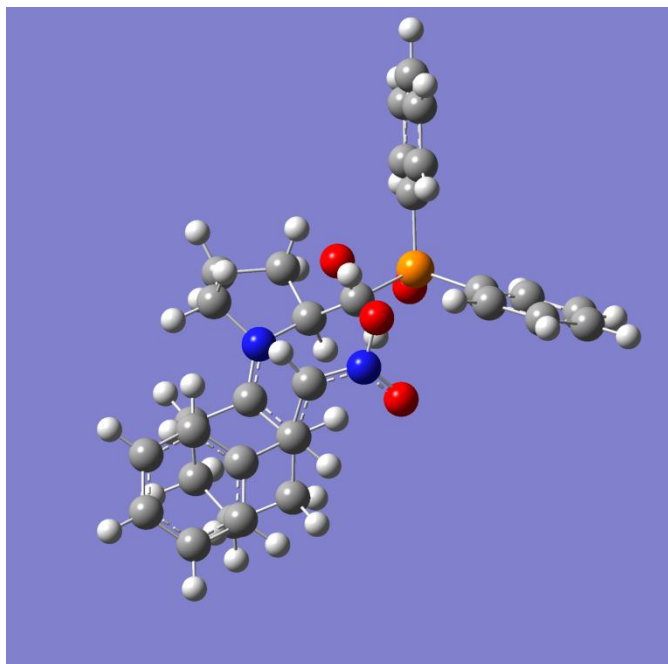

**Figure S4** the transition structure of Syn-RSts

**Table S2.** Cartesian coordinates in [Å] for the Optimized structures using the B3LYP/6-31G(d).

**Cartesian coordinates of compound 4**

Charge = 0 Multiplicity = 1

P,0,-0.0420130186,-0.0192336881,0.0569066365

C,0,0.0729128502,0.0519297117,1.8839703438

O,0,2.6754514174,0.1438948274,0.008466003

N,0,3.2584245033,-2.2804699444,-1.0105887056

O,0,-1.1446315823,-0.9384500149,-0.4015864326

C,0,1.8496793856,-2.0601810621,-0.5933582998

C,0,-0.2737788965,1.6999417296,-0.526108676

C,0,1.7915477238,-2.7306006854,0.7867200401

C,0,-0.9223283271,-0.6364738616,2.5924810087

C,0,1.6096226287,-0.5335844499,-0.6342488056

C,0,1.0492179691,0.7744718014,2.5878162154

C,0,0.7651117519,2.6404473394,-0.60669999

C,0,0.4982938869,3.9353115418,-1.053371504  
C,0,-1.5720056724,2.0670134363,-0.9082494538  
C,0,-0.7990316659,4.2997947287,-1.4207943153  
C,0,0.0347946706,0.1084113179,4.6834698079  
C,0,3.8090072204,-3.4671210649,-0.3048516526  
C,0,-0.9404930474,-0.6073997338,3.9877614521  
C,0,2.6647645325,-3.9787067019,0.5912166657  
C,0,1.0282753529,0.7967744195,3.9822655168  
C,0,-1.8327843692,3.3639899579,-1.3512323448  
H,0,3.4513166039,-0.4139880081,-0.2342736595  
H,0,1.1271286289,-2.5416882966,-1.2661527267  
H,0,2.2304205827,-2.0666674433,1.5397738662  
H,0,0.7656323688,-2.9572739073,1.0864735227  
H,0,-1.6742679298,-1.1883886705,2.0360566481  
H,0,1.5516804736,-0.2368460766,-1.6974356138  
H,0,1.8296549878,1.3011396872,2.0509164128  
H,0,1.7788940593,2.3549397491,-0.3421397275  
H,0,1.306108176,4.6596576348,-1.1186169826  
H,0,-2.3634847744,1.3242858686,-0.8690411035  
H,0,-1.0019193605,5.3098660677,-1.767446784  
H,0,0.0216202212,0.1322224274,5.770168614  
H,0,4.6760400087,-3.1657860724,0.2968621719  
H,0,4.1557443979,-4.2282213748,-1.0138576529  
H,0,-1.7159575278,-1.1423403141,4.5297966296  
H,0,2.0927864859,-4.7564747732,0.0703389513  
H,0,3.0257015458,-4.4067673541,1.5317413279  
H,0,1.7889150606,1.3539123945,4.5230620829  
H,0,-2.8410471174,3.6419634935,-1.6467801697  
H,0,3.3348114279,-2.3720227737,-2.0193105908

**Cartesian coordinates of anti-enamine**

Charge = 0 Multiplicity = 1

P,0,0.0990305924,0.1513855227,0.0345213114  
C,0,-0.0498226715,0.0031651967,1.8541396267  
O,0,2.7879386299,0.0056255588,0.4070416265  
N,0,3.2571508637,-2.3698277216,-1.0024079756  
O,0,-0.9974315865,-0.5910704753,-0.6840841903  
C,0,1.8631736214,-1.9782061935,-0.6896897832

C,0,0.1047092278,1.9406689211,-0.349128634  
C,0,1.5422734314,-2.7748979885,0.590222714  
C,0,-1.176083734,-0.6847016945,2.327905018  
C,0,1.7882216273,-0.4422093545,-0.497994442  
C,0,0.8549205405,0.5632759964,2.7695176953  
C,0,1.2234914903,2.7693927983,-0.1716881418  
C,0,1.1395410932,4.1281129301,-0.4784239218  
C,0,-1.0885116435,2.4844265975,-0.8457113156  
C,0,-0.0549841547,4.6673811595,-0.9613812757  
C,0,-0.4878353068,-0.2636255667,4.6067324728  
C,0,3.700956001,-3.4922157094,-0.1528634019  
C,0,-1.3933853715,-0.8166433202,3.7003005193  
C,0,2.4103740448,-4.0302479686,0.473308272  
C,0,0.6349548833,0.4247656364,4.1397168234  
C,0,-1.1671619345,3.8441788466,-1.1477926488  
H,0,3.5788432191,-0.5172574456,0.1656671664  
H,0,1.1632102687,-2.2563599311,-1.4864659672  
H,0,1.8414083302,-2.1945008933,1.4692563521  
H,0,0.472540768,-2.9827233629,0.668505805  
H,0,-1.8719815018,-1.1083949917,1.609736124  
H,0,1.9262090469,0.0371228861,-1.4787492538  
H,0,1.7332489753,1.0902694425,2.4149599512  
H,0,2.159024739,2.3500550618,0.1866651075  
H,0,2.0095043441,4.7656612279,-0.3438490601  
H,0,-1.9407320833,1.8303298475,-1.0052901695  
H,0,-0.1161916655,5.7264094076,-1.1983417386  
H,0,-0.6560200448,-0.3660692619,5.6757487701  
H,0,4.4102942184,-3.1588163012,0.6197914822  
H,0,4.2157549723,-4.2373289597,-0.7689288016  
H,0,-2.2692889316,-1.3500373514,4.0601675636  
H,0,1.9444917864,-4.7564002442,-0.2039830411  
H,0,2.5802886778,-4.5274202643,1.433707972  
H,0,1.3407967532,0.856335282,4.8445946818  
H,0,-2.0945414899,4.2594407268,-1.533366352  
C,0,3.8823038671,-2.1687013796,-2.2550247791  
C,0,3.045827984,-1.5947754035,-3.3890798168  
C,0,5.1807699284,-2.4894149164,-2.4462139685  
C,0,3.6781934253,-1.8445279455,-4.766382301



H,0,2.9131699713,-0.5117531223,-3.2524862456  
H,0,2.0378516082,-2.0248607485,-3.3702512096  
C,0,5.9218491494,-2.3350111072,-3.751951446  
H,0,5.7589627505,-2.8859731693,-1.6149867081  
C,0,5.1615094443,-1.4672813486,-4.7622789779  
H,0,3.129017335,-1.2747891998,-5.5258683284  
H,0,3.5734705278,-2.9065536648,-5.0281615917  
H,0,6.9153054763,-1.9040472936,-3.5621806682  
H,0,6.1163495129,-3.3266570405,-4.1941315648  
H,0,5.5945495807,-1.5778960746,-5.7639986072  
H,0,5.2618587789,-0.4078749453,-4.4872444224

### Cartesian coordinates of syn-enamine

Charge = 0 Multiplicity = 1

P,0,0.1271428135,0.094127592,-0.011988123  
C,0,-0.0593904358,-0.0118356579,1.8072727243  
O,0,2.820009973,-0.0103212346,0.3743870515  
N,0,3.2907433387,-2.4290167078,-0.9315521227  
O,0,-0.9589276088,-0.6611807495,-0.7333851522  
C,0,1.9005009563,-2.0655195417,-0.567956329  
C,0,0.145773207,1.8737845501,-0.4390855669  
C,0,1.6811374092,-2.7962389077,0.7648144126  
C,0,-1.2087978059,-0.6663562551,2.272966595  
C,0,1.8164925756,-0.5253981033,-0.4932527467  
C,0,0.8408191956,0.5457444098,2.7286608461  
C,0,1.2597687774,2.7073326598,-0.2542944052  
C,0,1.1835583072,4.0577446514,-0.5975750318  
C,0,-1.0343244468,2.4043772625,-0.9795261247  
C,0,0.0018964401,4.5842302945,-1.1241900977  
C,0,-0.5540431899,-0.2151439711,4.5558790642  
C,0,3.7053075987,-3.6638990007,-0.2095885755  
C,0,-1.4543591966,-0.7666591479,3.6432794065  
C,0,2.457153412,-4.1027012988,0.5712463907  
C,0,0.5922387919,0.4391233762,4.0969904234  
C,0,-1.1052135302,3.755974287,-1.317994593  
H,0,3.5989763866,-0.5714453142,0.1798946276  
H,0,1.1675620452,-2.4238663823,-1.3028900691  
H,0,2.1094924075,-2.2093012478,1.5843491123

H,0,0.6194969795,-2.9483389172,0.9732418429  
H,0,-1.899764306,-1.0897299591,1.5497801903  
H,0,1.9616468127,-0.1315886194,-1.5109607134  
H,0,1.7376006047,1.045027529,2.3799318831  
H,0,2.1861674162,2.296603624,0.1354639567  
H,0,2.0501195483,4.6988224081,-0.4575596995  
H,0,-1.8821053038,1.7458431242,-1.1443756097  
H,0,-0.0530314727,5.6369197998,-1.3894562925  
H,0,-0.7445562533,-0.2924951611,5.623282238  
H,0,4.5443681266,-3.4514658963,0.4662437119  
H,0,4.0337252052,-4.4380181134,-0.9119651431  
H,0,-2.3482001527,-1.2740549723,3.9967008684  
H,0,1.8669229493,-4.8032466606,-0.0314975997  
H,0,2.7069853518,-4.6024896201,1.5124888788  
H,0,1.2942456373,0.8688426214,4.8068687934  
H,0,-2.022381948,4.1607790903,-1.7376886952  
C,0,3.7585946507,-2.2439130369,-2.2595211012  
C,0,2.9666807358,-1.9235639958,-3.3005265216  
C,0,5.2683631658,-2.3270988498,-2.4060436736  
C,0,3.4775172604,-1.5955694584,-4.6836582645  
H,0,1.8887687663,-1.8804257013,-3.1710429303  
C,0,5.7237584233,-2.3835537723,-3.8708198405  
H,0,5.7152675514,-1.4538384661,-1.9051763846  
H,0,5.6544675688,-3.2011797663,-1.8669083607  
C,0,4.9891682166,-1.3326475562,-4.707764714  
H,0,2.9379919436,-0.7238414898,-5.0798446991  
H,0,3.2355207383,-2.42340778,-5.3701484519  
H,0,6.8098466352,-2.2401441783,-3.9242705544  
H,0,5.5160078331,-3.3821674326,-4.2799363838  
H,0,5.3583061318,-1.3287529544,-5.7405853135  
H,0,5.193805587,-0.335472155,-4.2931808747

### Cartesian coordinates of anti-SRTs

Charge = 0 Multiplicity = 1

P,0,2.8530089712,0.1356441389,0.7363712867  
C,0,4.1796048808,-0.8845175721,-0.0018564316  
O,0,1.5643999934,0.0037059607,-1.6211890422  
N,0,-0.8461608281,-1.4917261131,0.0558566465

O,0,2.6272030569,-0.2111509987,2.1908739773  
C,0,0.6567021874,-1.4994517963,0.1576187675  
C,0,3.3313149253,1.8729380208,0.420897929  
C,0,1.0995579452,-2.674513575,-0.7395794383  
C,0,4.7971813385,-1.833688527,0.8246921813  
C,0,1.2954290823,-0.139566926,-0.2441997332  
C,0,4.5913114151,-0.7523451275,-1.3378203707  
C,0,2.5019941077,2.7929733826,-0.2382134123  
C,0,2.908165463,4.1216695339,-0.379899759  
C,0,4.5656749286,2.3054696493,0.9333976785  
C,0,4.1355332046,4.5431518403,0.1317361315  
C,0,6.2205155124,-2.5124585087,-1.0079463557  
C,0,-1.2604086409,-2.4272675975,-1.0124163797  
C,0,5.81688516,-2.6441182312,0.3216991068  
C,0,-0.1707488125,-3.4990825936,-0.9797238229  
C,0,5.6065355113,-1.5683707994,-1.835865208  
C,0,4.9649711012,3.6325609646,0.790896017  
H,0,0.7749181448,0.4119133804,-2.0592936076  
H,0,0.9133401712,-1.697846597,1.2006200082  
H,0,1.4748948714,-2.2704689719,-1.6830675849  
H,0,1.9031221424,-3.2475775004,-0.2704210452  
H,0,4.4722869643,-1.920048666,1.8576947022  
H,0,0.6215262437,0.6543060582,0.0926019423  
H,0,4.1088513961,-0.0250325062,-1.9818088196  
H,0,1.545445018,2.4894062929,-0.6500935412  
H,0,2.2603235423,4.8261017038,-0.8945056113  
H,0,5.2145384275,1.6012842011,1.4476426763  
H,0,4.4468058956,5.5783143809,0.0173906822  
H,0,7.0145343229,-3.1430607983,-1.3999853395  
H,0,-1.2600636413,-1.8971396692,-1.9715931628  
H,0,-2.2600981216,-2.8182603031,-0.822388314  
H,0,6.2963113536,-3.3750683982,0.9677518927  
H,0,-0.3582395381,-4.1935941812,-0.1518681829  
H,0,-0.1350995164,-4.0777275195,-1.9077161507  
H,0,5.9212229919,-1.4661677826,-2.871140507  
H,0,5.9219819019,3.9556651123,1.1919067686  
C,0,-1.6715010971,-0.8948225938,0.9345714087  
C,0,-1.0726080776,-0.0839465846,2.0749393072

C,0,-3.0865534946,-0.9357946884,0.8029426817  
C,0,-1.9036084705,-0.1665920156,3.365053572  
H,0,-1.0393247426,0.96034309,1.7389723504  
H,0,-0.0390460512,-0.3651834818,2.2842557546  
C,0,-3.9463350603,-0.790401698,2.0525992786  
H,0,-3.4813179655,-1.6715479441,0.1095255245  
C,0,-3.3691092549,0.1733285686,3.0935817705  
H,0,-1.4683185253,0.5144138132,4.1051741036  
H,0,-1.8321988428,-1.17849504,3.7878709133  
H,0,-4.9598987546,-0.4874025716,1.768815382  
H,0,-4.0548600676,-1.7845500999,2.5158447689  
H,0,-3.9598342069,0.1210627637,4.0161770381  
H,0,-3.4412477583,1.2087025633,2.7313623346  
C,0,-2.8299086358,0.5724943281,-1.6974997771  
C,0,-5.0775044374,0.4735317622,-0.6384316304  
C,0,-5.9435709573,1.3164073119,0.078015348  
C,0,-5.6436760697,-0.5249132894,-1.4509514262  
C,0,-7.328063388,1.1794358416,-0.0252681568  
H,0,-5.5238640964,2.0961936714,0.7086576933  
C,0,-7.025468467,-0.6656194957,-1.5510317236  
H,0,-4.9971753476,-1.1999979898,-2.0054457415  
C,0,-7.8743249359,0.1875801216,-0.8402167598  
H,0,-7.9782438482,1.8486887187,0.5315992119  
H,0,-7.4424618733,-1.4434216721,-2.1851215326  
H,0,-8.9521481117,0.0768130632,-0.9202094361  
C,0,-3.6133505944,0.6793641834,-0.5369496225  
H,0,-3.3012742611,1.4548073253,0.1549558804  
H,0,-3.1195023307,0.039363887,-2.5904320105  
N,0,-1.5470622814,1.0403385392,-1.7172196603  
O,0,-0.821807246,0.7725147803,-2.7313490393  
O,0,-1.0937184019,1.7107930711,-0.7447291797

#### Cartesian coordinates of anti-SR

Charge = 0 Multiplicity = 1

P,0,-1.286327432,0.6335114529,-0.7171337385  
C,0,-2.6865881178,-0.5130110797,-0.977098662  
O,0,-0.5853986253,-0.7838971542,1.5036564999  
N,0,2.1701057725,-1.3862788527,0.1412655239

O,0,-0.6480299682,1.0504406267,-2.0242132687  
C,0,0.8092148494,-1.2039305997,-0.4945970925  
C,0,-1.946789159,1.990711463,0.3155611244  
C,0,0.2062276542,-2.627009703,-0.5435252527  
C,0,-3.0270289645,-0.8354589478,-2.2980994102  
C,0,-0.0212763561,-0.2043612982,0.3534297348  
C,0,-3.414198061,-1.0730732974,0.0858892704  
C,0,-1.2819498348,2.4719265809,1.4552012487  
C,0,-1.8038162616,3.5613142701,2.1561013336  
C,0,-3.1323637583,2.6164874186,-0.1042719309  
C,0,-2.979968663,4.1792272507,1.730631023  
C,0,-4.8058371329,-2.2640336174,-1.4975995605  
C,0,2.1264100202,-2.6655282897,0.9017377005  
C,0,-4.0869776384,-1.7070413902,-2.5564794171  
C,0,1.3034360197,-3.5678365394,-0.0144318512  
C,0,-4.4670152924,-1.9486547099,-0.1785130417  
C,0,-3.6445061325,3.7061640092,0.5968666118  
H,0,-0.0155829164,-0.5381629485,2.2927005549  
H,0,0.9521260936,-0.7914000286,-1.4932220611  
H,0,-0.6636376638,-2.658963593,0.1145165483  
H,0,-0.1141432306,-2.8853606772,-1.5556312405  
H,0,-2.4573160158,-0.3922268529,-3.1099963264  
H,0,0.6565431323,0.6066125247,0.6411218099  
H,0,-3.1444761714,-0.8335866213,1.1090980701  
H,0,-0.366340012,2.0121314613,1.8152313414  
H,0,-1.2861717113,3.9225581097,3.0404346413  
H,0,-3.6571218748,2.2487820899,-0.982132616  
H,0,-3.380415993,5.0261624059,2.2819527852  
H,0,-5.6311395818,-2.9426005022,-1.6980865527  
H,0,1.6050407552,-2.4609727847,1.8425227765  
H,0,3.1249486889,-3.0385148939,1.1171310382  
H,0,-4.3514166894,-1.948959746,-3.5826575744  
H,0,1.933833042,-3.944726712,-0.82860461  
H,0,0.8996746844,-4.4284090333,0.5260844325  
H,0,-5.0267444257,-2.3831455986,0.6456288132  
H,0,-4.5619781112,4.1825732668,0.2616068712  
C,0,3.155874191,-0.5280238217,0.0743029457  
C,0,3.0491004011,0.7291498414,-0.7589095997

C,0,4.4726146737,-0.7811920125,0.774600817  
C,0,4.2527697397,0.919253297,-1.7025431685  
H,0,3.0340924042,1.5500379977,-0.0332513938  
H,0,2.1100950516,0.7890836934,-1.3096449274  
C,0,5.6649392747,-0.4749290827,-0.1734963955  
H,0,4.5448325337,-1.8396837286,1.0289439789  
C,0,5.5633887939,0.8588266067,-0.9171034517  
H,0,4.137177864,1.8814015666,-2.2134934152  
H,0,4.2485998067,0.1453302731,-2.4827457319  
H,0,6.5870114227,-0.5289373143,0.4124598933  
H,0,5.7221224321,-1.2833286773,-0.9165642444  
H,0,6.4226940705,0.9698560055,-1.5893884449  
H,0,5.6080417457,1.6965998374,-0.2082904055  
C,0,3.4214254551,-0.4268615015,3.0776524712  
C,0,5.8967490656,-0.3107015258,2.8578219702  
C,0,6.7975984518,0.7336901466,3.1032481886  
C,0,6.2588485984,-1.6058288819,3.2591123227  
C,0,8.0220584877,0.4962139798,3.7305465571  
H,0,6.5316705308,1.7459743585,2.8080226918  
C,0,7.4815579017,-1.8480439395,3.8850414582  
H,0,5.5758192727,-2.4358247682,3.091916735  
C,0,8.3693631066,-0.7967251748,4.1226588885  
H,0,8.702383616,1.323767226,3.9136948938  
H,0,7.7392609444,-2.8586683339,4.1910488224  
H,0,9.321599629,-0.984404531,4.6111981088  
C,0,4.5575221595,-0.0249549382,2.1946646583  
H,0,4.482130166,1.047930951,1.9928343525  
H,0,3.483091374,-1.21625173,3.8124593044  
N,0,2.2231575427,0.1017121756,2.8802893082  
O,0,1.1800026738,-0.355905163,3.4941890423  
O,0,2.0873974115,1.0650099295,2.0240762027

#### Cartesian coordinates of anti-SSts

Charge = 0 Multiplicity = 1

P,0,-2.6968089421,0.3204601388,-0.8205647802  
C,0,-4.2171212819,-0.5351391156,-0.2684400851  
O,0,-1.6183723337,-0.2558061365,1.6106657022  
N,0,0.6569809795,-1.9110518309,-0.0489974244

O,0,-2.4077477117,0.0636825371,-2.2827464597  
C,0,-0.8109306332,-1.6696902945,-0.2700664346  
C,0,-2.8880458622,2.0988513139,-0.4468331703  
C,0,-1.5103557876,-2.8411720408,0.4547767173  
C,0,-4.9223884128,-1.2485258072,-1.2487713279  
C,0,-1.2761451661,-0.2731705657,0.2472898924  
C,0,-4.7046145797,-0.4984173982,1.047879307  
C,0,-2.7663426171,2.6498466611,0.8385091654  
C,0,-2.9311621761,4.0227404473,1.0247420001  
C,0,-3.166137633,2.9369322512,-1.5374006138  
C,0,-3.2209269044,4.8510639567,-0.0615161074  
C,0,-6.5824035336,-1.8793086653,0.3913480772  
C,0,0.8260076498,-2.9513217339,0.9857389827  
C,0,-6.1021633147,-1.9173648646,-0.9184605664  
C,0,-0.3963126927,-3.8446631744,0.7839333303  
C,0,-5.8820455179,-1.1718178555,1.37204702  
C,0,-3.3356996517,4.3077022288,-1.3425378994  
H,0,-0.8834394213,0.2215326474,2.0959886852  
H,0,-0.9933964207,-1.7121651349,-1.3455777465  
H,0,-1.9598505702,-2.4625434941,1.3749518752  
H,0,-2.3021115812,-3.2696757794,-0.1646081558  
H,0,-4.5364324871,-1.2664035771,-2.2637916936  
H,0,-0.481813955,0.457079327,0.0520707587  
H,0,-4.1593716766,0.0374074396,1.8164032353  
H,0,-2.5217951419,2.014311094,1.6819380192  
H,0,-2.8265597727,4.4449281172,2.0204650553  
H,0,-3.2327138393,2.5057486806,-2.5318822506  
H,0,-3.350305025,5.9196772312,0.0896335728  
H,0,-7.5015420256,-2.3990862688,0.6494209076  
H,0,0.834894413,-2.4452100497,1.9605082308  
H,0,1.7715928801,-3.4772083771,0.8528307384  
H,0,-6.6455868321,-2.4653963905,-1.6837595479  
H,0,-0.2217865577,-4.5338974952,-0.0512483138  
H,0,-0.615510828,-4.4412650916,1.6740764592  
H,0,-6.2540340074,-1.1435733444,2.3927831306  
H,0,-3.5520537666,4.9513273324,-2.1911954747  
C,0,1.6418065362,-1.3409076965,-0.7343176685  
C,0,1.311431956,-0.3249397585,-1.8033137821

C,0,3.0331955811,-1.5308393732,-0.4131775027  
C,0,2.2187541125,-0.4640696155,-3.038396155  
H,0,1.4762205242,0.6650672406,-1.3450424054  
H,0,0.2627751814,-0.3514443743,-2.1031843788  
C,0,4.0116202735,-1.4842362664,-1.5910301174  
H,0,3.2286163794,-2.3965244999,0.2142031612  
C,0,3.6937213259,-0.4149341557,-2.6414218042  
H,0,1.9729985321,0.3355933645,-3.7462491513  
H,0,1.994870388,-1.4123360445,-3.5462427329  
H,0,5.0301867315,-1.3516402441,-1.2136858125  
H,0,3.9977866316,-2.4726763412,-2.0775557116  
H,0,4.3345136657,-0.560505519,-3.519583099  
H,0,3.9307693686,0.5780819446,-2.2417883774  
C,0,2.426725428,0.7417470053,1.3432250078  
C,0,3.4797770549,-0.1679207693,1.0341537343  
C,0,4.8156857357,0.3827666965,0.6664091126  
C,0,5.9702594213,-0.3292493726,1.0336348914  
C,0,4.9832400097,1.6148268375,0.0107710043  
C,0,7.2444813321,0.1664608512,0.7578933077  
H,0,5.863480448,-1.2783575195,1.5541293111  
C,0,6.255097346,2.1114528391,-0.2685197019  
H,0,4.1134901749,2.2002200777,-0.2720611329  
C,0,7.3920137276,1.3895539759,0.1023924655  
H,0,8.1207047337,-0.4005728468,1.0607659345  
H,0,6.3585902744,3.0693490358,-0.7712868907  
H,0,8.3827412949,1.7805452296,-0.1122511958  
N,0,1.4518938413,0.3851554279,2.220425578  
O,0,1.5148066498,-0.6897664654,2.8845362359  
O,0,0.4519402703,1.1829266552,2.3690578454  
H,0,3.5446664612,-0.9409661437,1.794571256  
H,0,2.2718353667,1.7060462261,0.8830546437

#### Cartesian coordinates of anti-SS

Charge = 0 Multiplicity = 1

P,0,2.7374662675,0.1617155666,0.6287662655  
C,0,4.1088282127,-1.0210620066,0.3794103791  
O,0,1.4781526478,-1.0829029785,-1.4561212566  
N,0,-0.9260154056,-1.6746867804,0.4676975045

O,0,2.4737391653,0.4251628325,2.0946774216  
C,0,0.5440042495,-1.5520642559,0.7862550877  
C,0,3.1397923496,1.6795787937,-0.3047521978  
C,0,1.0921601265,-2.9880642349,0.6546451893  
C,0,4.7538490646,-1.4937227159,1.531416373  
C,0,1.2089325192,-0.5398864176,-0.192743216  
C,0,4.5409396602,-1.4504483386,-0.8855957951  
C,0,2.8601719745,1.8550048381,-1.6689072857  
C,0,3.2017285205,3.0530047648,-2.2986862444  
C,0,3.7504694047,2.7161574435,0.4183765994  
C,0,3.8234358508,4.0751837303,-1.5793296523  
C,0,6.2446259253,-2.8151920462,0.1622624174  
C,0,-1.1707599441,-3.0213553958,-0.1296905219  
C,0,5.8198359014,-2.3881604999,1.421304825  
C,0,-0.1491422286,-3.890190248,0.6001564402  
C,0,5.6038861916,-2.3473217577,-0.9882841228  
C,0,4.0946872804,3.9072082435,-0.2194789098  
H,0,0.778478307,-0.7073437714,-2.089145329  
H,0,0.6478360435,-1.1811677823,1.8063690872  
H,0,1.6505225941,-3.0646697962,-0.2809202986  
H,0,1.763642892,-3.2308109562,1.4815878177  
H,0,4.4125033805,-1.1489002252,2.503239255  
H,0,0.5448567163,0.3296130932,-0.290346129  
H,0,4.0390239899,-1.0986303309,-1.7799309129  
H,0,2.3600248395,1.0740140712,-2.2305052122  
H,0,2.9740498396,3.1867715105,-3.3526272563  
H,0,3.9341371287,2.5872686576,1.4811104828  
H,0,4.0887042164,5.0051809891,-2.075600641  
H,0,7.0753830699,-3.510859433,0.075592597  
H,0,-0.9800266333,-2.9400298648,-1.2013701681  
H,0,-2.2042415457,-3.3242115248,0.0295506451  
H,0,6.3186360187,-2.7486432555,2.3171969769  
H,0,-0.5076717928,-4.1369410459,1.6072485362  
H,0,0.0306452324,-4.8277937037,0.0665956397  
H,0,5.9338230499,-2.6806521158,-1.968611537  
H,0,4.5677850405,4.7059095095,0.3457625566  
C,0,-1.8062536529,-0.7392772891,0.6892473236  
C,0,-1.5108377792,0.4137213477,1.6112501396

C,0,-3.2415104571,-0.8422220022,0.2165705776  
C,0,-2.3829164909,0.2189471881,2.8820799164  
H,0,-1.812129369,1.3410804983,1.1190029966  
H,0,-0.4570859373,0.5088531772,1.8737729913  
C,0,-4.1818849955,-0.8719173299,1.4519156996  
H,0,-3.3599096901,-1.7802377587,-0.3195125433  
C,0,-3.873456535,0.1853661153,2.5242374937  
H,0,-2.1657173024,1.0385968273,3.5759780409  
H,0,-2.0852290685,-0.7098531579,3.3883715974  
H,0,-5.2187330247,-0.7770887895,1.1126246488  
H,0,-4.0960073632,-1.8699435825,1.9066356212  
H,0,-4.4685354046,-0.0263768078,3.4211072429  
H,0,-4.1786738154,1.1751350753,2.1706813891  
C,0,-2.2080394212,0.7295616142,-1.5309848875  
C,0,-3.506898284,0.2752137986,-0.923007311  
C,0,-4.42012344,1.4283208902,-0.5283320151  
C,0,-5.8099900263,1.2486761669,-0.6216049648  
C,0,-3.9558172405,2.6840255961,-0.1050728742  
C,0,-6.7022993532,2.2655057769,-0.2816946743  
H,0,-6.1968255076,0.2985915458,-0.9835537425  
C,0,-4.8437796074,3.7068498851,0.2340179398  
H,0,-2.8900011723,2.8823228355,-0.0481994434  
C,0,-6.2212889139,3.5011319231,0.1531958887  
H,0,-7.7721954704,2.0950382367,-0.3686509874  
H,0,-4.4542365455,4.6696379719,0.5544243021  
H,0,-6.9114648796,4.2989013599,0.4136956068  
N,0,-1.4846032798,-0.1335181008,-2.2400304286  
O,0,-1.8742136365,-1.3413738031,-2.3906255028  
O,0,-0.3443292191,0.2451188221,-2.7439694438  
H,0,-4.0465440566,-0.298707322,-1.6871137502  
H,0,-1.853024181,1.7481497283,-1.5373442573

#### Cartesian coordinates of syn-RRts

Charge = 0 Multiplicity = 1

P,0,-2.1426228729,0.4719031389,-0.7267028873  
C,0,-3.8387944442,-0.1140735197,-0.3725473745  
O,0,-1.3949926906,-0.5982176245,1.6390902424  
N,0,0.7069223266,-2.4594927955,0.1234738364

O,0,-1.8005863925,0.3672780577,-2.1927473379  
C,0,-0.5650400629,-1.8278805064,-0.3685806157  
C,0,-2.0026638251,2.1915483136,-0.1128665142  
C,0,-1.6470168897,-2.9134597856,-0.1128546485  
C,0,-4.6112033599,-0.4736642052,-1.4868705493  
C,0,-0.9186184836,-0.4863191936,0.3163464215  
C,0,-4.3972720957,-0.1947218185,0.91343199  
C,0,-1.9432371371,2.5434576172,1.2457880831  
C,0,-1.8252792446,3.8845212248,1.6133033999  
C,0,-1.9365219171,3.1950872464,-1.0911594365  
C,0,-1.7699511014,4.8805299595,0.6353732029  
C,0,-6.4780661857,-0.9864838816,-0.0391277999  
C,0,0.3569541429,-3.5560151321,1.045119443  
C,0,-5.9270948893,-0.9073040469,-1.3187776674  
C,0,-0.8988480333,-4.1523987855,0.4132883688  
C,0,-5.7115123011,-0.6326849276,1.0743625976  
C,0,-1.8235516778,4.5347156666,-0.7163272915  
H,0,-0.6283440686,-0.697583955,2.2674094059  
H,0,-0.4346857032,-1.6245023929,-1.4345433058  
H,0,-2.3380108067,-2.5486403101,0.6495658114  
H,0,-2.2186571225,-3.1179750819,-1.0215775126  
H,0,-4.168475267,-0.4075770143,-2.4763020772  
H,0,-0.0269517352,0.1474976026,0.2778511222  
H,0,-3.8030123186,0.0614513558,1.7827935448  
H,0,-1.96807475,1.7714183465,2.0077771582  
H,0,-1.7742296233,4.1510244755,2.6656054854  
H,0,-1.963948243,2.9107222676,-2.1389222686  
H,0,-1.681221309,5.9237471603,0.9272604276  
H,0,-7.502993303,-1.3237153993,0.0923698385  
H,0,0.1615300179,-3.1037508834,2.0278329135  
H,0,1.1789856413,-4.2552443615,1.1704020103  
H,0,-6.5204792618,-1.1822447053,-2.1868316347  
H,0,-0.6165503751,-4.8220313476,-0.4081829744  
H,0,-1.4920651945,-4.7282341906,1.1295392168  
H,0,-6.1380988963,-0.6976271775,2.0717948311  
H,0,-1.776924252,5.3071465243,-1.4795940736  
C,0,1.9292576831,-2.2361490066,-0.382965064  
C,0,2.268687904,-0.9758102426,-0.9596160166

C,0,3.0065153149,-3.3066985807,-0.2893321296  
C,0,3.3469512008,-0.9259964709,-2.0372703229  
H,0,1.4280902191,-0.3243445675,-1.1856488336  
C,0,3.9289877498,-3.3114366568,-1.5212457823  
H,0,3.593963154,-3.1316788214,0.6186138689  
H,0,2.5513103784,-4.2946555923,-0.1829207666  
C,0,4.490176939,-1.9174572698,-1.8024932703  
H,0,3.7319343731,0.0948991097,-2.1232846049  
H,0,2.8728355706,-1.1488413585,-3.0055088462  
H,0,4.7359622424,-4.0345127297,-1.3527627346  
H,0,3.368927449,-3.6630785053,-2.3991342845  
H,0,5.1517016592,-1.9368903634,-2.6769535201  
H,0,5.1057796796,-1.5934313265,-0.9518573684  
C,0,1.9752410596,0.0906784384,1.6883686266  
C,0,2.9534250054,0.0776916258,0.6618821586  
C,0,3.326855069,1.3917042118,0.0659873566  
C,0,4.682320529,1.7040574048,-0.1270870035  
C,0,2.3651060211,2.3508178606,-0.295502458  
C,0,5.0674090605,2.9386289873,-0.6503478614  
H,0,5.4408159388,0.9760929258,0.1504378952  
C,0,2.74833627,3.5822692825,-0.8222129146  
H,0,1.3070582848,2.1385866851,-0.1695706512  
C,0,4.1011351419,3.8824330391,-1.0007165477  
H,0,6.1227379871,3.1614938401,-0.7830542043  
H,0,1.9853064025,4.3066014567,-1.0935765533  
H,0,4.3985296987,4.8433242663,-1.4116732942  
H,0,3.7988498357,-0.5742791307,0.864212154  
H,0,1.2875675023,0.9053044939,1.8588148093  
N,0,1.7837143288,-0.994808657,2.4947156347  
O,0,2.5861643799,-1.9633851586,2.4699747255  
O,0,0.7591899138,-1.0185135047,3.266966682

#### Cartesian coordinates of syn-RR

Charge = 0 Multiplicity = 1

P,0,-2.3608730857,0.445823725,-0.8870080203  
C,0,-3.857900953,-0.2278282552,-0.0774303985  
O,0,-0.9100409329,-0.7971697932,1.0785466379  
N,0,0.5352999741,-2.5697499186,-0.5264623566



O,0,-2.4611864053,0.4065010284,-2.3918957414  
C,0,-0.574259787,-1.7431564402,-1.1498807408  
C,0,-2.0995250505,2.1325276093,-0.2356190704  
C,0,-1.7636552072,-2.7209290506,-1.2129670769  
C,0,-4.9544531701,-0.4685175887,-0.919111481  
C,0,-0.8500902296,-0.4858647824,-0.2881081376  
C,0,-3.9755006062,-0.4696643369,1.3013179727  
C,0,-1.7072166727,2.4025575946,1.0859420305  
C,0,-1.5212755556,3.7218805025,1.4992516711  
C,0,-2.2991627623,3.1919366591,-1.1323907115  
C,0,-1.7296416249,4.7747362477,0.6048070372  
C,0,-6.2681928759,-1.182767247,0.9802417736  
C,0,0.0062185804,-3.9195810911,-0.1744001874  
C,0,-6.1554766324,-0.9426889432,-0.3900731612  
C,0,-1.1421863474,-4.1155422621,-1.1584411767  
C,0,-5.1776677702,-0.9491375683,1.8218829698  
C,0,-2.1172781167,4.5095309899,-0.70975545  
H,0,0.0326534749,-0.600585788,1.4113335751  
H,0,-0.2610796129,-1.4477995843,-2.1546543001  
H,0,-2.3980974694,-2.5716516353,-0.3346515582  
H,0,-2.3656230004,-2.5338870116,-2.103952858  
H,0,-4.8507273943,-0.2820629929,-1.9839996534  
H,0,-0.0450128789,0.2369321383,-0.466827504  
H,0,-3.1272736706,-0.3095689407,1.9564282521  
H,0,-1.5277449093,1.5900991125,1.7826948273  
H,0,-1.2086195449,3.9253186011,2.5195693524  
H,0,-2.5865964783,2.9699691579,-2.155936185  
H,0,-1.5848458632,5.8008536126,0.9323987226  
H,0,-7.2035351946,-1.5517098256,1.3931405204  
H,0,-0.3487644436,-3.8866432601,0.8615524209  
H,0,0.7889472524,-4.6705743087,-0.2681723949  
H,0,-7.0014252185,-1.1240135255,-1.0478678328  
H,0,-0.7511603401,-4.4194512294,-2.1367797626  
H,0,-1.8404801125,-4.8850502657,-0.8181484909  
H,0,-5.2622997831,-1.1393288172,2.8884812542  
H,0,-2.275229438,5.3273835753,-1.4078843783  
C,0,1.7523419564,-2.1789758933,-0.2575885592  
C,0,2.3572059888,-0.9041618683,-0.8036515323

C,0,2.7060354125,-3.0505689822,0.5000593977  
C,0,3.5396088294,-1.3181751141,-1.7302689953  
H,0,1.6273997593,-0.3805626668,-1.4235103037  
C,0,3.9166779839,-3.4358498204,-0.3903672735  
H,0,3.0413285274,-2.4499979124,1.3655472789  
H,0,2.2301670234,-3.941781178,0.908861655  
C,0,4.5750952444,-2.2052937915,-1.0259357635  
H,0,4.0029918887,-0.398874903,-2.1044534033  
H,0,3.139158712,-1.8488785184,-2.6059473566  
H,0,4.6347851196,-3.9881468237,0.2252373409  
H,0,3.5801667609,-4.1239502011,-1.1794405723  
H,0,5.3375256553,-2.5227821795,-1.7475281472  
H,0,5.0992305605,-1.6317918749,-0.2530931154  
C,0,1.7474304366,0.1429325895,1.4799307254  
C,0,2.7952332129,0.0447429635,0.3696852451  
C,0,3.2249649084,1.402607609,-0.1727152008  
C,0,4.537445164,1.8542374272,0.0299059824  
C,0,2.3377416456,2.2490038176,-0.8569828919  
C,0,4.9513401529,3.1053826812,-0.4305873598  
H,0,5.2396426367,1.2219448783,0.5682950902  
C,0,2.7466014398,3.4994757632,-1.3200340974  
H,0,1.3069040185,1.9444605587,-1.0209085332  
C,0,4.0572979473,3.9328246349,-1.1104969202  
H,0,5.9731814442,3.432319256,-0.2555874387  
H,0,2.036366026,4.1367759045,-1.8402919285  
H,0,4.376400309,4.907279627,-1.4705093962  
H,0,3.6709102825,-0.4040621253,0.8447748328  
H,0,1.2385248268,1.0987024671,1.5803685464  
N,0,2.1545951772,-0.2878686289,2.7506849163  
O,0,3.1178613167,-1.1083998041,2.8679535829  
O,0,1.5157154894,0.0978290165,3.7515468058

#### Cartesian coordinates of syn-RSts

Charge = 0 Multiplicity = 1

P,0,-2.7873161462,-0.2068909781,-0.7130971583  
C,0,-4.0095010864,-0.7598052857,0.5344139076  
O,0,-1.1305230563,-0.3535646052,1.511151131  
N,0,1.0727324946,-1.7222433924,0.0670069061

O,0,-2.8587884004,-1.036964848,-1.9739705673  
C,0,-0.3325356392,-1.5121602981,-0.4672661376  
C,0,-3.1358158013,1.5610318915,-1.0146919146  
C,0,-1.0506819102,-2.8507373329,-0.1184740646  
C,0,-4.8081687048,-1.8602612254,0.1945034653  
C,0,-1.0689716291,-0.2884366769,0.1033009011  
C,0,-4.2026292065,-0.1199593431,1.7677522837  
C,0,-2.6242148275,2.610397221,-0.2370955427  
C,0,-2.9759424397,3.9282092943,-0.5377537586  
C,0,-3.986494061,1.8456452688,-2.0953552218  
C,0,-3.8331765603,4.2061963738,-1.6027418827  
C,0,-5.9658992228,-1.6867659899,2.3093158798  
C,0,1.0165410341,-2.8249288599,1.0483504003  
C,0,-5.783611136,-2.3219495871,1.0803014994  
C,0,0.0254780372,-3.8029221331,0.4265532325  
C,0,-5.1757474188,-0.5856179172,2.6506679446  
C,0,-4.33569433,3.1632448559,-2.3850447103  
H,0,-0.7873687603,0.5086336068,1.8594061107  
H,0,-0.2445730554,-1.3885769511,-1.5480120897  
H,0,-1.792468571,-2.6635988646,0.6623118306  
H,0,-1.5758941942,-3.2324388055,-0.994789883  
H,0,-4.6596614966,-2.3377969745,-0.7696868735  
H,0,-0.5635987788,0.6206991732,-0.2320853574  
H,0,-3.5967282202,0.7378827397,2.0389561039  
H,0,-1.9254709018,2.4324869331,0.575341472  
H,0,-2.5632191421,4.7367641531,0.0589865711  
H,0,-4.35313272,1.0295126385,-2.711203537  
H,0,-4.1012381694,5.2347534158,-1.8311397377  
H,0,-6.7256604901,-2.0442351406,2.9997995926  
H,0,0.6052400757,-2.3958937395,1.9689971528  
H,0,2.0068158389,-3.2241736724,1.2631203097  
H,0,-6.4022944532,-3.1733553736,0.8084115513  
H,0,0.5107242767,-4.3674094967,-0.379516208  
H,0,-0.3718234335,-4.5189957339,1.1518362568  
H,0,-5.3194547263,-0.0873428186,3.6057699327  
H,0,-4.9930167548,3.376735112,-3.2240244049  
C,0,2.1904002673,-1.3582107041,-0.5768597167  
C,0,2.3080702716,-0.0590112697,-1.1664997272

C,0,3.3850889791,-2.2900420791,-0.632405557  
C,0,3.2005998072,0.1029572508,-2.3992319128  
H,0,1.3646194024,0.4730960383,-1.2832302601  
C,0,4.0217281427,-2.2575743307,-2.0393091348  
H,0,4.1395193275,-1.9956349806,0.107683525  
H,0,3.0848322959,-3.3147555948,-0.3998920304  
C,0,4.4158736285,-0.8346681611,-2.4376517929  
H,0,3.521248977,1.1486706757,-2.4836296338  
H,0,2.5750895787,-0.0843994388,-3.2842577902  
H,0,4.8952585985,-2.9200802639,-2.0443949878  
H,0,3.3083947232,-2.6687635326,-2.7668671742  
H,0,4.8492731651,-0.8294019701,-3.4450921828  
H,0,5.1937998785,-0.4739283661,-1.756405216  
C,0,1.9368415186,1.2381379566,1.2590684161  
C,0,2.9311966291,1.1013674413,0.2418326712  
N,0,0.846075964,2.013024367,1.0340090996  
O,0,-0.0567198115,2.0821819221,1.9494914975  
O,0,0.6994280523,2.6244500834,-0.0610754761  
C,0,4.3150430809,0.7712170774,0.7049997865  
C,0,5.4113877154,1.4315402695,0.1269122051  
C,0,4.5685522271,-0.127109007,1.7567819525  
C,0,6.7132867435,1.1953968005,0.5700326891  
H,0,5.2378018694,2.1516216003,-0.668779465  
C,0,5.8683870789,-0.3659400554,2.2013426543  
H,0,3.7407138097,-0.6390318693,2.2401991137  
C,0,6.9478002571,0.2919775286,1.6073283808  
H,0,7.5427331468,1.7251802629,0.1093630443  
H,0,6.0375716578,-1.0618527735,3.0188095543  
H,0,7.9600370614,0.1088070864,1.9567823517  
H,0,2.9151938248,1.9534482459,-0.4370067317  
H,0,1.9661340788,0.7681937565,2.2294471025

#### Cartesian coordinates of syn-RS

Charge = 0 Multiplicity = 1

P,0,-2.3899525243,0.4778487038,-0.8760311346  
C,0,-3.8375990198,-0.1548923879,0.0563720148  
O,0,-1.0234270308,-0.9004124557,1.0788763335  
N,0,0.4750268432,-2.590393192,-0.5820028933



O,0,-2.5523754375,0.2801030699,-2.3654603859  
C,0,-0.5230996987,-1.6108105905,-1.2023157405  
C,0,-2.2019081027,2.2264135304,-0.4125981274  
C,0,-1.7379690198,-2.5055385577,-1.5277284104  
C,0,-4.9147773113,-0.6263251153,-0.7080197065  
C,0,-0.8529139405,-0.4336229036,-0.2411746877  
C,0,-3.9392607018,-0.1333887622,1.4563492538  
C,0,-1.6640756651,2.6560095,0.8073252906  
C,0,-1.5883429408,4.021117741,1.0848238692  
C,0,-2.6579179036,3.1675854305,-1.3497742145  
C,0,-2.0551514045,4.9557994429,0.1602287613  
C,0,-6.1713952711,-1.0622669798,1.3099317217  
C,0,-0.1755908503,-3.9303132188,-0.4598396693  
C,0,-6.0777668633,-1.0784076556,-0.0824356437  
C,0,-1.2022741839,-3.931805729,-1.5834238592  
C,0,-5.1022307588,-0.5901043805,2.0759345444  
C,0,-2.5886389146,4.5289504846,-1.0588569887  
H,0,-0.130903283,-0.7741875914,1.5079182813  
H,0,-0.0703447504,-1.2289059253,-2.1210968389  
H,0,-2.4667495652,-2.4266670411,-0.715207236  
H,0,-2.2187545546,-2.1624753793,-2.4427898891  
H,0,-4.8288924966,-0.6261284361,-1.7908198011  
H,0,-0.0558358872,0.31714173,-0.2800604074  
H,0,-3.1121018743,0.2254604766,2.0577134569  
H,0,-1.2642824126,1.9605350434,1.5379124523  
H,0,-1.139665843,4.3410692734,2.0203960224  
H,0,-3.0495844518,2.8225366086,-2.3020449848  
H,0,-1.9927362536,6.0183374807,0.3823624222  
H,0,-7.0771138437,-1.4121359351,1.7989418904  
H,0,-0.6549068492,-3.9737226015,0.5244893515  
H,0,0.5577038248,-4.7281593938,-0.5471644153  
H,0,-6.9102822184,-1.4377102407,-0.6820156975  
H,0,-0.7110798046,-4.1435861148,-2.5410147232  
H,0,-1.9749416587,-4.6891448713,-1.4240955488  
H,0,-5.1746298037,-0.5740974959,3.1602239919  
H,0,-2.941733123,5.2556591313,-1.7861015965  
C,0,1.7142232227,-2.3652094364,-0.2447062745  
C,0,2.4352705275,-1.0720749686,-0.5116811673  
C,0,2.6008669781,-3.4774629905,0.2409960259  
C,0,3.5353080595,-1.3758041556,-1.5804537236  
H,0,1.7433599497,-0.3629829947,-0.9662391966  
C,0,3.5783342473,-3.833294423,-0.9135190726  
H,0,3.1933478726,-3.1026412551,1.0782284591  
H,0,2.0571006235,-4.3517138929,0.595681525  
C,0,4.4136232968,-2.604812953,-1.2948330677  
H,0,4.155593735,-0.4791716586,-1.6889245328  
H,0,3.0301790241,-1.5168951905,-2.5463883278  
H,0,4.2224831346,-4.6567954844,-0.586027508  
H,0,3.0067489743,-4.1987824554,-1.7783268656  
H,0,5.0195972061,-2.8281327875,-2.1814532433  
H,0,5.1124016852,-2.3847381216,-0.4830038504  
C,0,1.7718640824,-0.1257218363,1.797092148  
C,0,2.9088515825,-0.2991027819,0.8037630814  
N,0,1.204856475,1.1367903735,1.8183922555  
O,0,0.537746449,1.5040306444,2.8220535847  
O,0,1.2990617052,1.8769623511,0.7890638665  
C,0,4.2217378839,-0.7244940528,1.4559465715  
C,0,5.4231163847,-0.1514781551,1.0046486707  
C,0,4.2997145374,-1.6040972888,2.5495155353  
C,0,6.6501745744,-0.4699635571,1.5876764875  
H,0,5.3924624709,0.5714458042,0.1929900616  
C,0,5.5242754208,-1.9287424899,3.1364965927  
H,0,3.3916418696,-2.0246040834,2.9724432734  
C,0,6.70752444,-1.3686360921,2.6540037315  
H,0,7.5593362548,-0.0034334388,1.2171824616  
H,0,5.5487883534,-2.6096095773,3.9834519953  
H,0,7.6600308608,-1.6146578654,3.1152946492  
H,0,3.0892760494,0.7019002499,0.3937912363  
H,0,1.8774397781,-0.5107096385,2.804541439

## 4 Reference

- [1] a) Y. J. Jang, Y. K. Shih, J. Y. Liu, W. Y. Kuo and C. F. Yao, *Chem.-Eur. J.* **2003**, *9*, 2123-2128; b) J. T. Liu and C. F. Yao, *Tetrahedron Lett.* **2001**, *42*, 6147-6150.
- [2] B. List, P. Pojarliev and H. J. Martin, *Org. Lett.* **2001**, *3*, 2423-2425.
- [3] T. Ishii, S. Fujioka, Y. Sekiguchi and H. Kotsuki, *J Am Chem Soc* **2004**, *126*, 9558-9559.
- [4] Vishnumaya and V. K. Singh, *Org. Lett.* **2007**, *9*, 1117-1119.
- [5] Vishnumaya and V. K. Singh, *Org. Lett.* **2007**, *9*, 1117-1119.
- [6] S. Luo, X. Mi, L. Zhang, S. Liu, H. Xu and J.-P. Cheng, *Angew. Chem. Int. Ed.* **2006**, *45*, 3093-3097.
- [7] J. R. Chen, Y. J. Cao, Y. Q. Zou, F. Tan, L. Fu, X. Y. Zhu and W. J. Xiao, *Org. Biomol. Chem.* **2010**, *8*, 1275-1279.
- [8] N. Mase, K. Watanabe, H. Yoda, K. Takabe, F. Tanaka and C. F. Barbas, *J. Am. Chem. Soc.* **2006**, *128*, 4966-4967.
- [9] S. V. Pansare and K. Pandya, *J. Am. Chem. Soc.* **2006**, *128*, 9624-9625.
- [10] B. Tan, X. Zeng, Y. Lu, P. J. Chua and G. Zhong, *Org. Lett.* **2009**, *11*, 1927-1930.
- [11] J. R. Chen, Y. J. Cao, Y. Q. Zou, F. Tan, L. Fu, X. Y. Zhu and W. J. Xiao, *Org. Biomol. Chem.* **2010**, *8*, 1275-1279.
